# Supplementary material for: Claisen rearrangements of equilibrating allylic azides
Source: Royal Society of Chemistry journal article supplement (doi:10.1039/c1ob05972f), 2011-01-01
Supplement: c1ob05972f.pdf [file c1ob05972f.pdf]

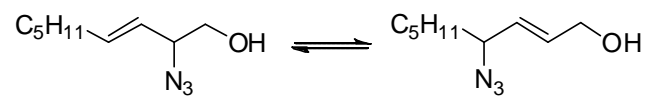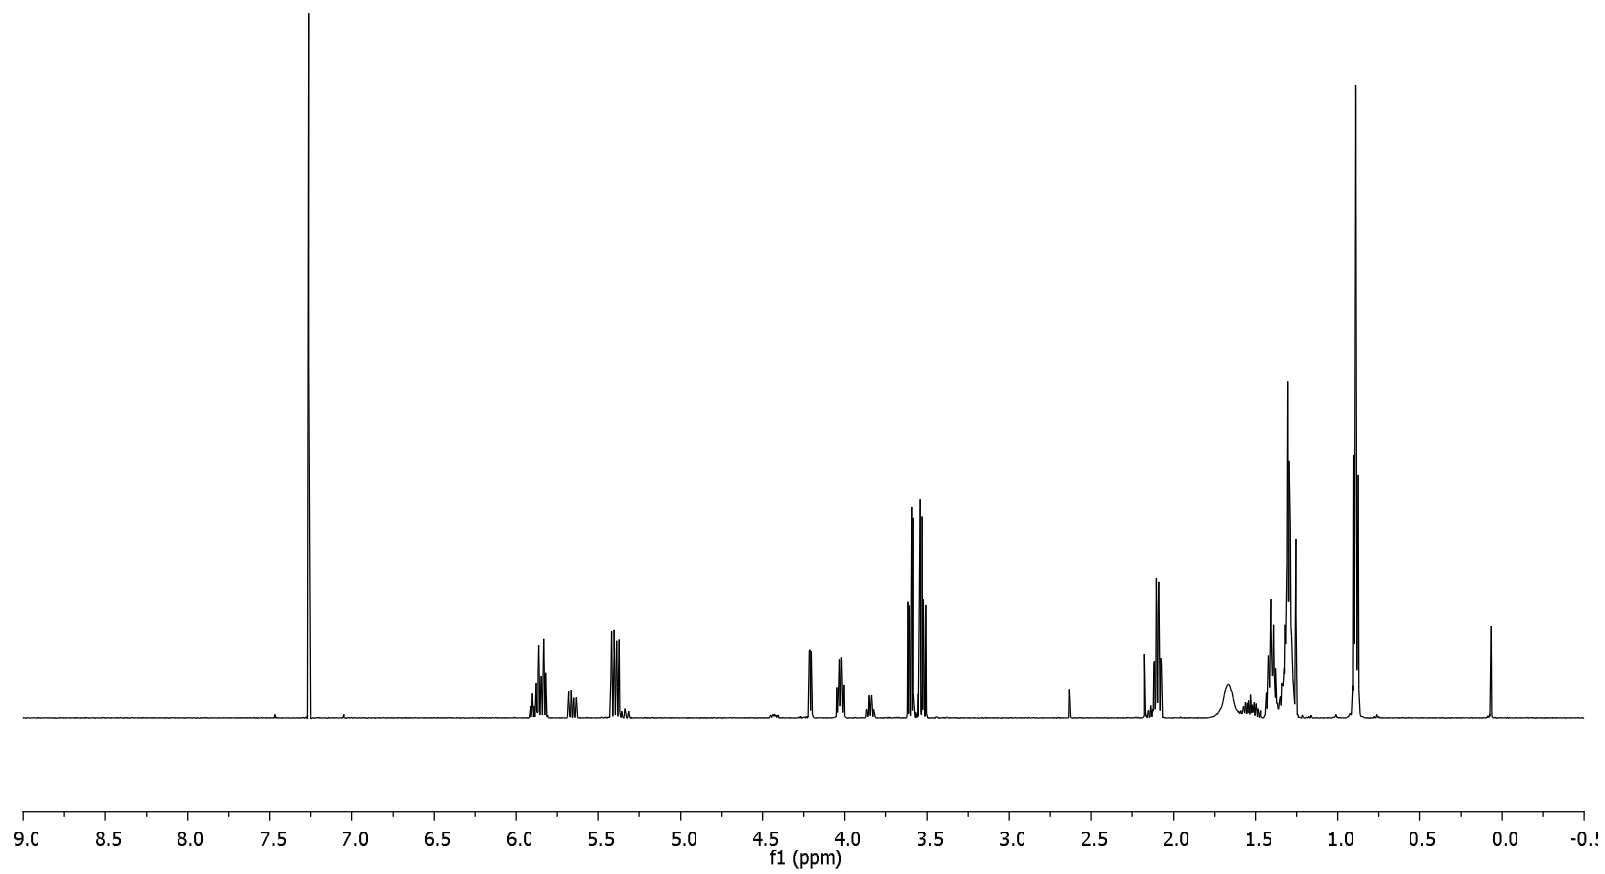

**5a** and **6a**, 400 MHz, CDCl<sub>3</sub>

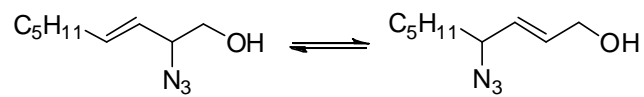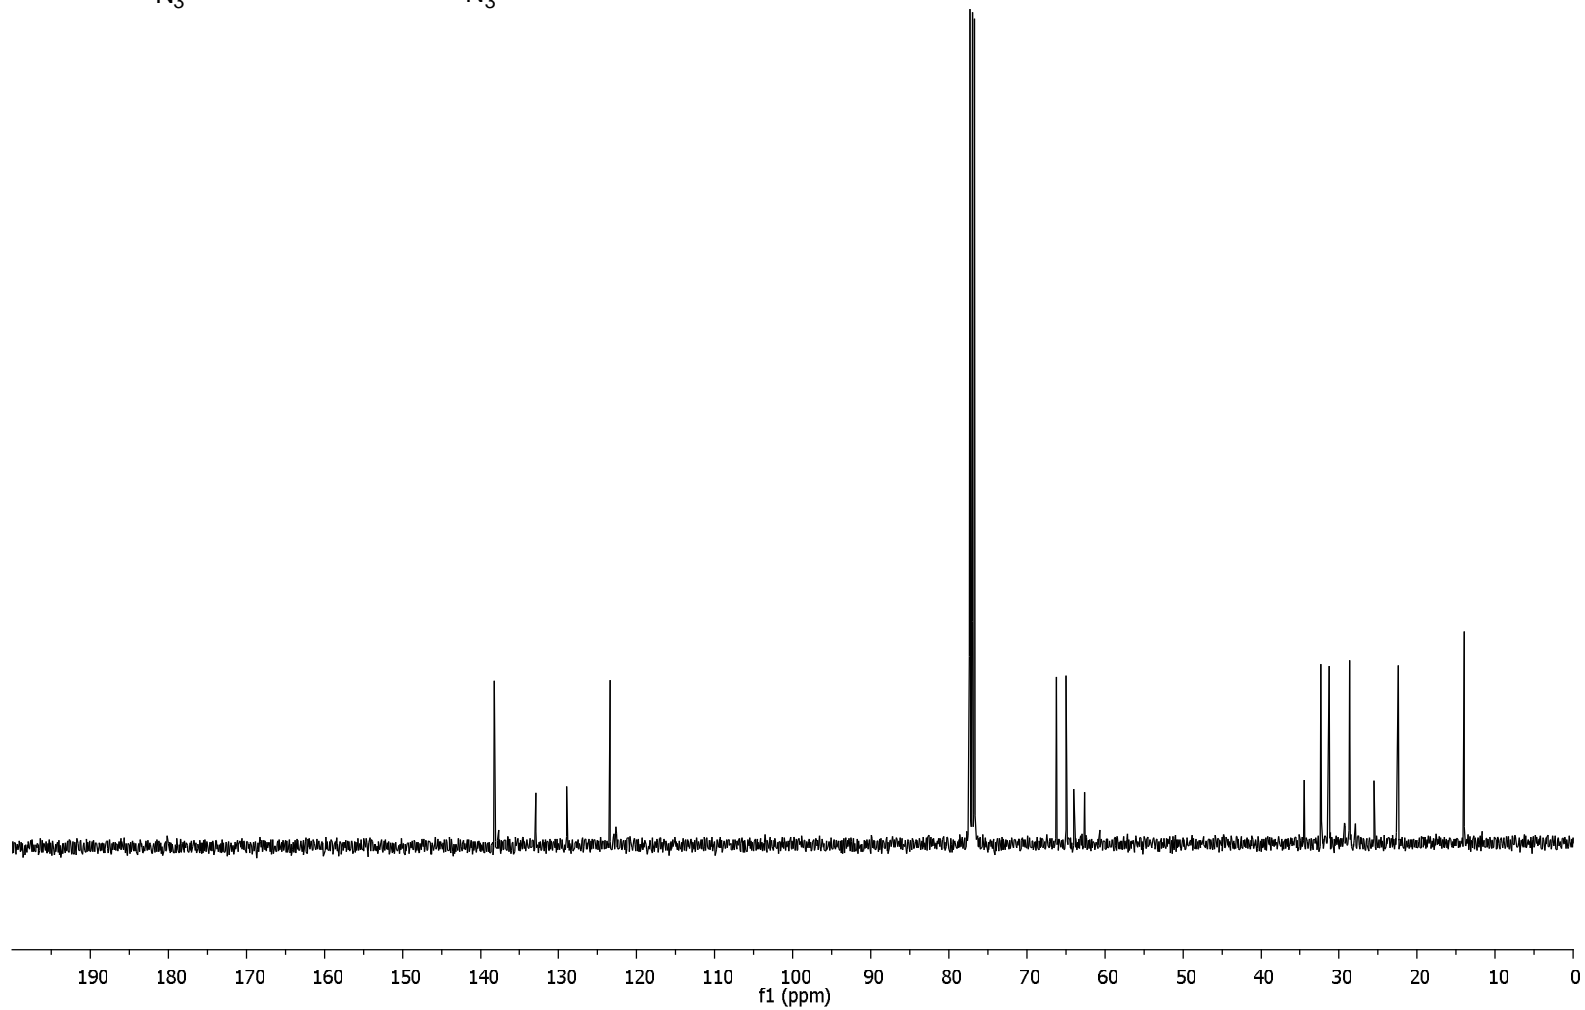

**5a** and **6a**, 100 MHz,  $CDCl_3$

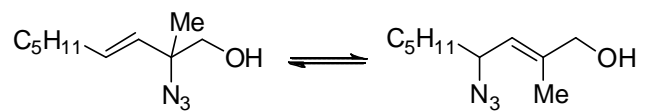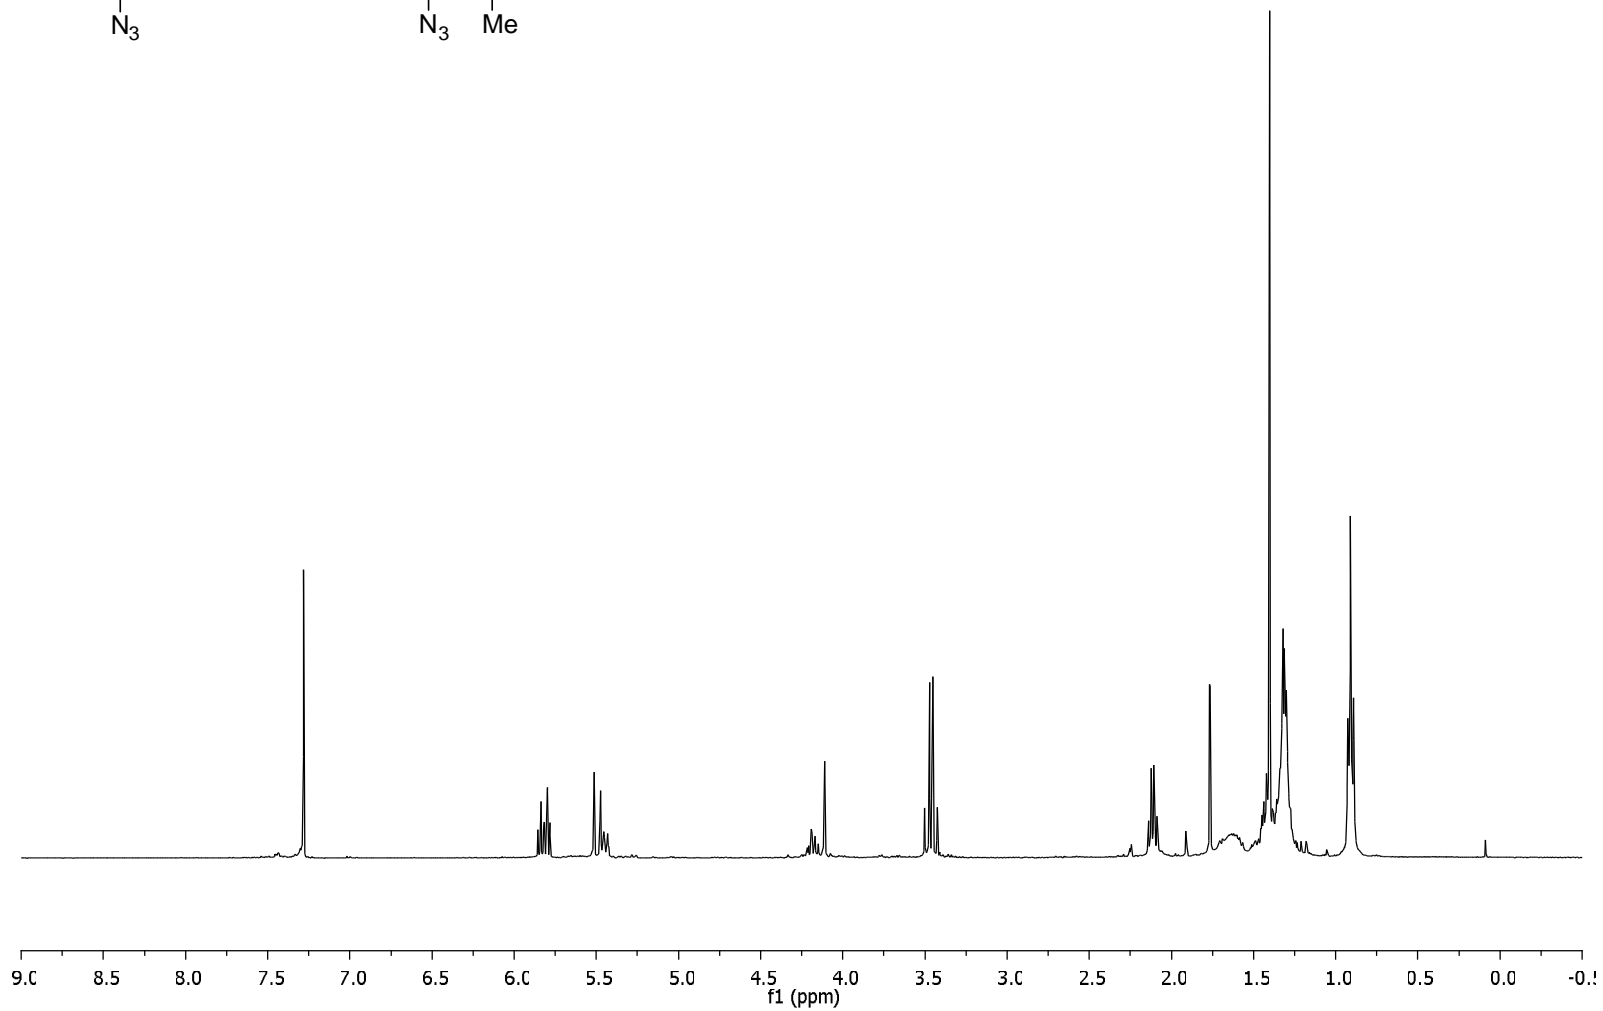

**5b** and **6b**, 400 MHz, CDCl<sub>3</sub>

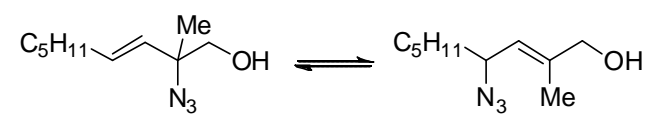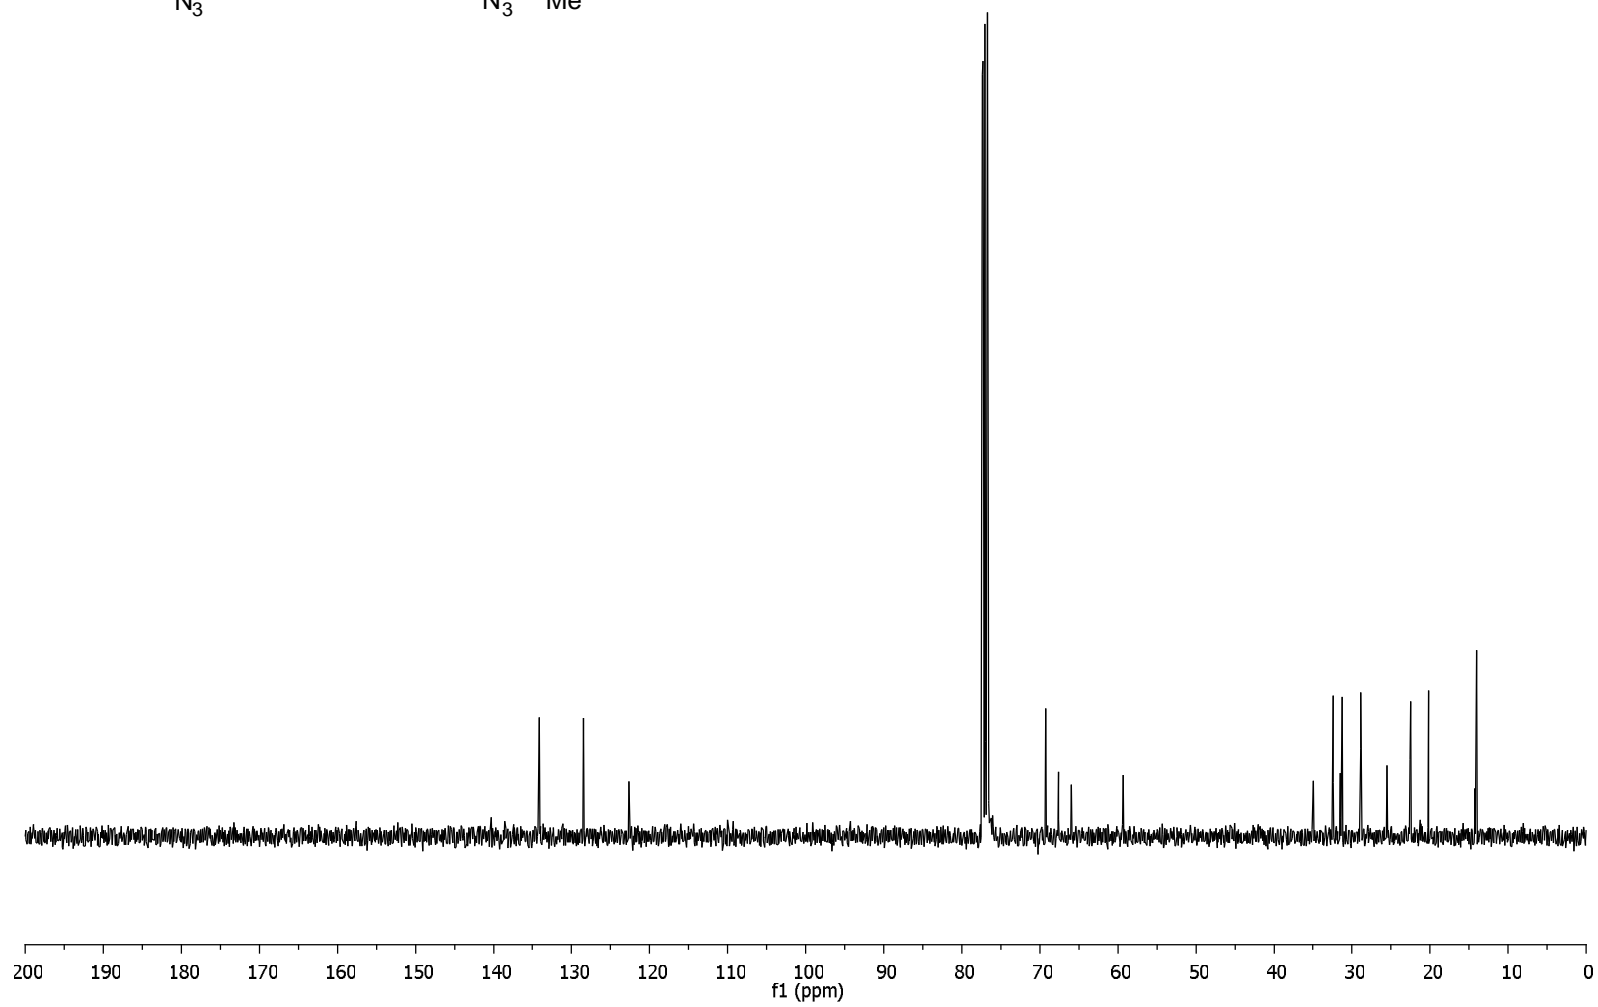

**5b** and **6b**, 100 MHz, CDCl<sub>3</sub>

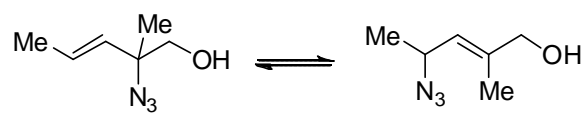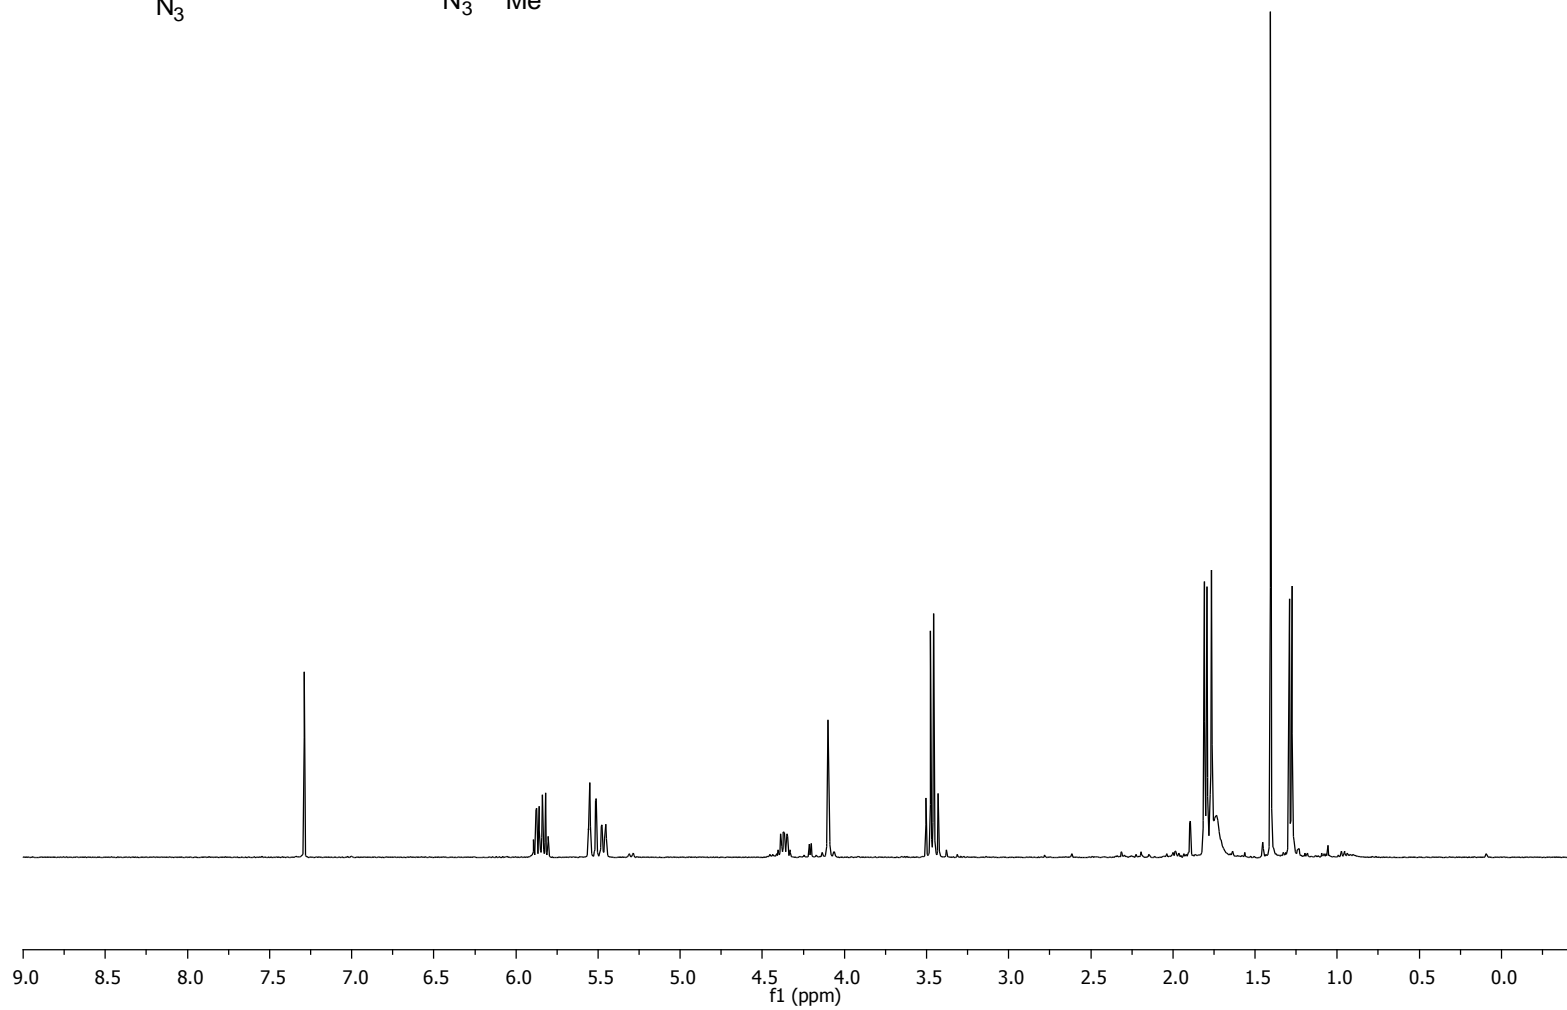

**5c** and **6c**, 400 MHz,  $\text{CDCl}_3$

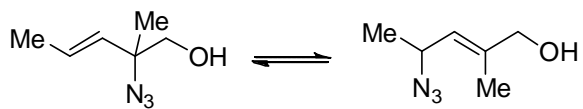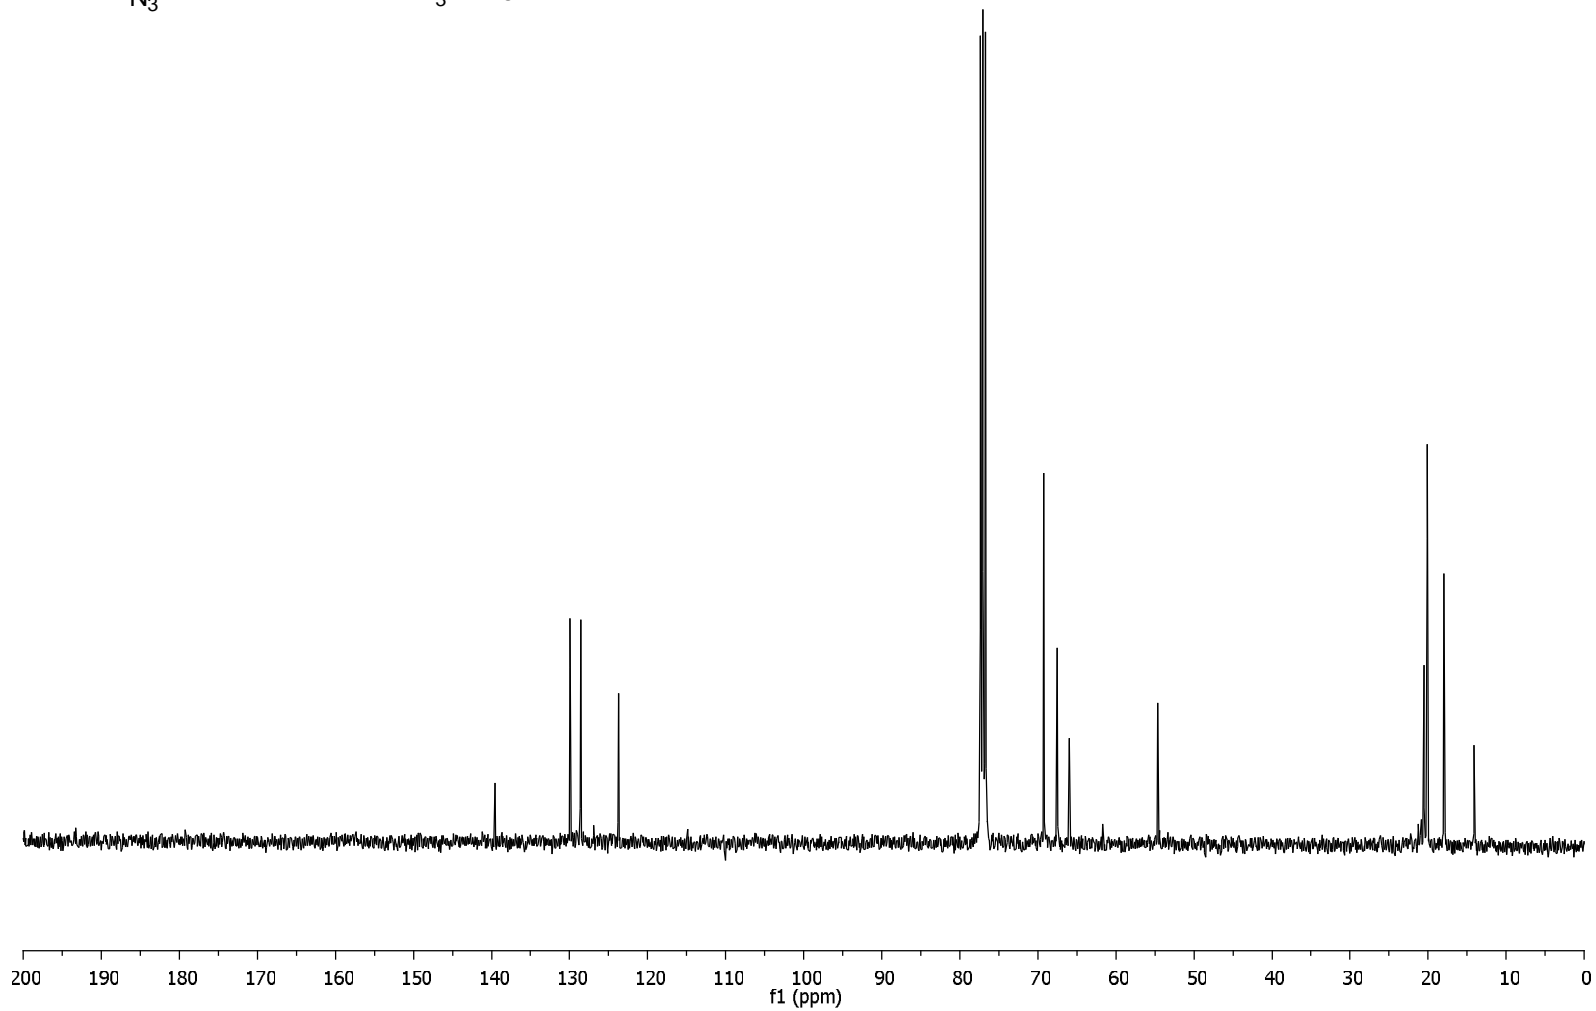

**5c** and **6c**, 100 MHz, CDCl<sub>3</sub>

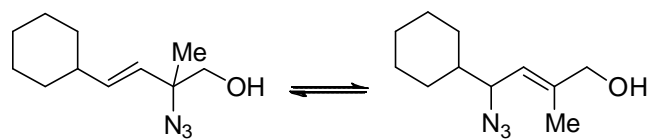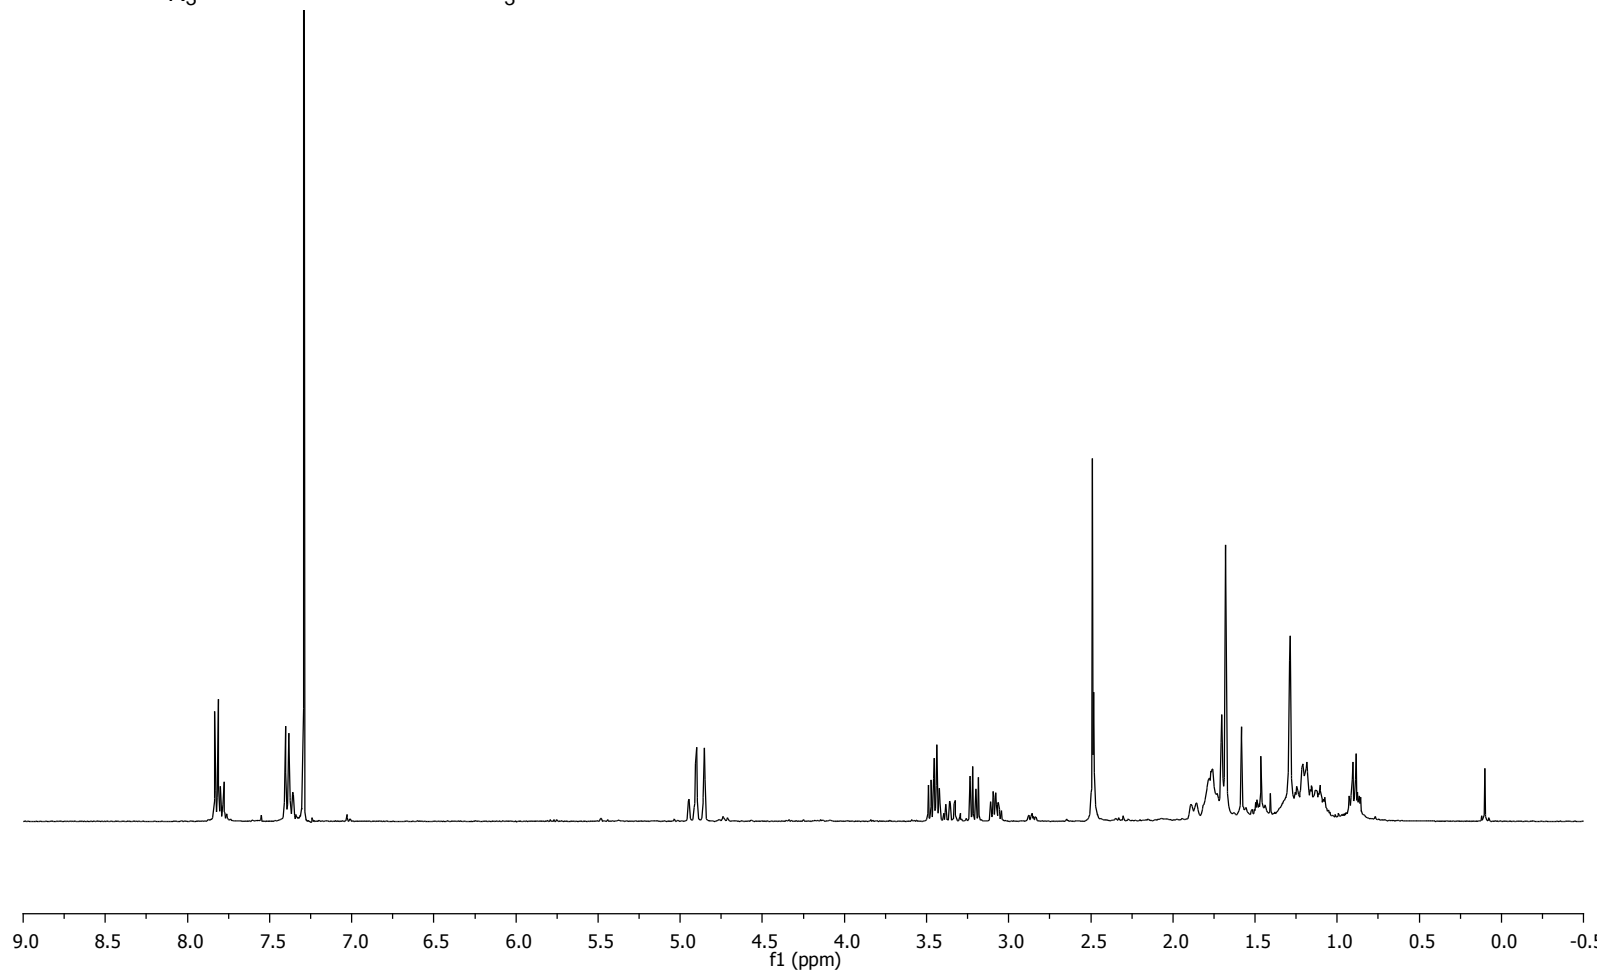

**5d** and **6d**, 400 MHz, CDCl<sub>3</sub>

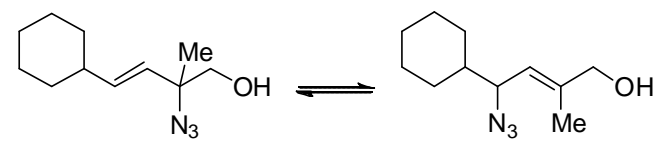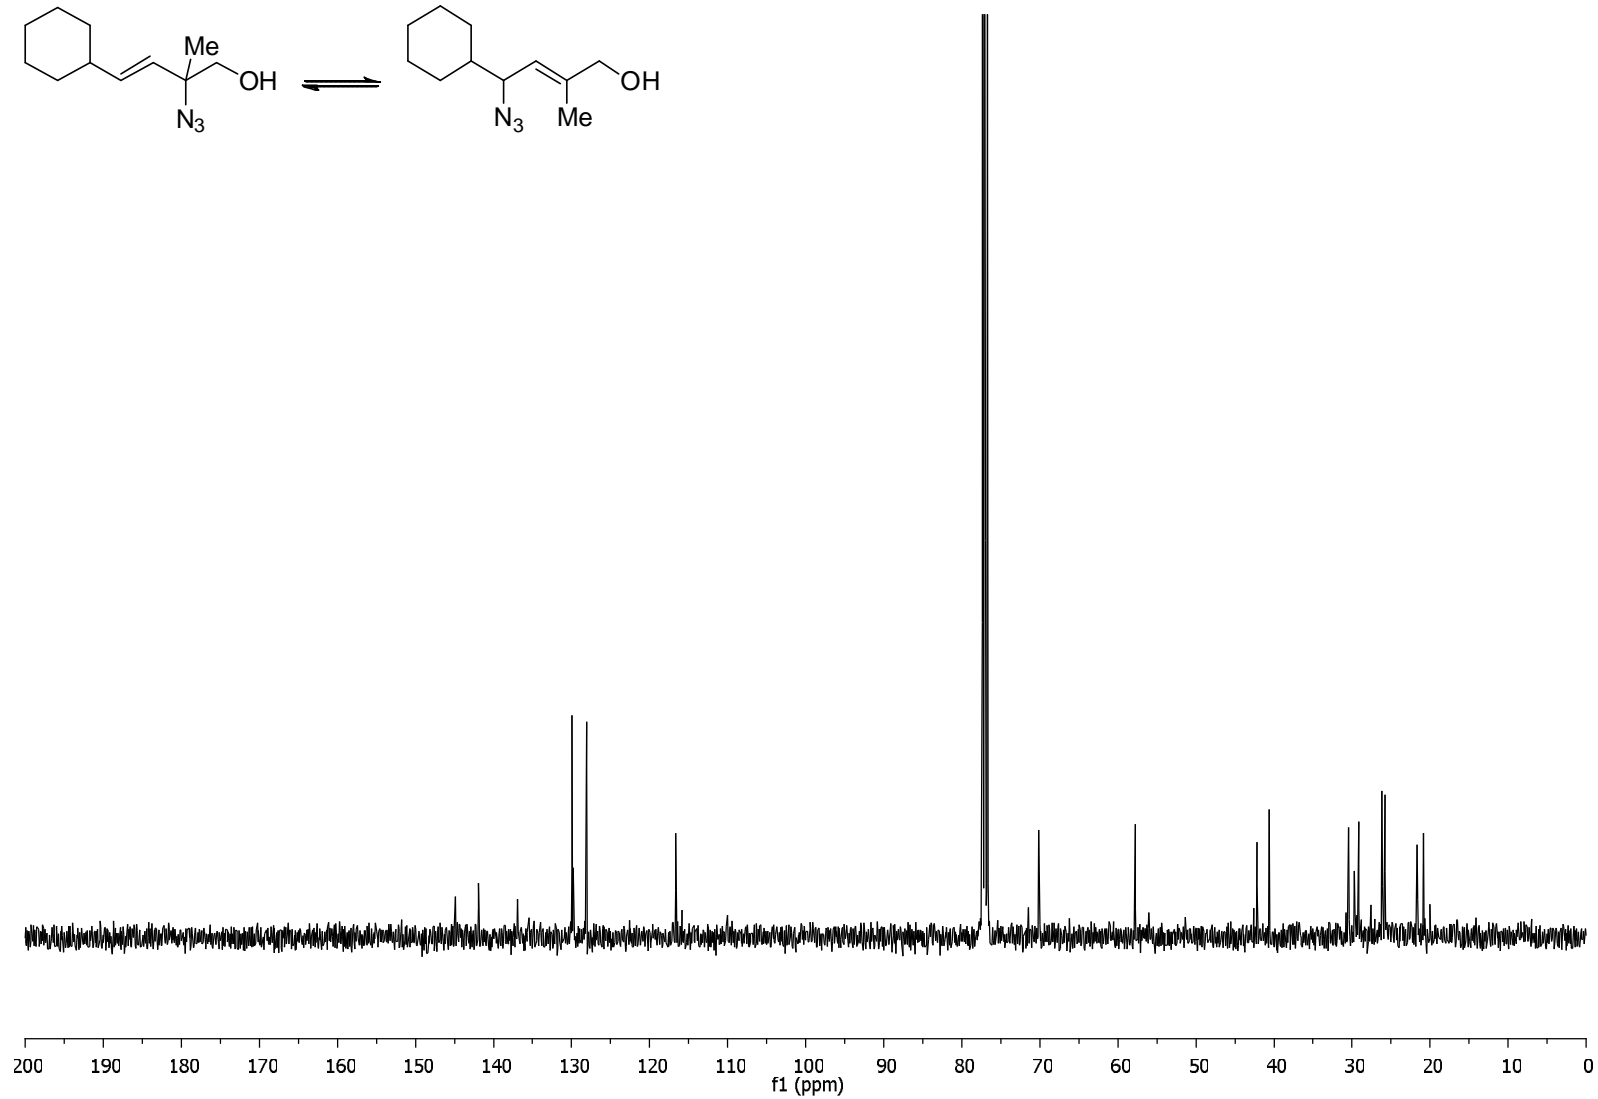

**5d** and **6d**, 100 MHz, CDCl<sub>3</sub>



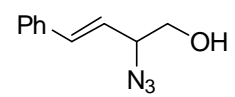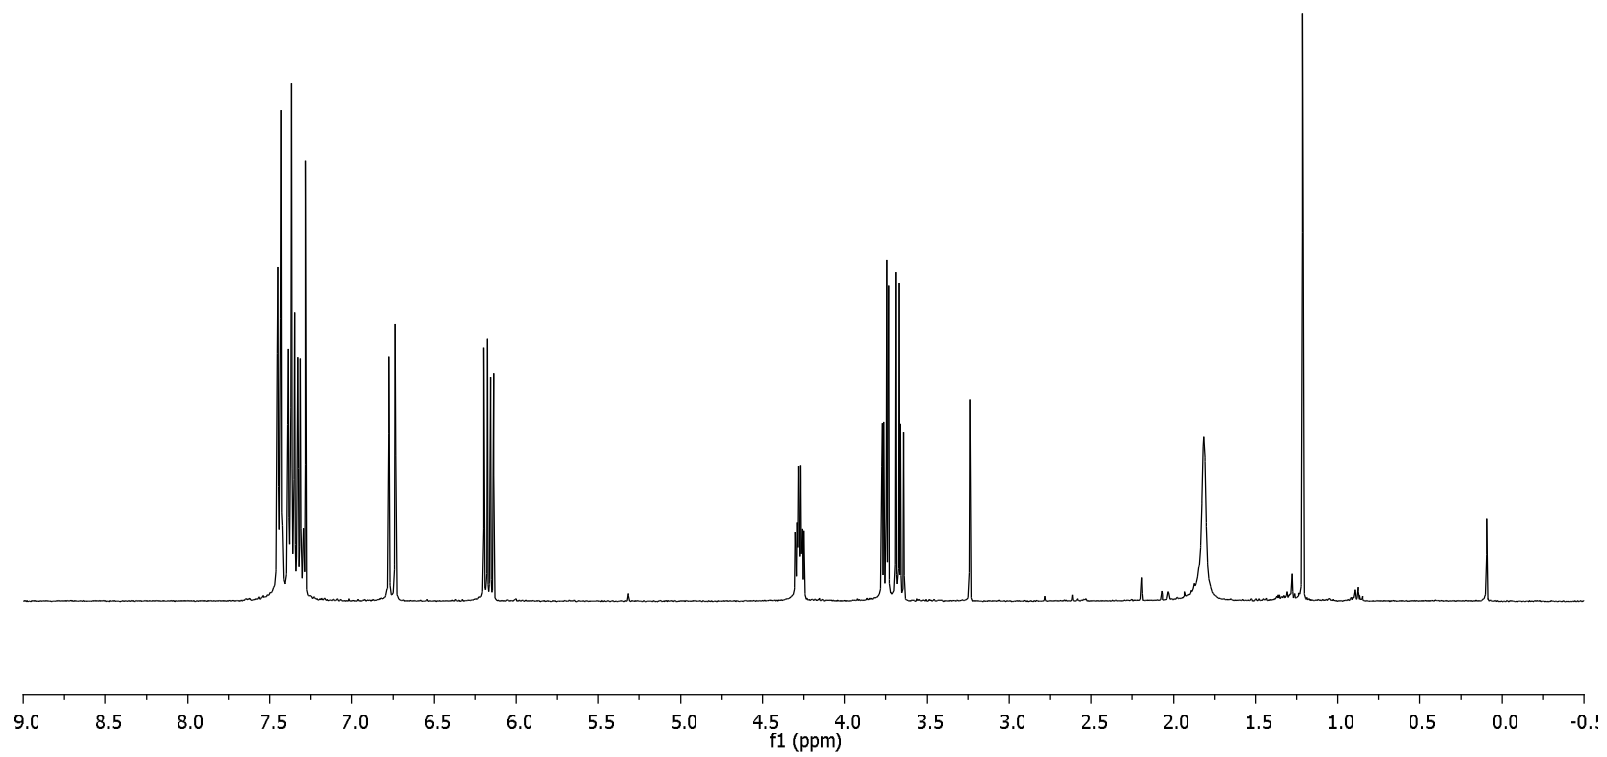

**5e**, 400 MHz, CDCl<sub>3</sub>

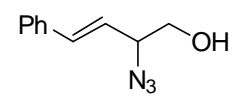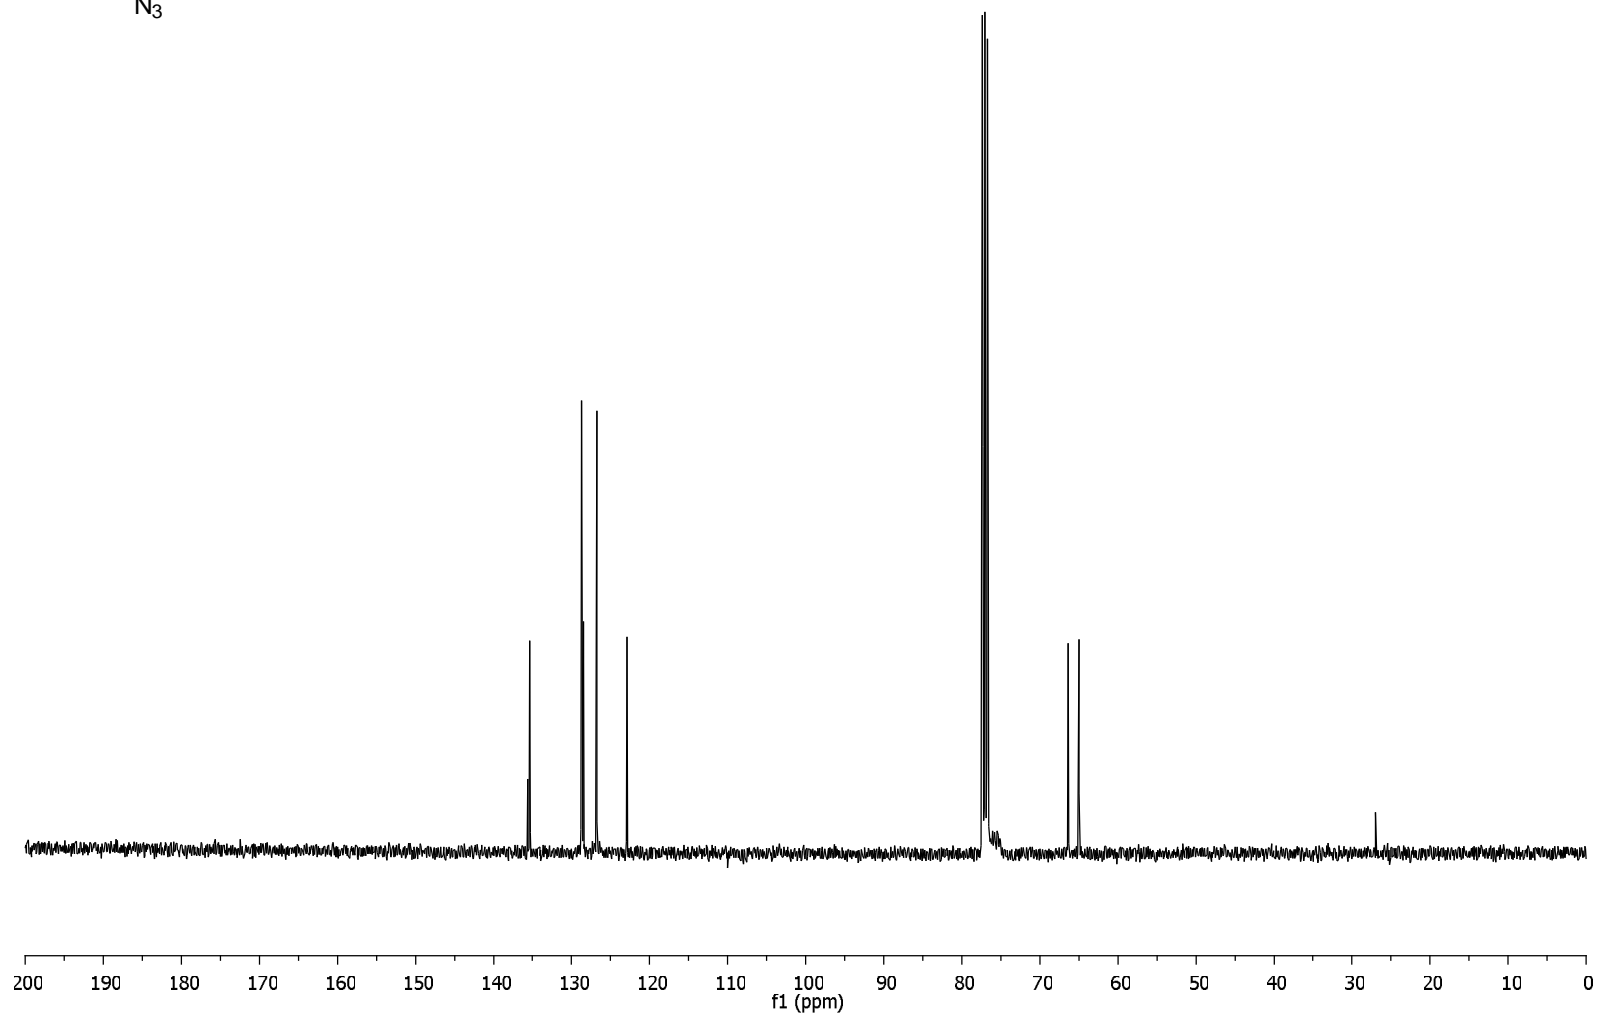

**5e**, 100 MHz, CDCl<sub>3</sub>

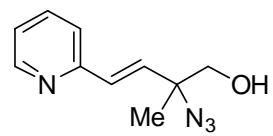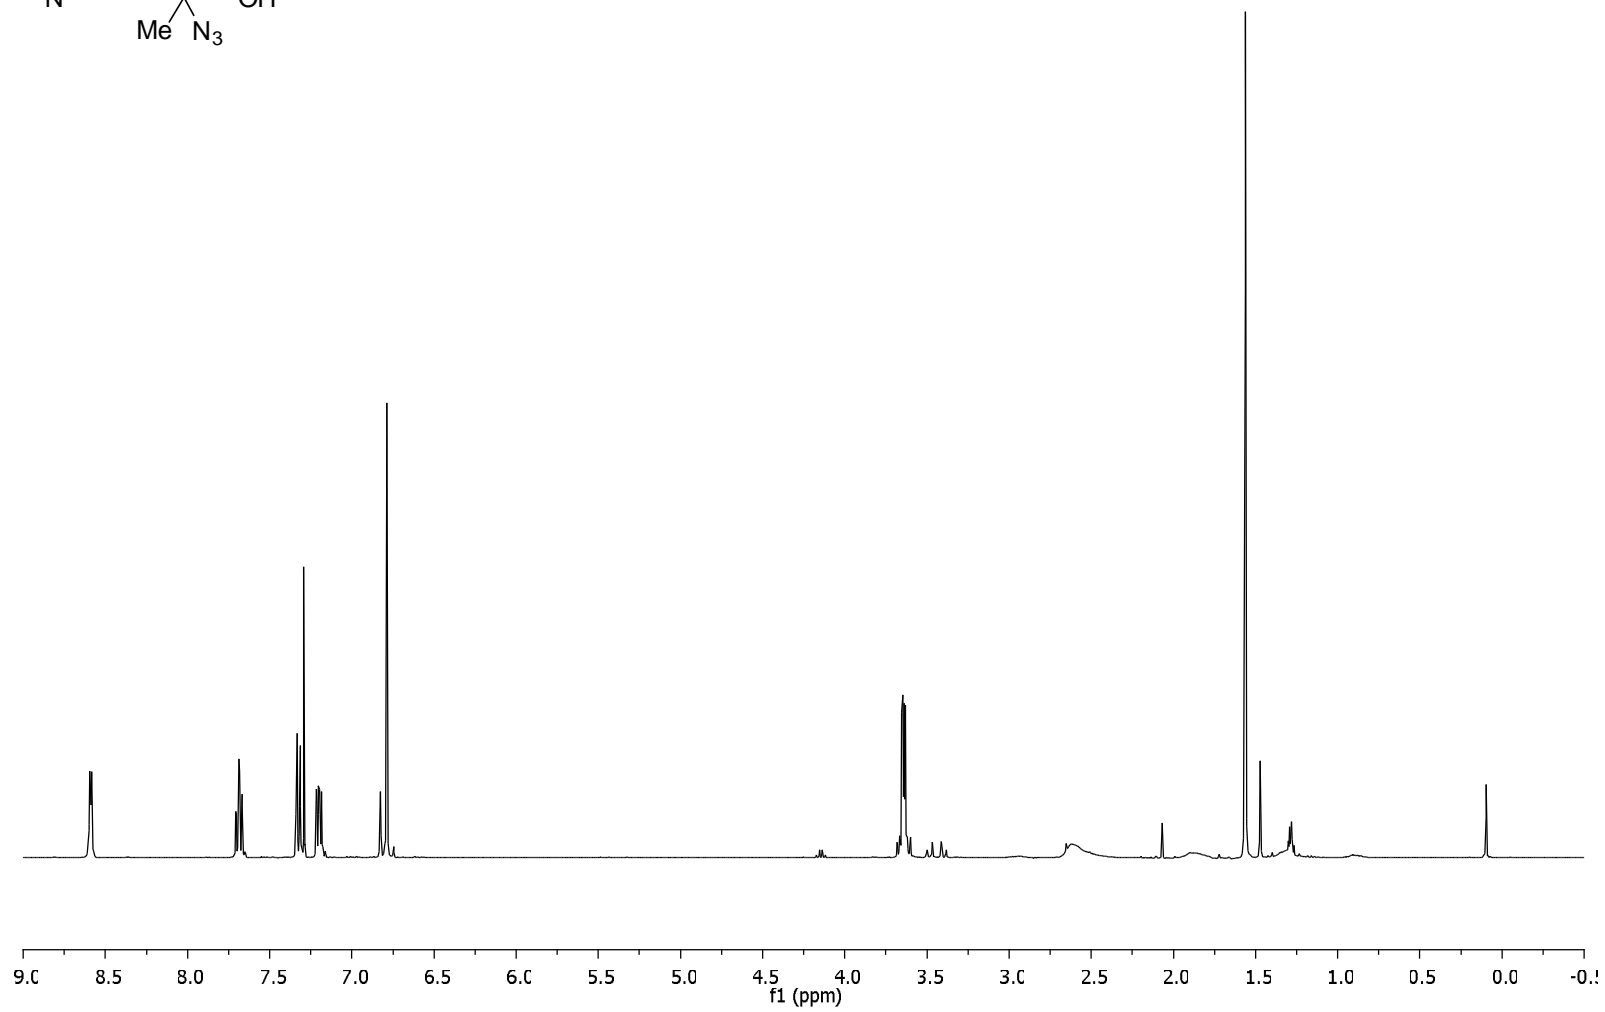

**5f**, 400 MHz, CDCl<sub>3</sub>

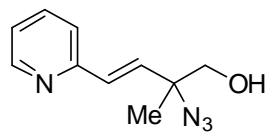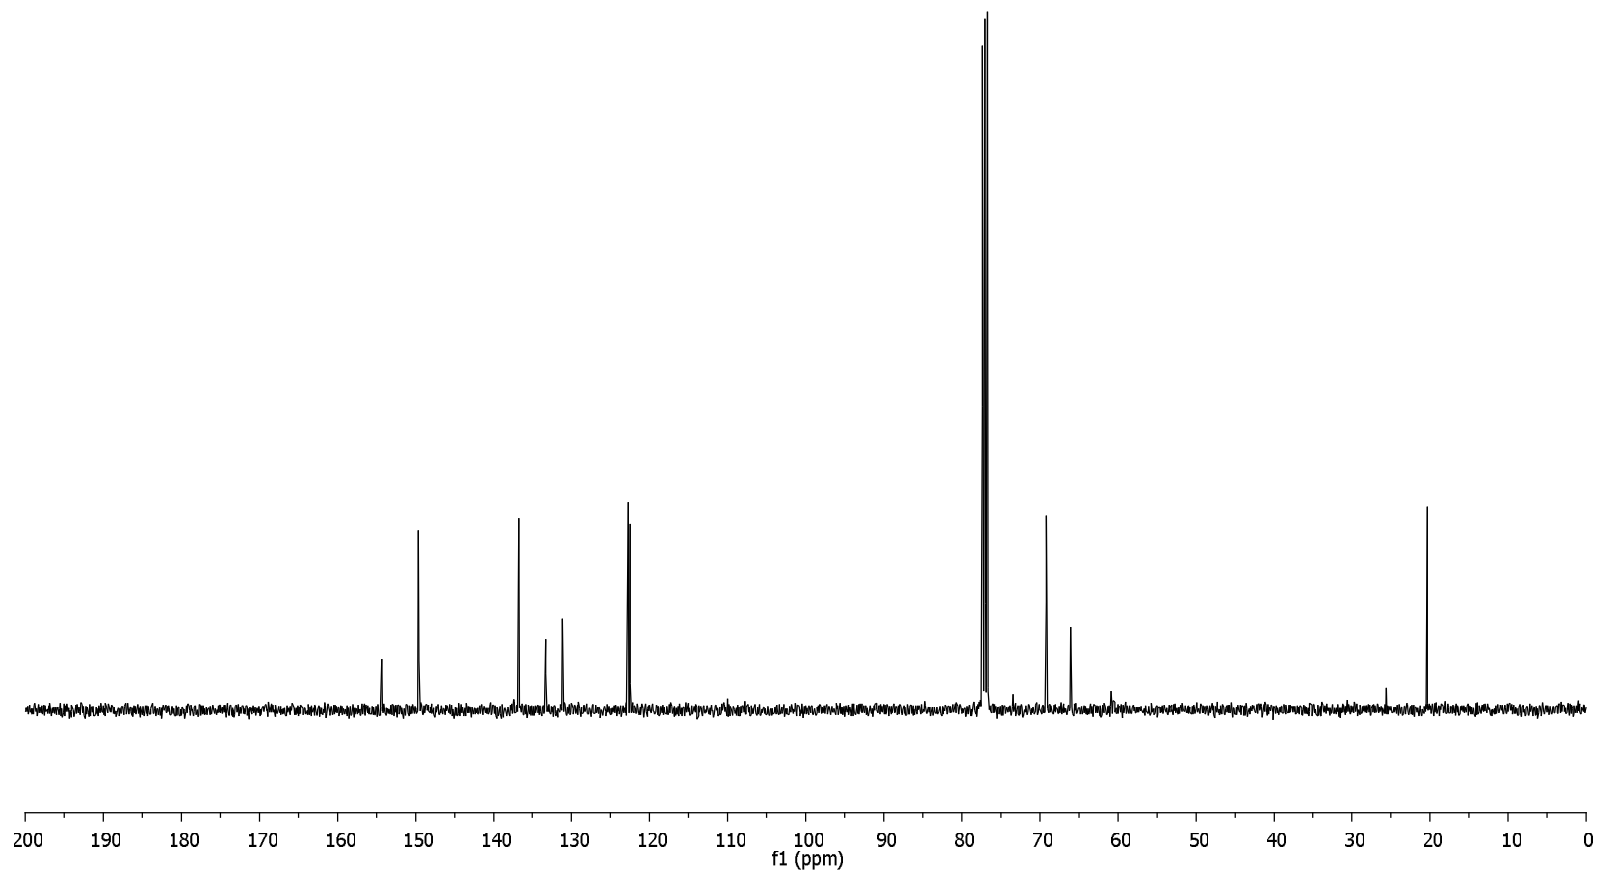

5f, 100 MHz, CDCl<sub>3</sub>

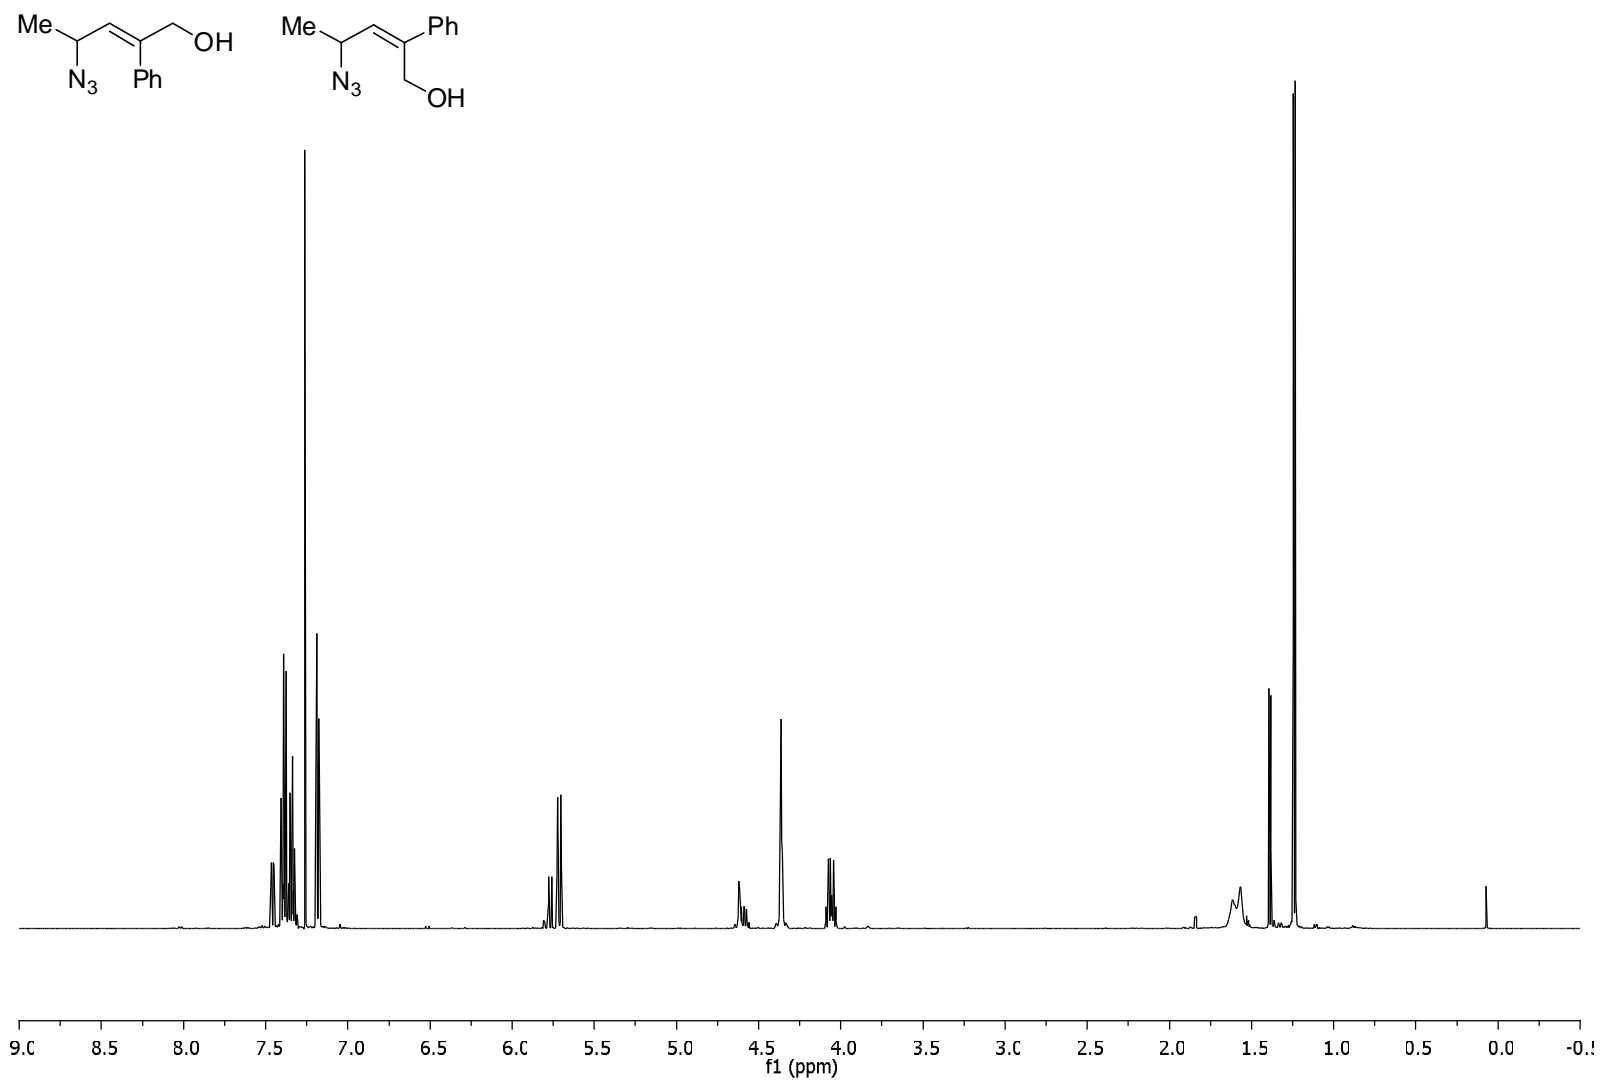

*E*-6g and *Z*-6g, 400 MHz, CDCl<sub>3</sub>

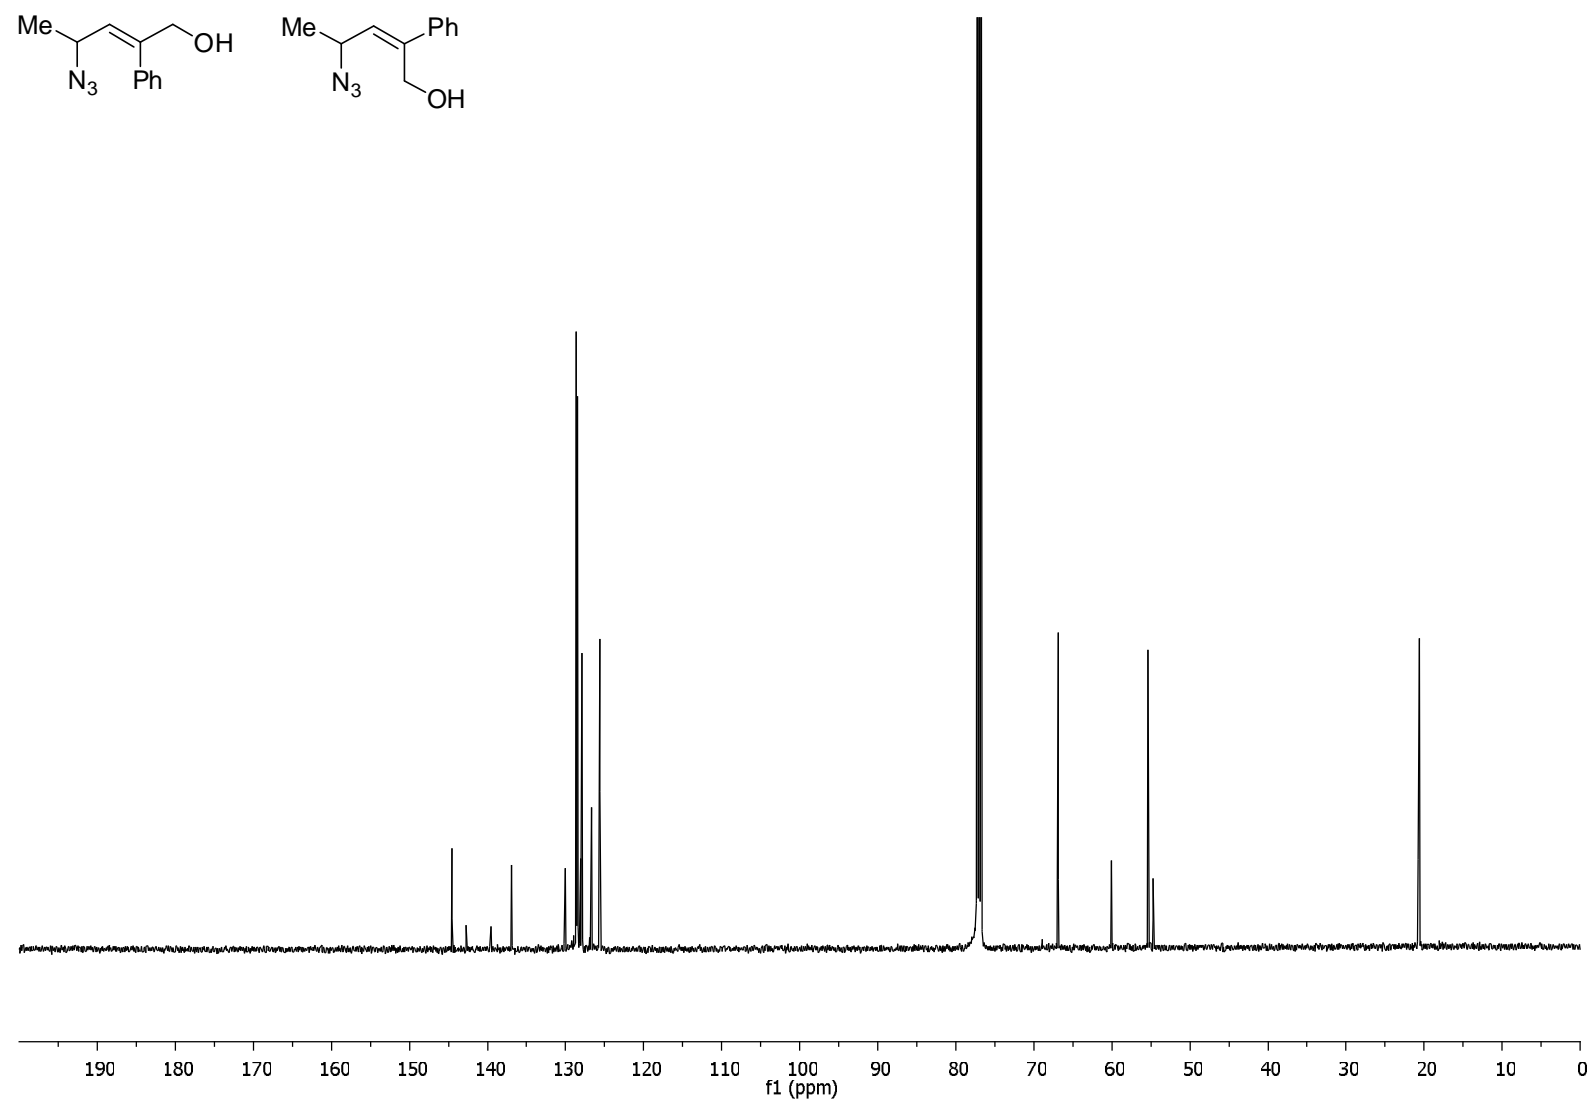

*E*-6g and *Z*-6g, 100 MHz, CDCl<sub>3</sub>

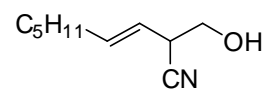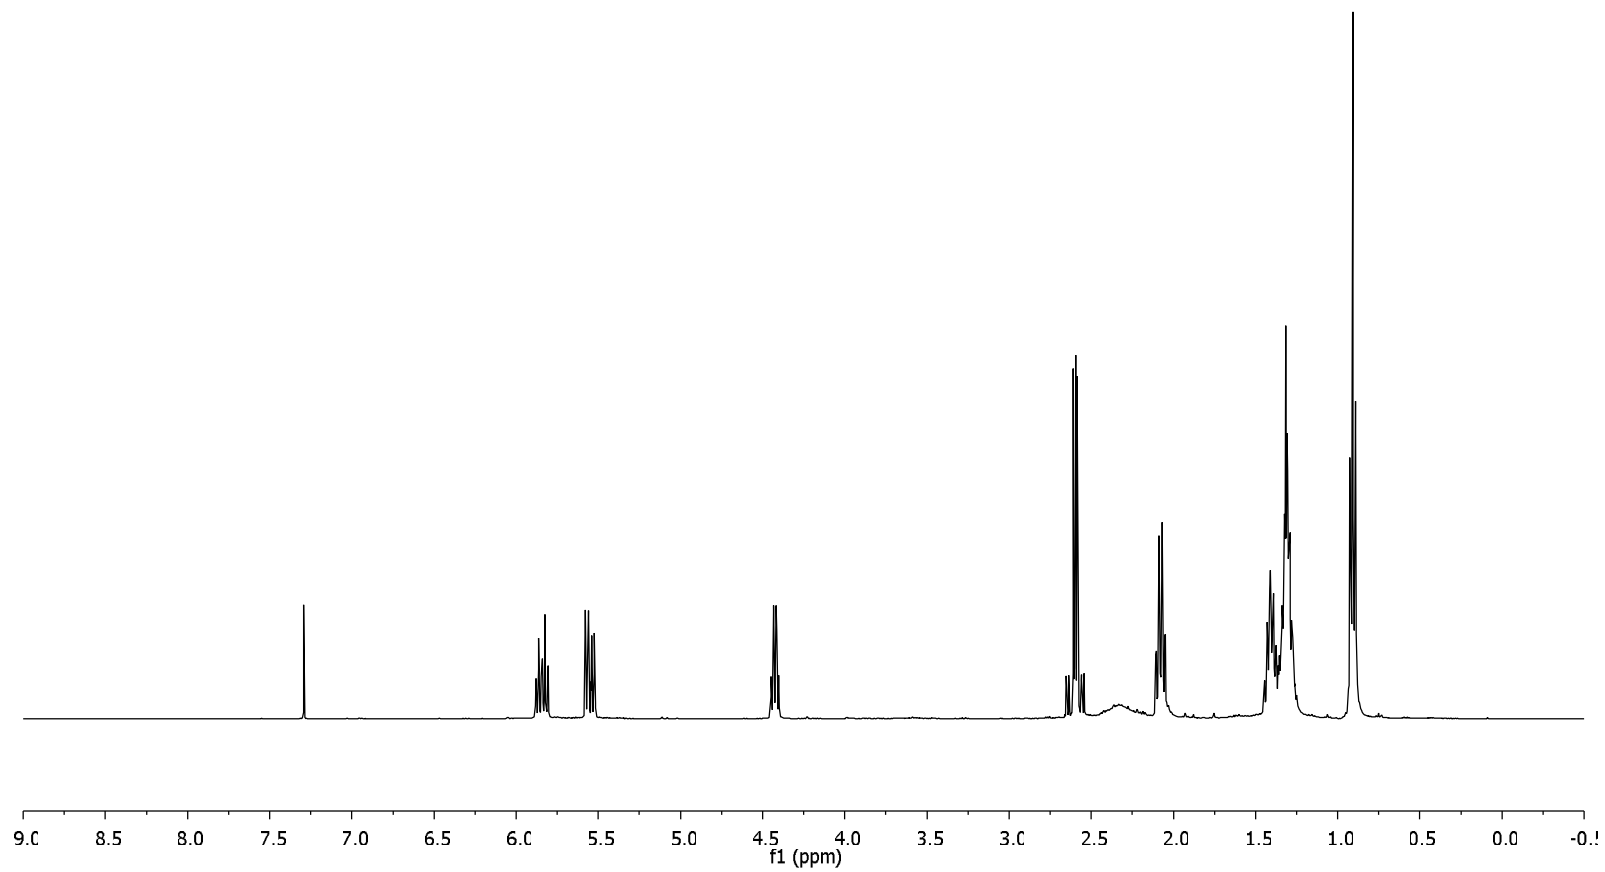

7, 400 MHz, CDCl<sub>3</sub>

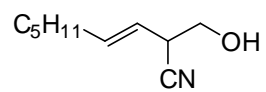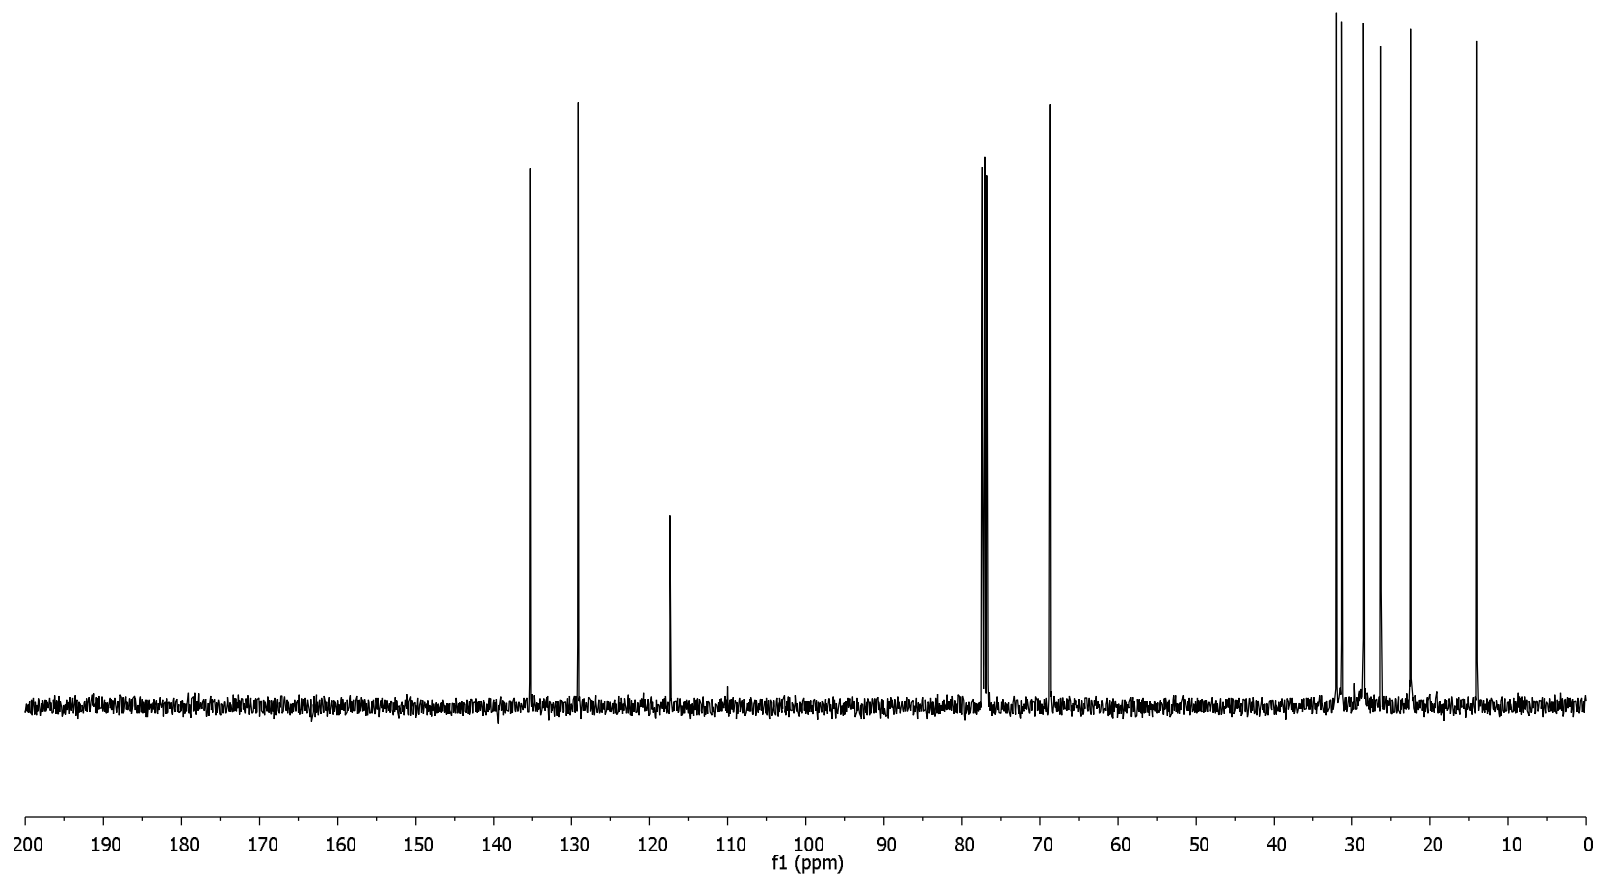

7, 100 MHz, CDCl<sub>3</sub>



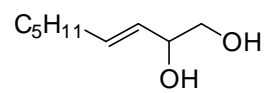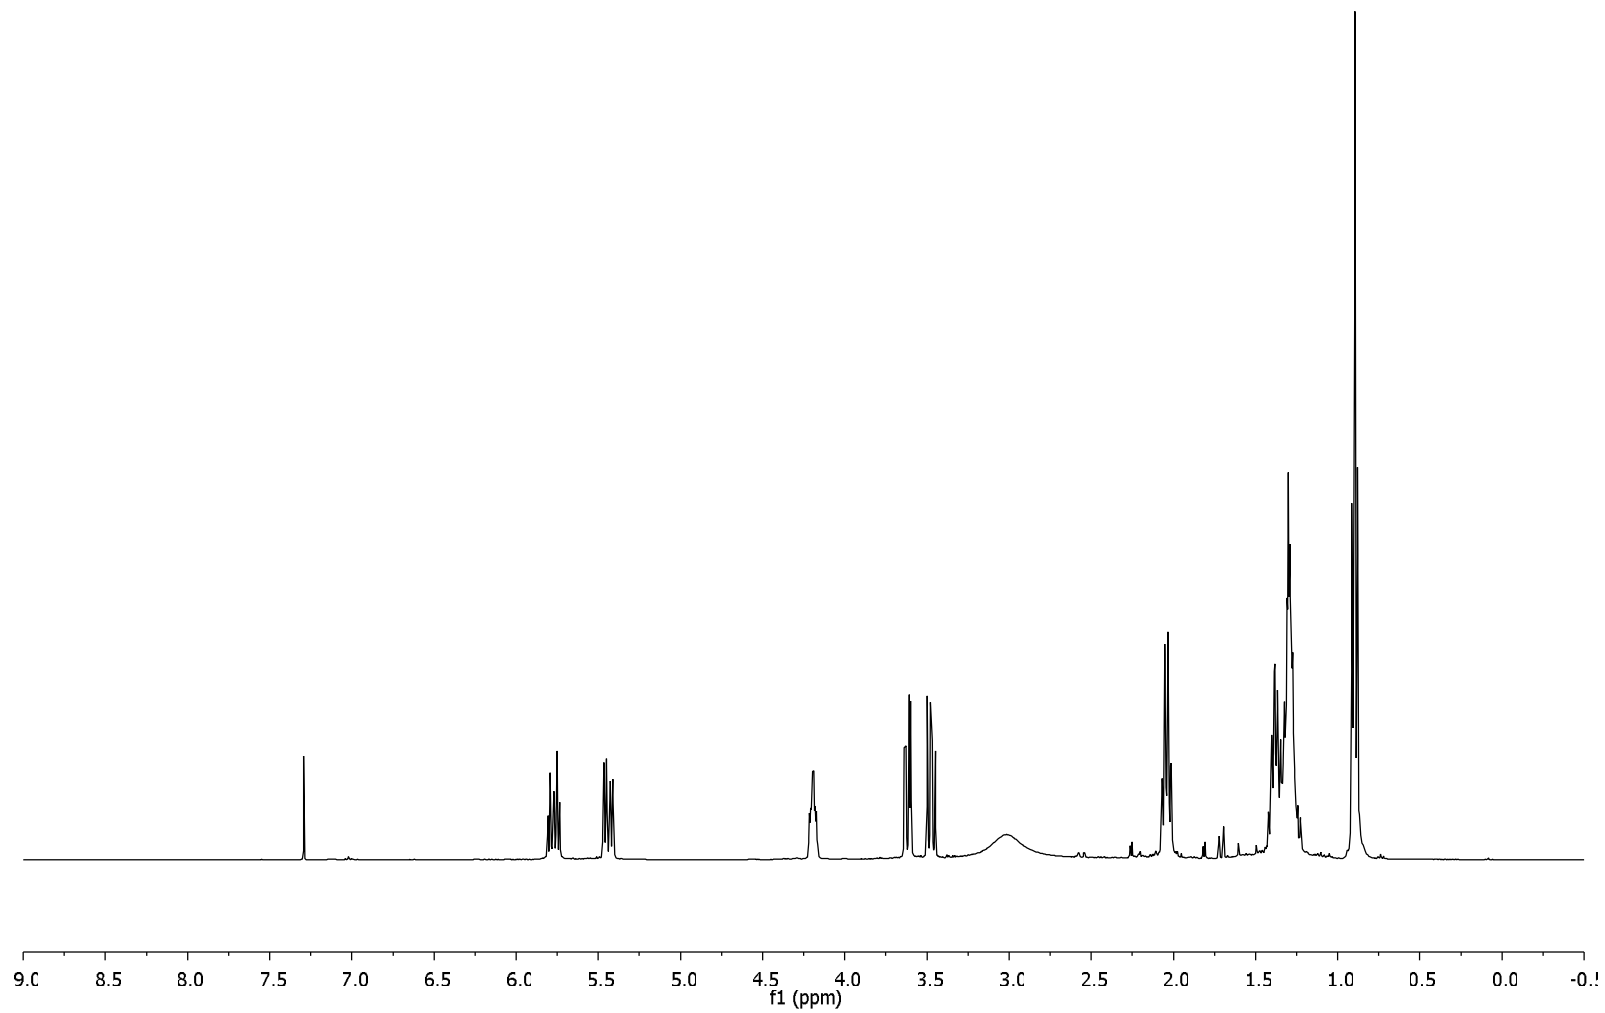

**8**, 400 MHz,  $\text{CDCl}_3$

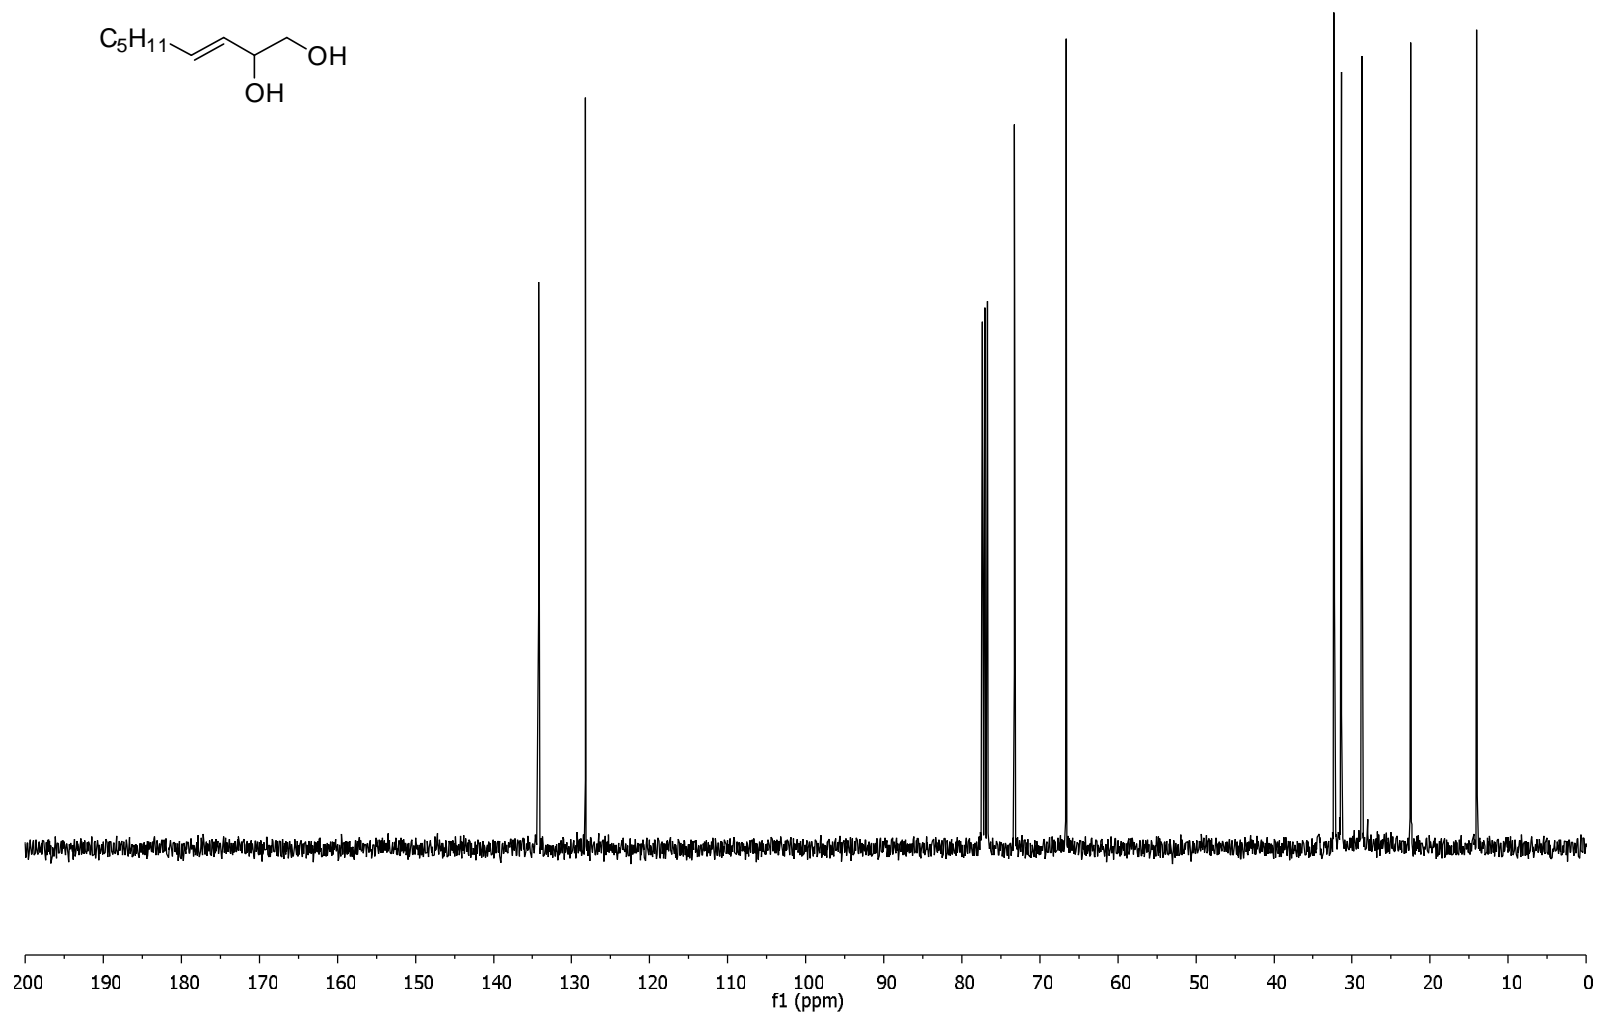

**8**, 100 MHz, CDCl<sub>3</sub>

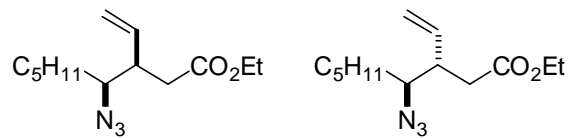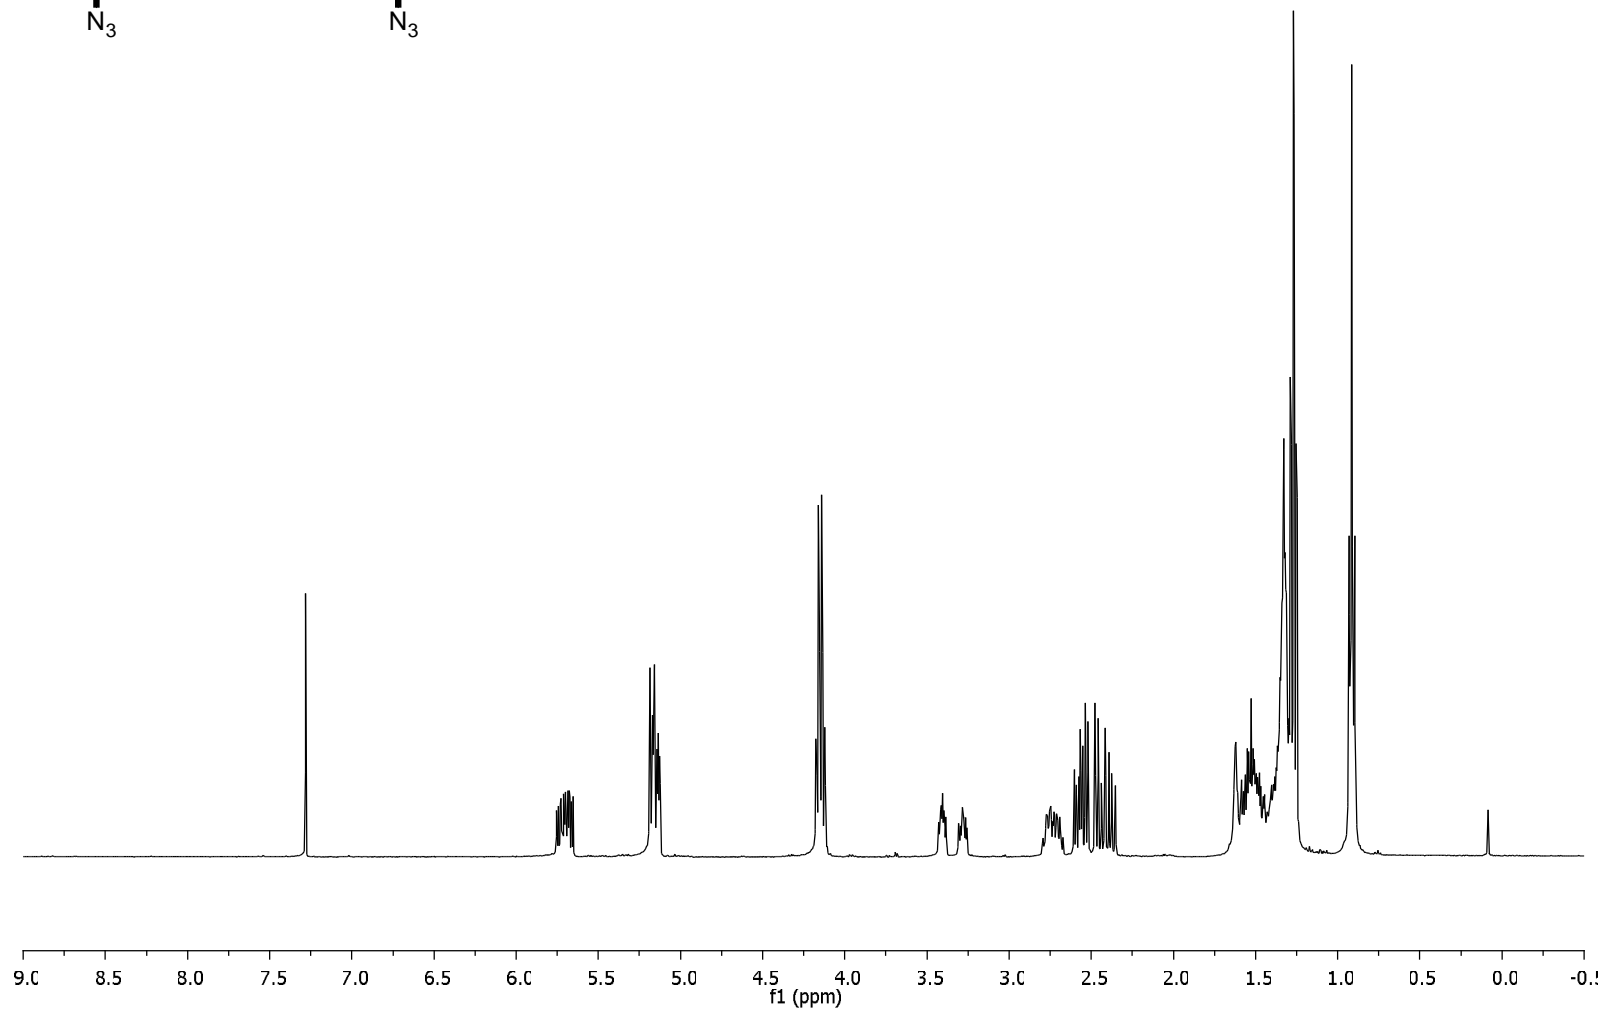

*syn*- and *anti*-9a, 400 MHz, CDCl<sub>3</sub>

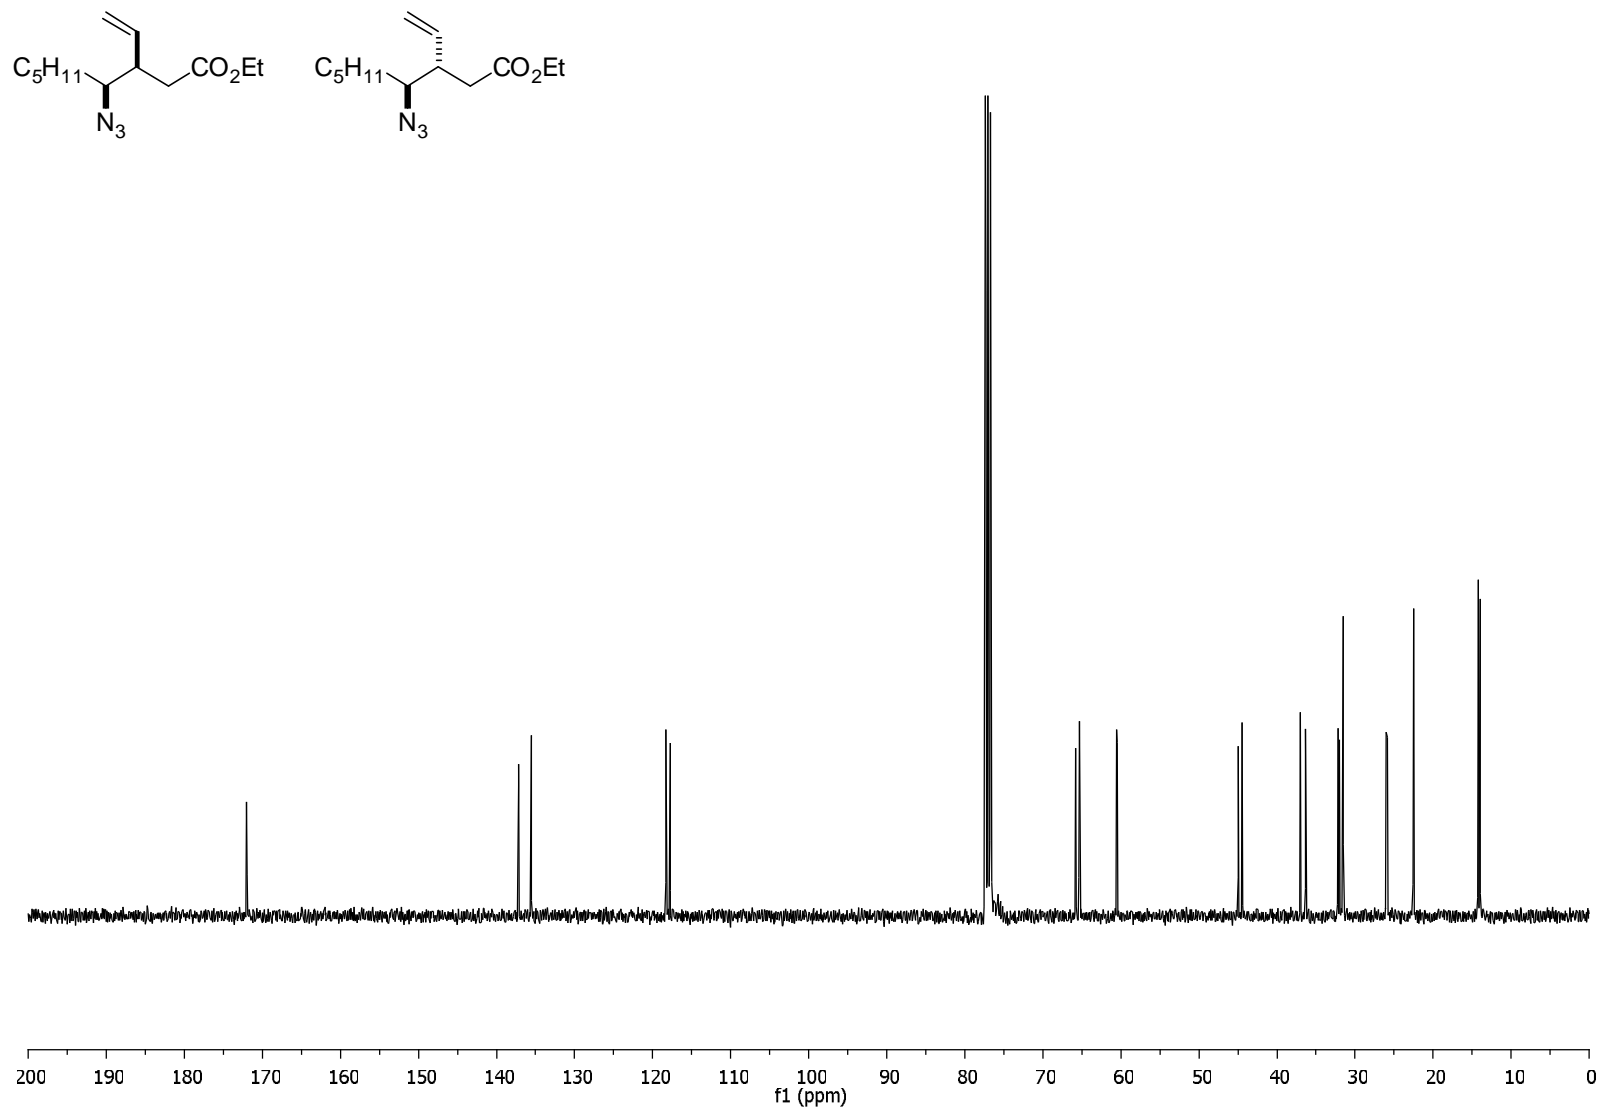

*syn*- and *anti*-**9a**, 100 MHz, CDCl<sub>3</sub>

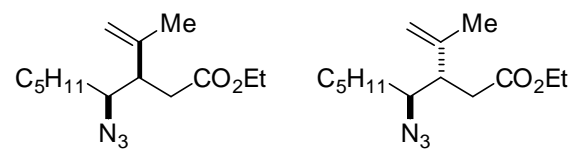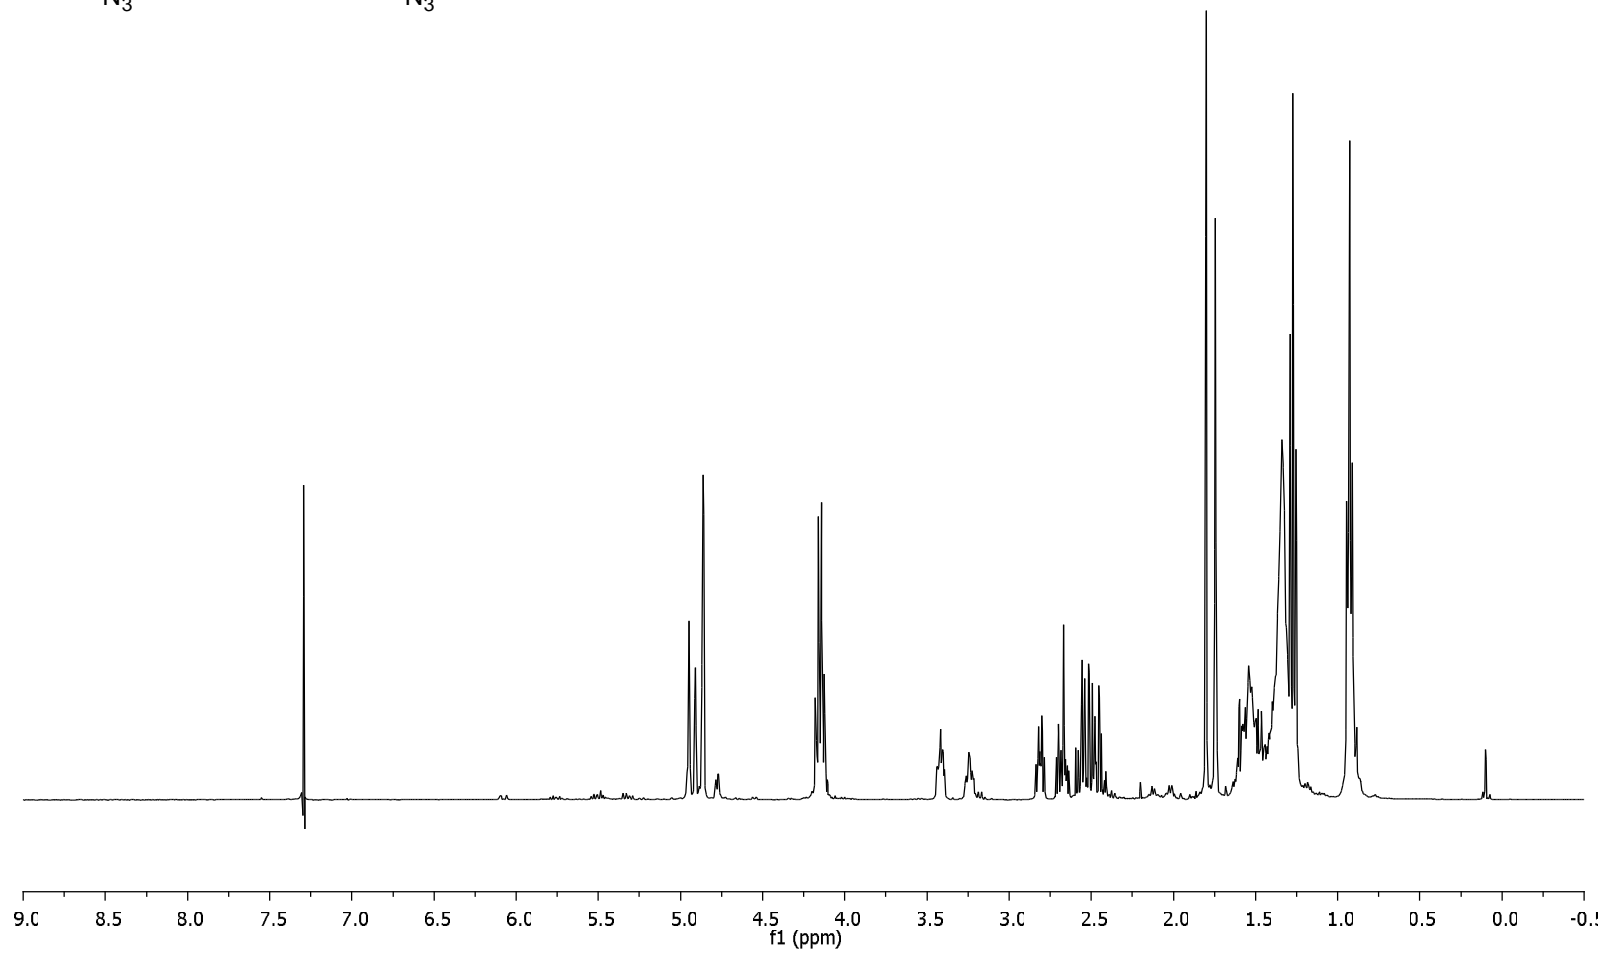

*syn*- and *anti*-**9b**, 400 MHz, CDCl<sub>3</sub>

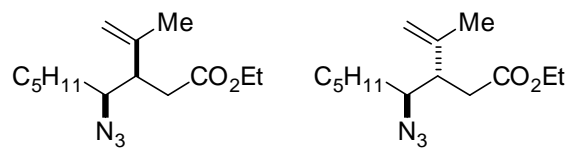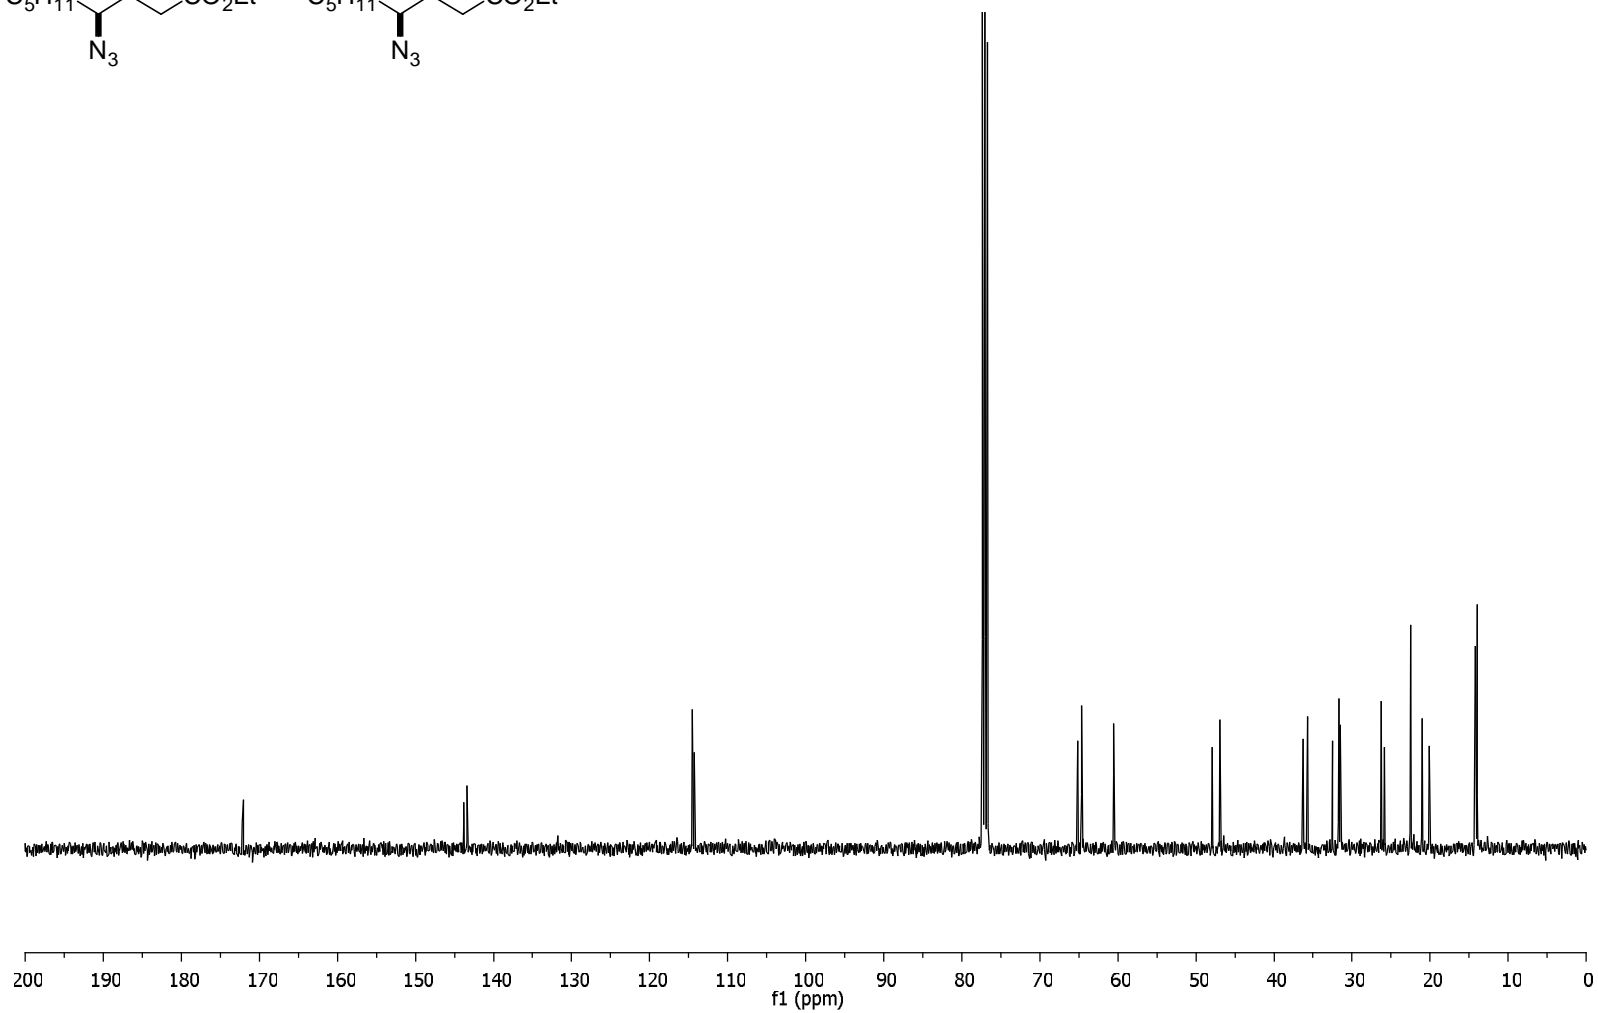

*syn*- and *anti*-**9b**, 100 MHz, CDCl<sub>3</sub>

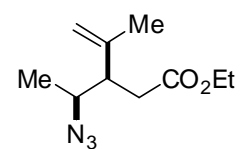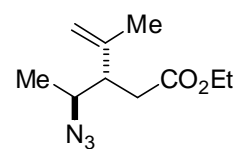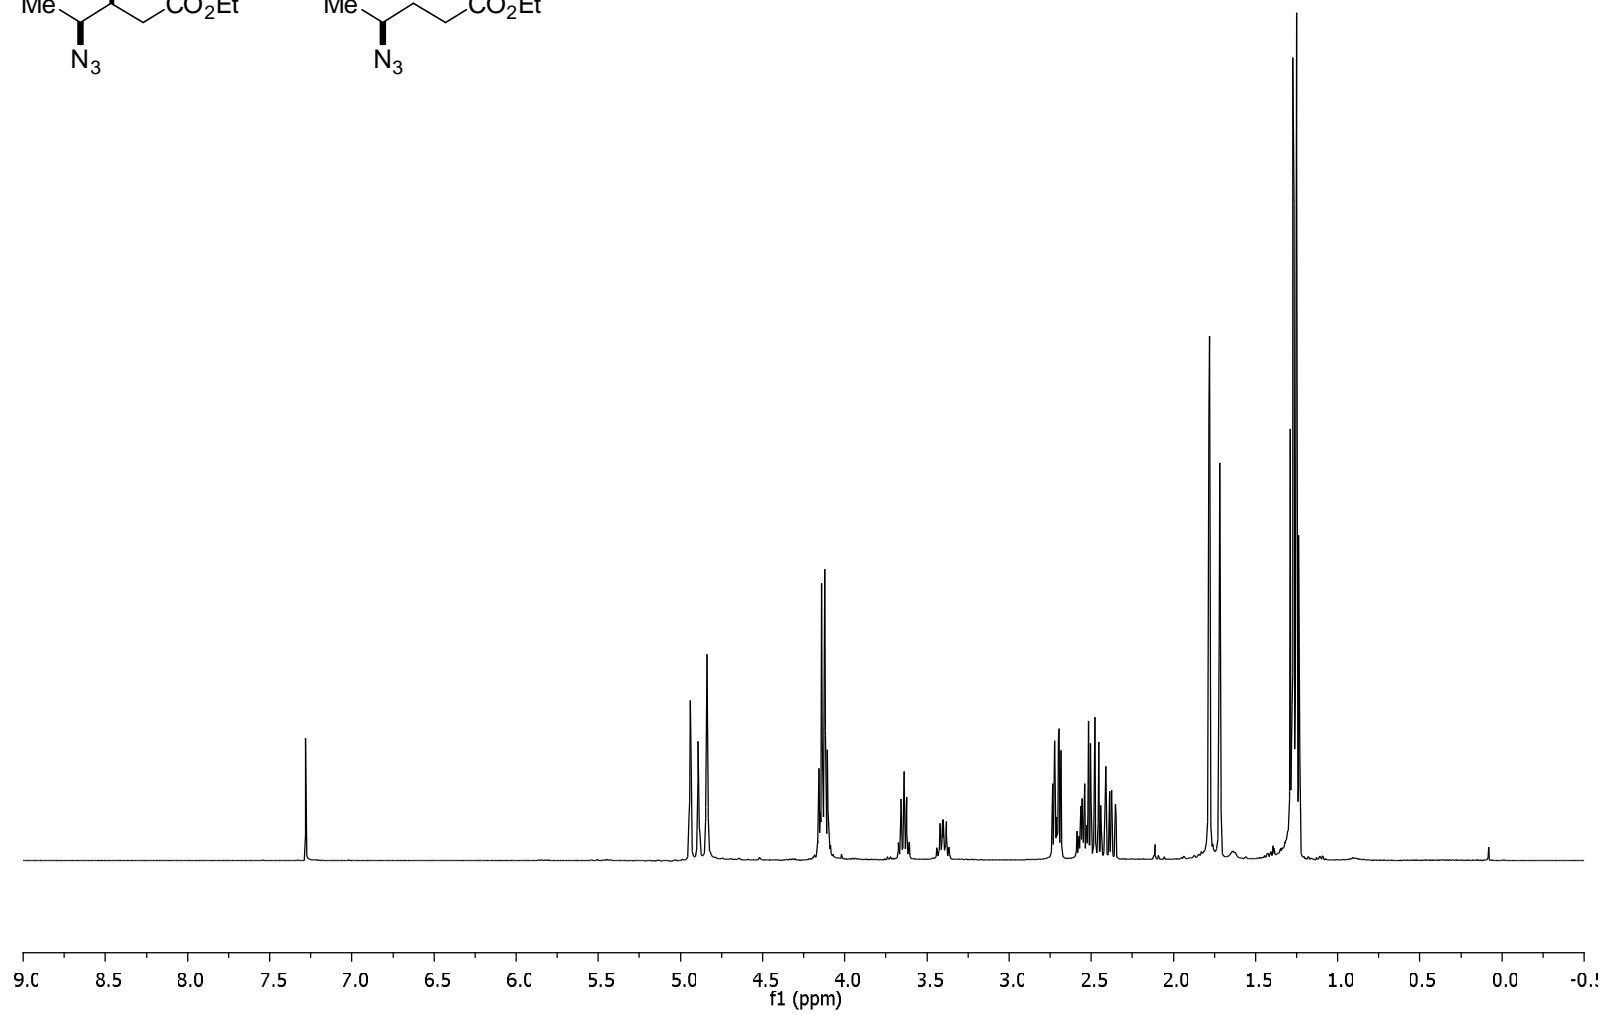

*syn*- and *anti*-9c, 400 MHz, CDCl<sub>3</sub>

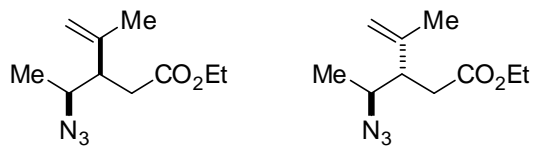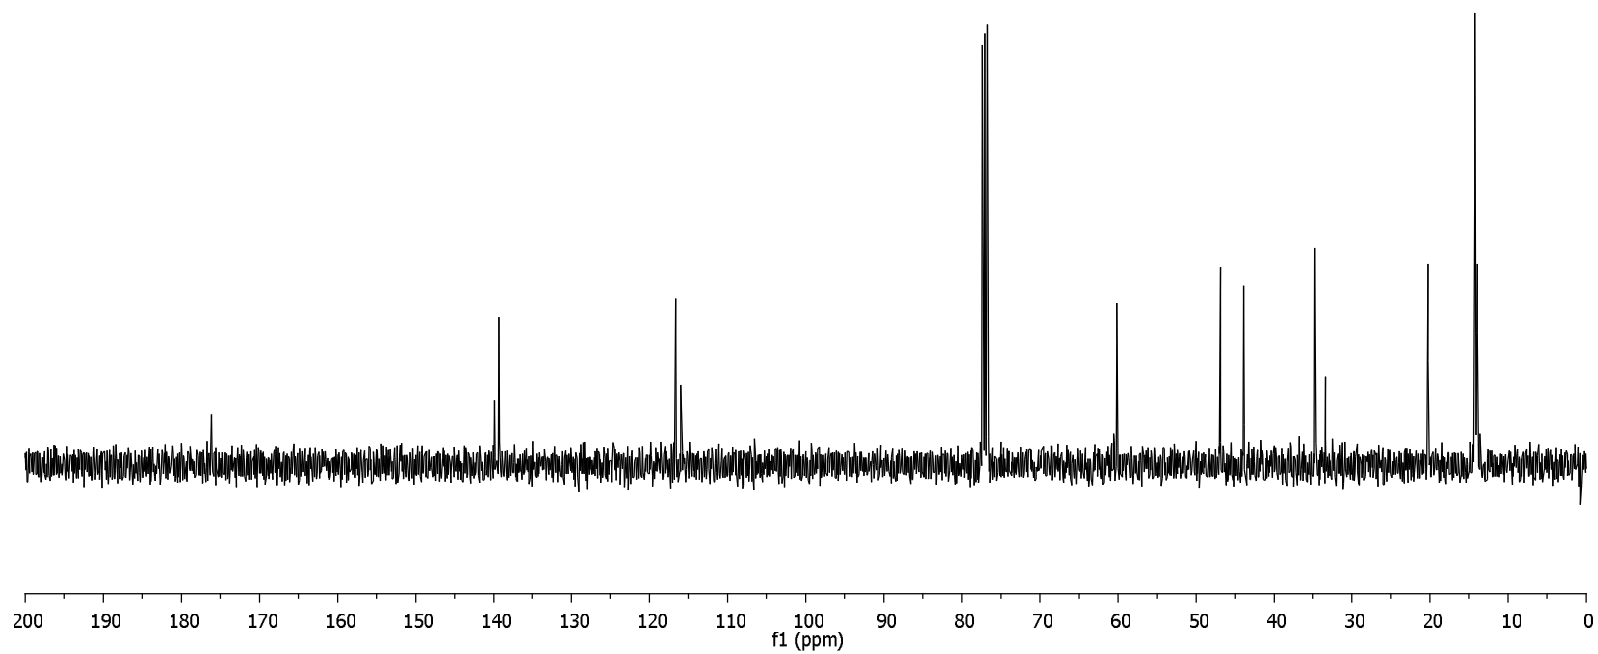

*syn*- and *anti*-9c, 100 MHz, CDCl<sub>3</sub>



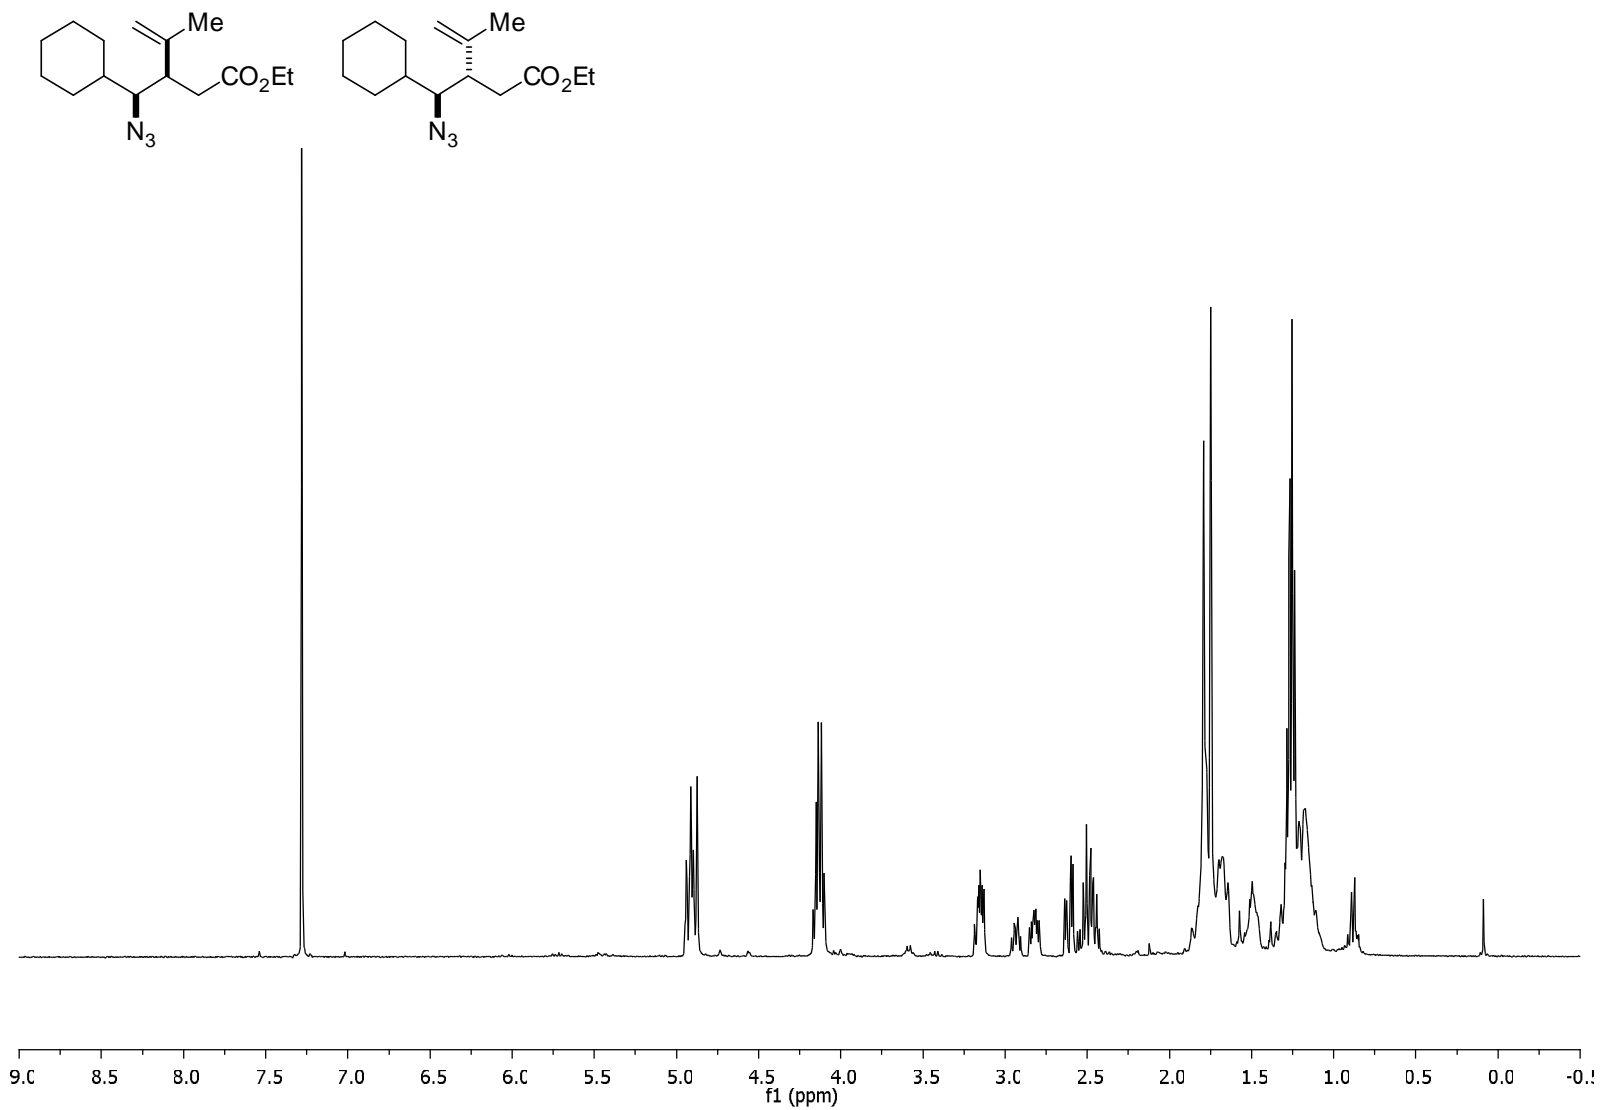

*syn*- and *anti*-9d, 400 MHz, CDCl<sub>3</sub>

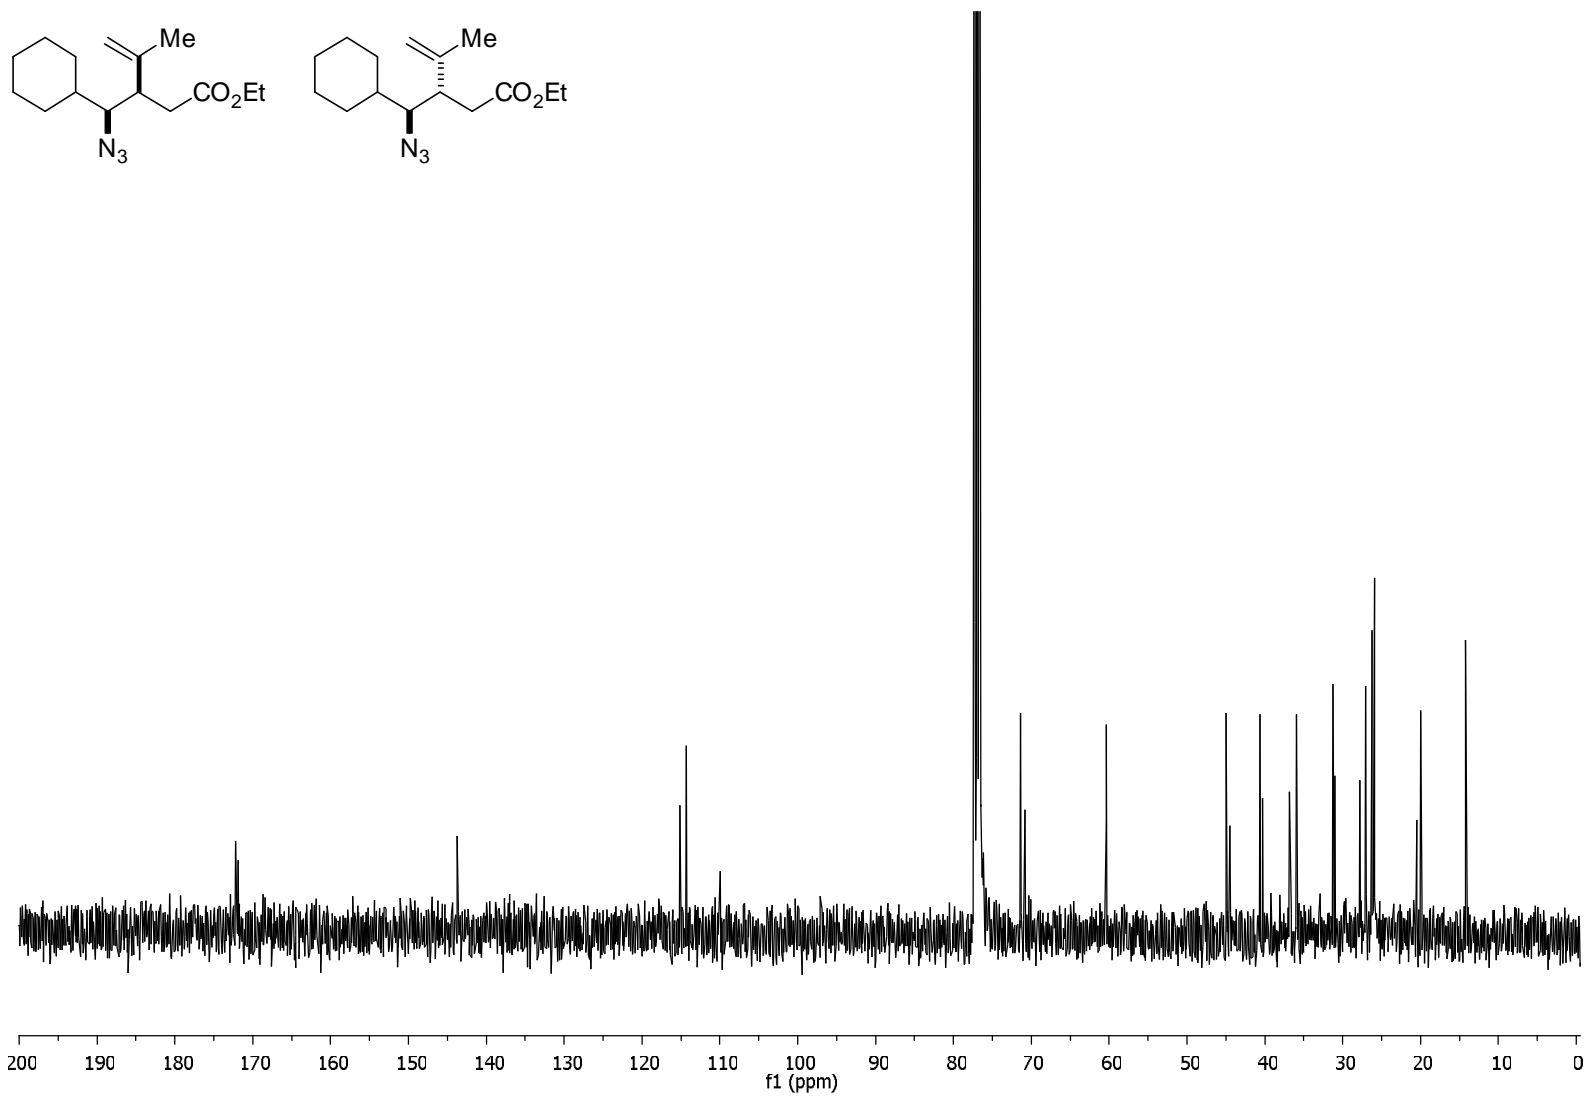

*syn*- and *anti*-9d, 100 MHz, CDCl<sub>3</sub>

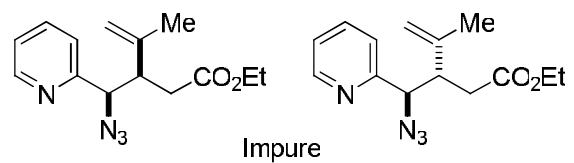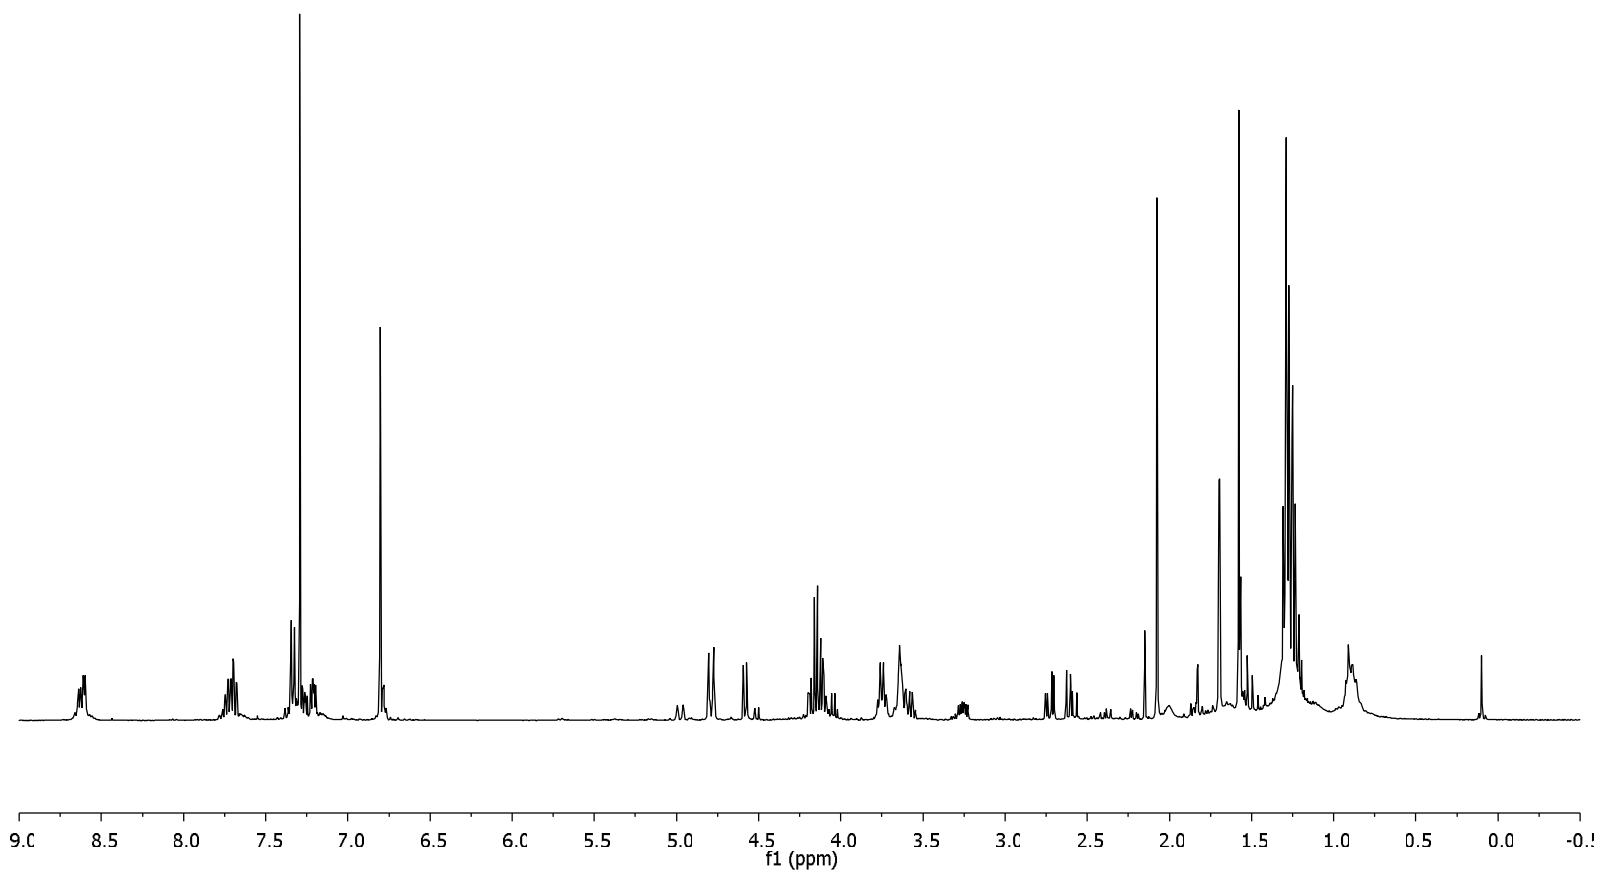

*syn*- and *anti*-9f, 400 MHz, CDCl<sub>3</sub>

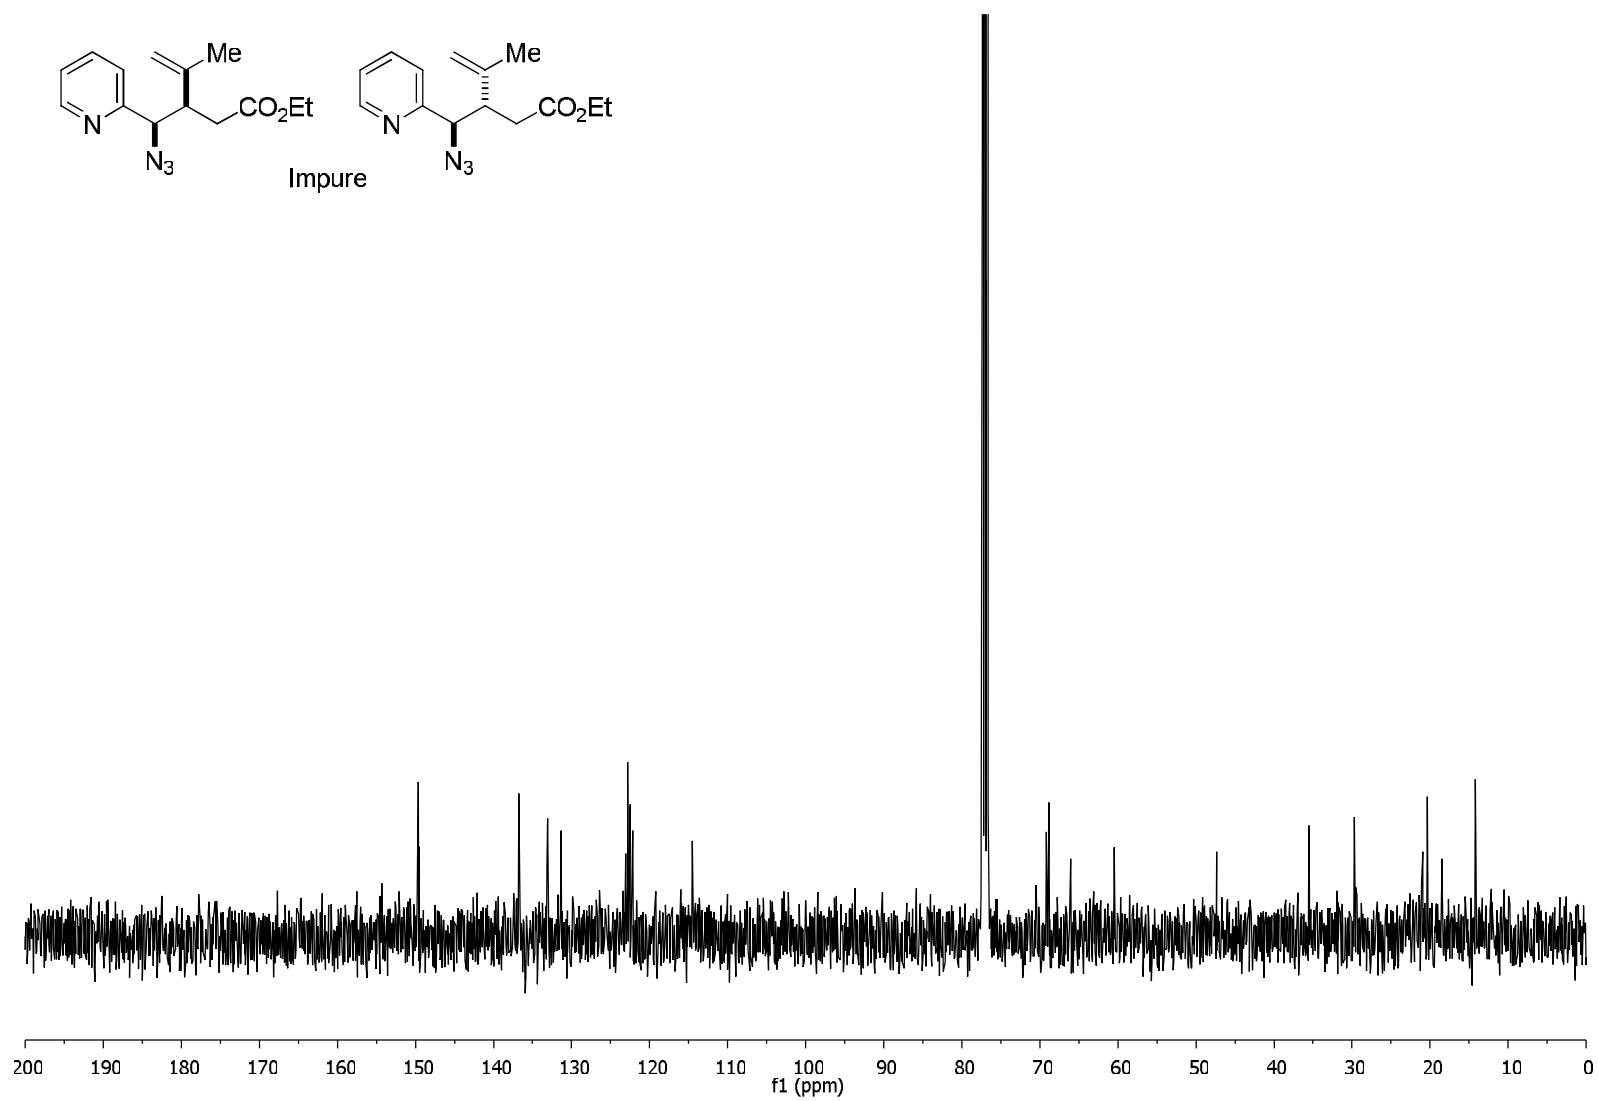

*syn*- and *anti*-**9f**, 100 MHz, CDCl<sub>3</sub>

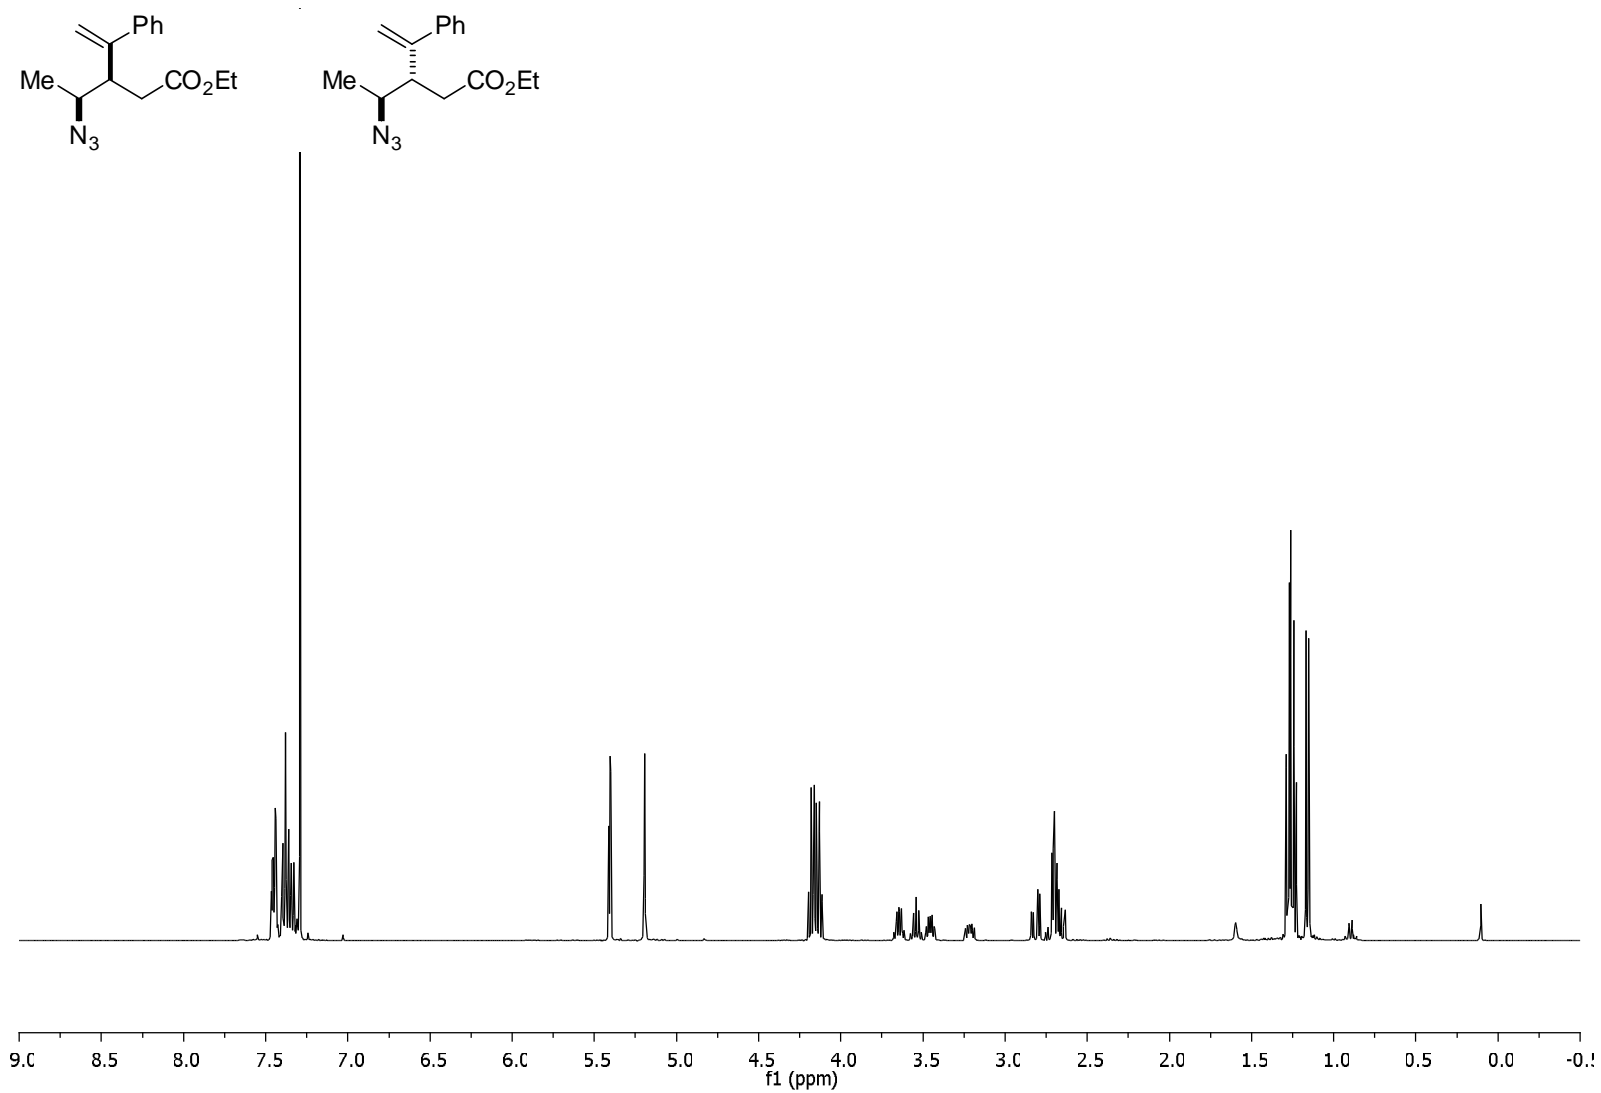

*syn*- and *anti*-9g, 400 MHz, CDCl<sub>3</sub>

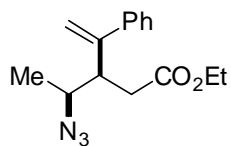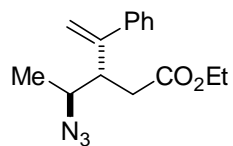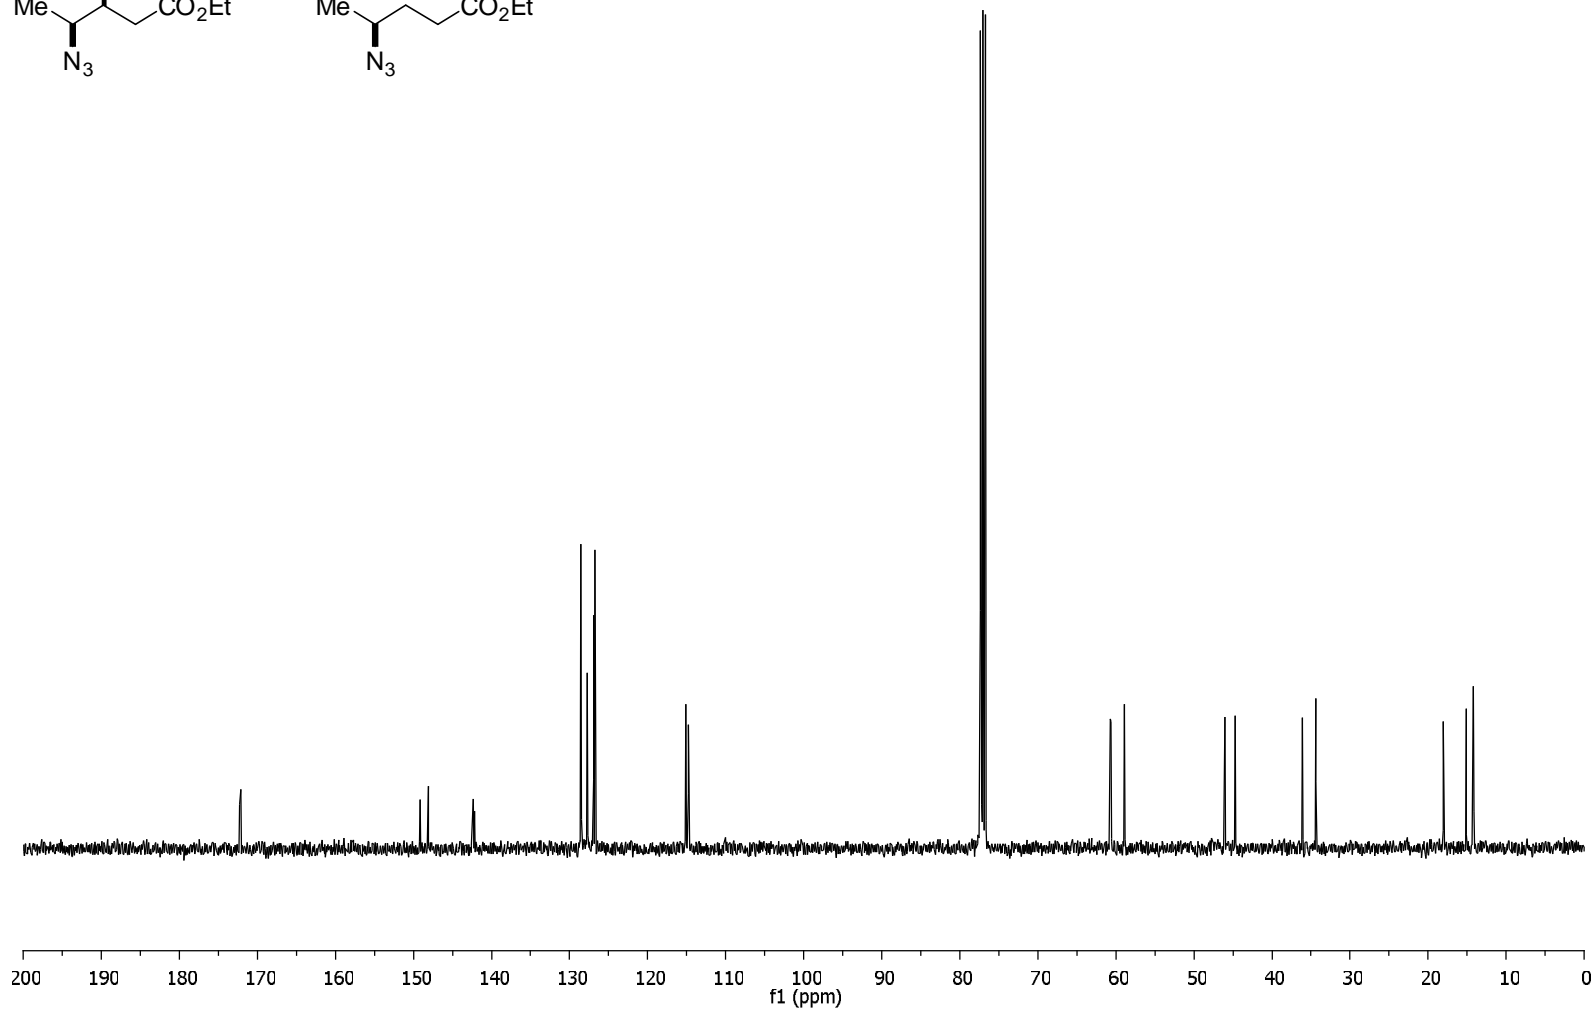

*syn*- and *anti*-**9g**, 100 MHz, CDCl<sub>3</sub>

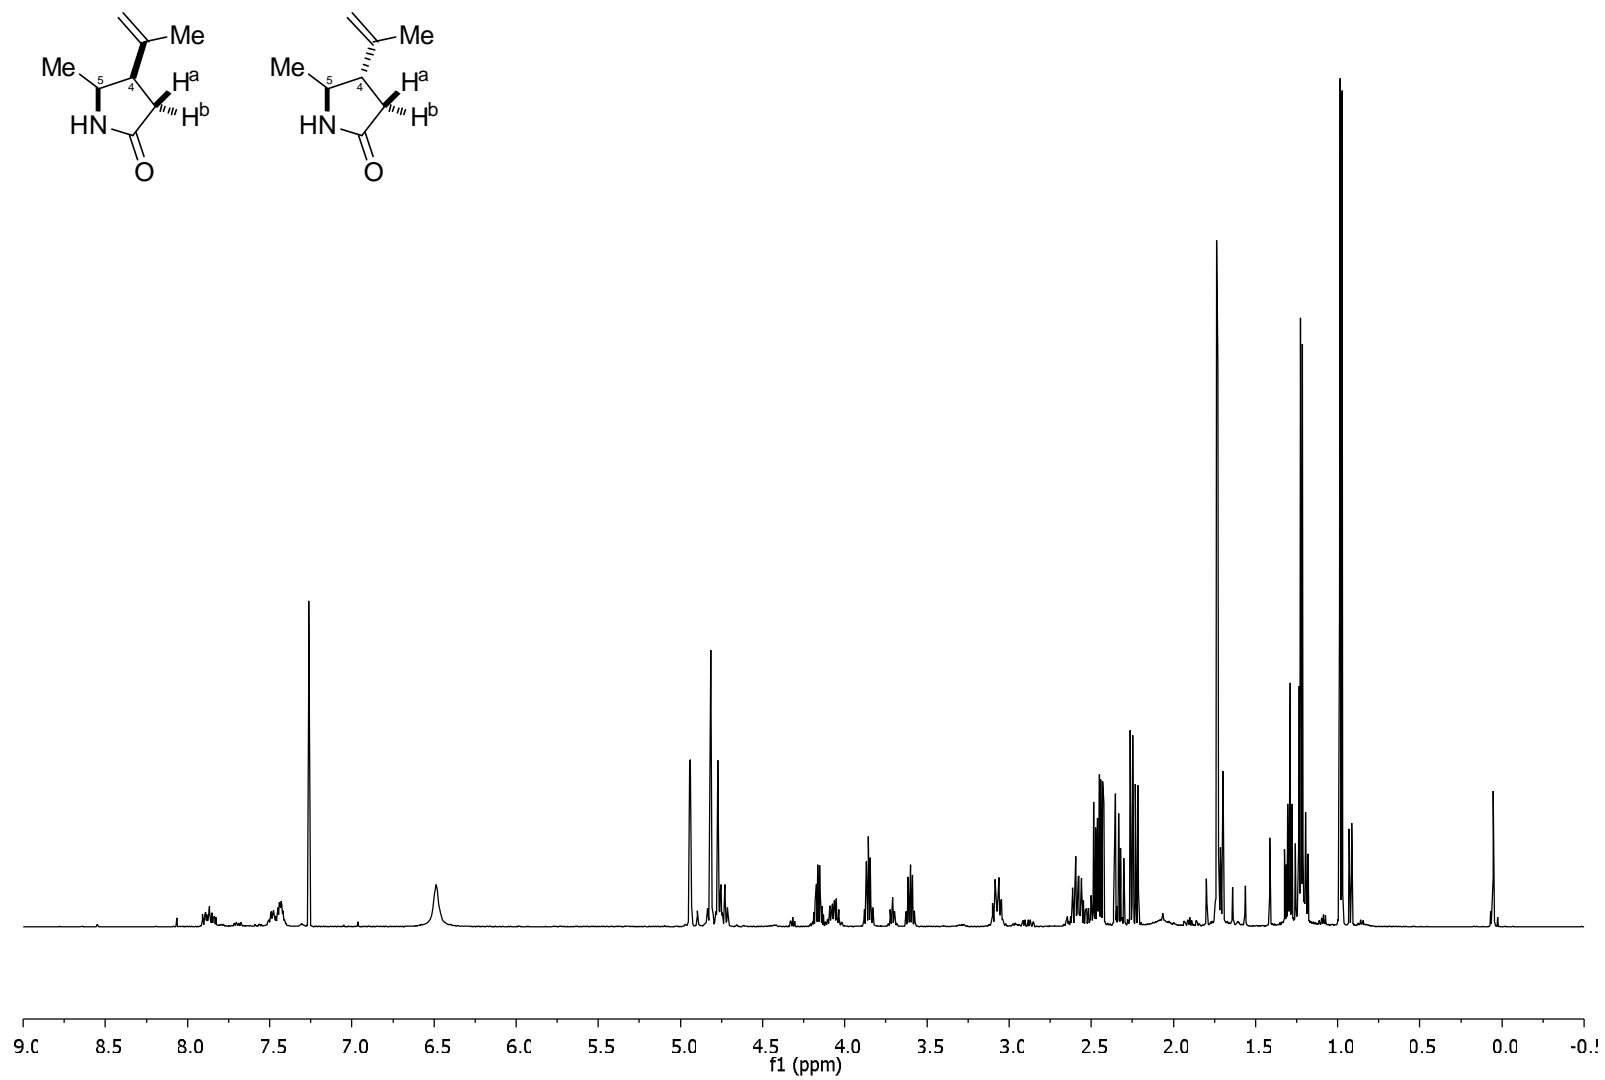

*syn*- and *anti*-10, 500 MHz, CDCl<sub>3</sub>  
Crude mixture from PPh<sub>3</sub> reaction

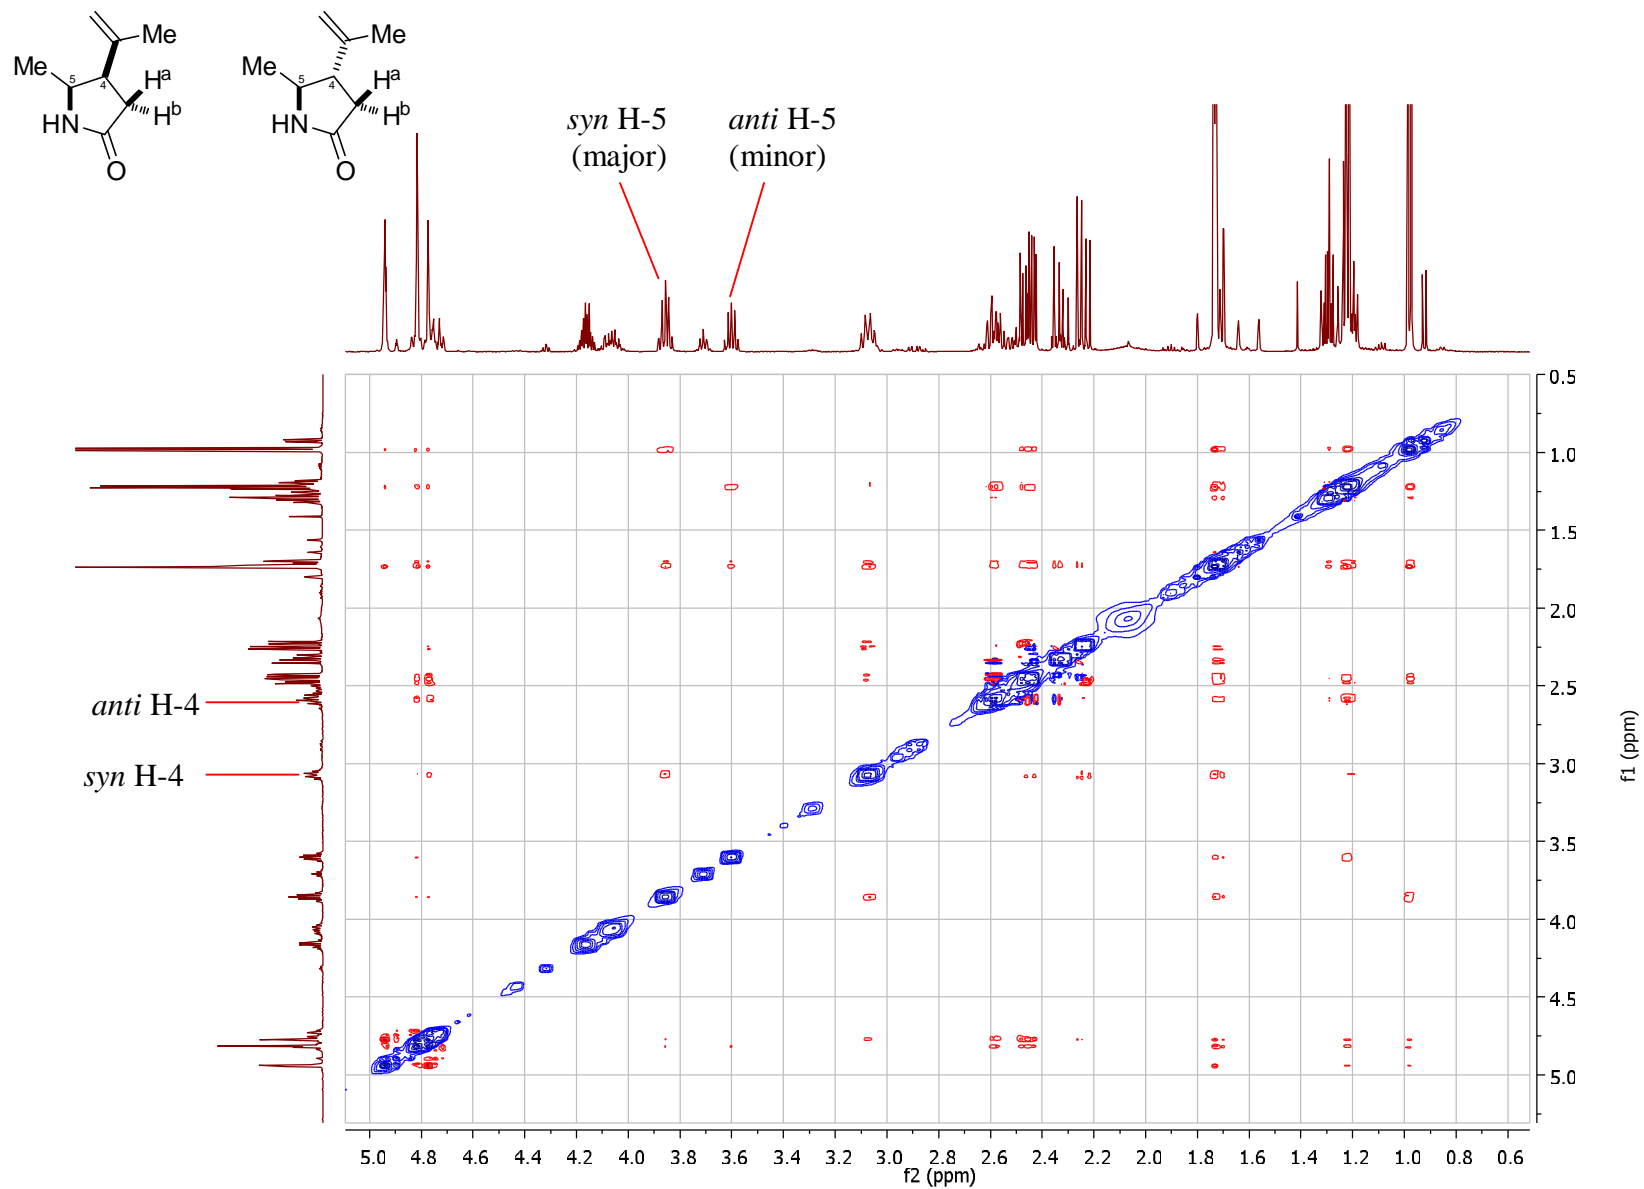

*syn*- and *anti*-10, 500 MHz, CDCl<sub>3</sub> NOESY-NMR  
Crude mixture from PPh<sub>3</sub> reaction



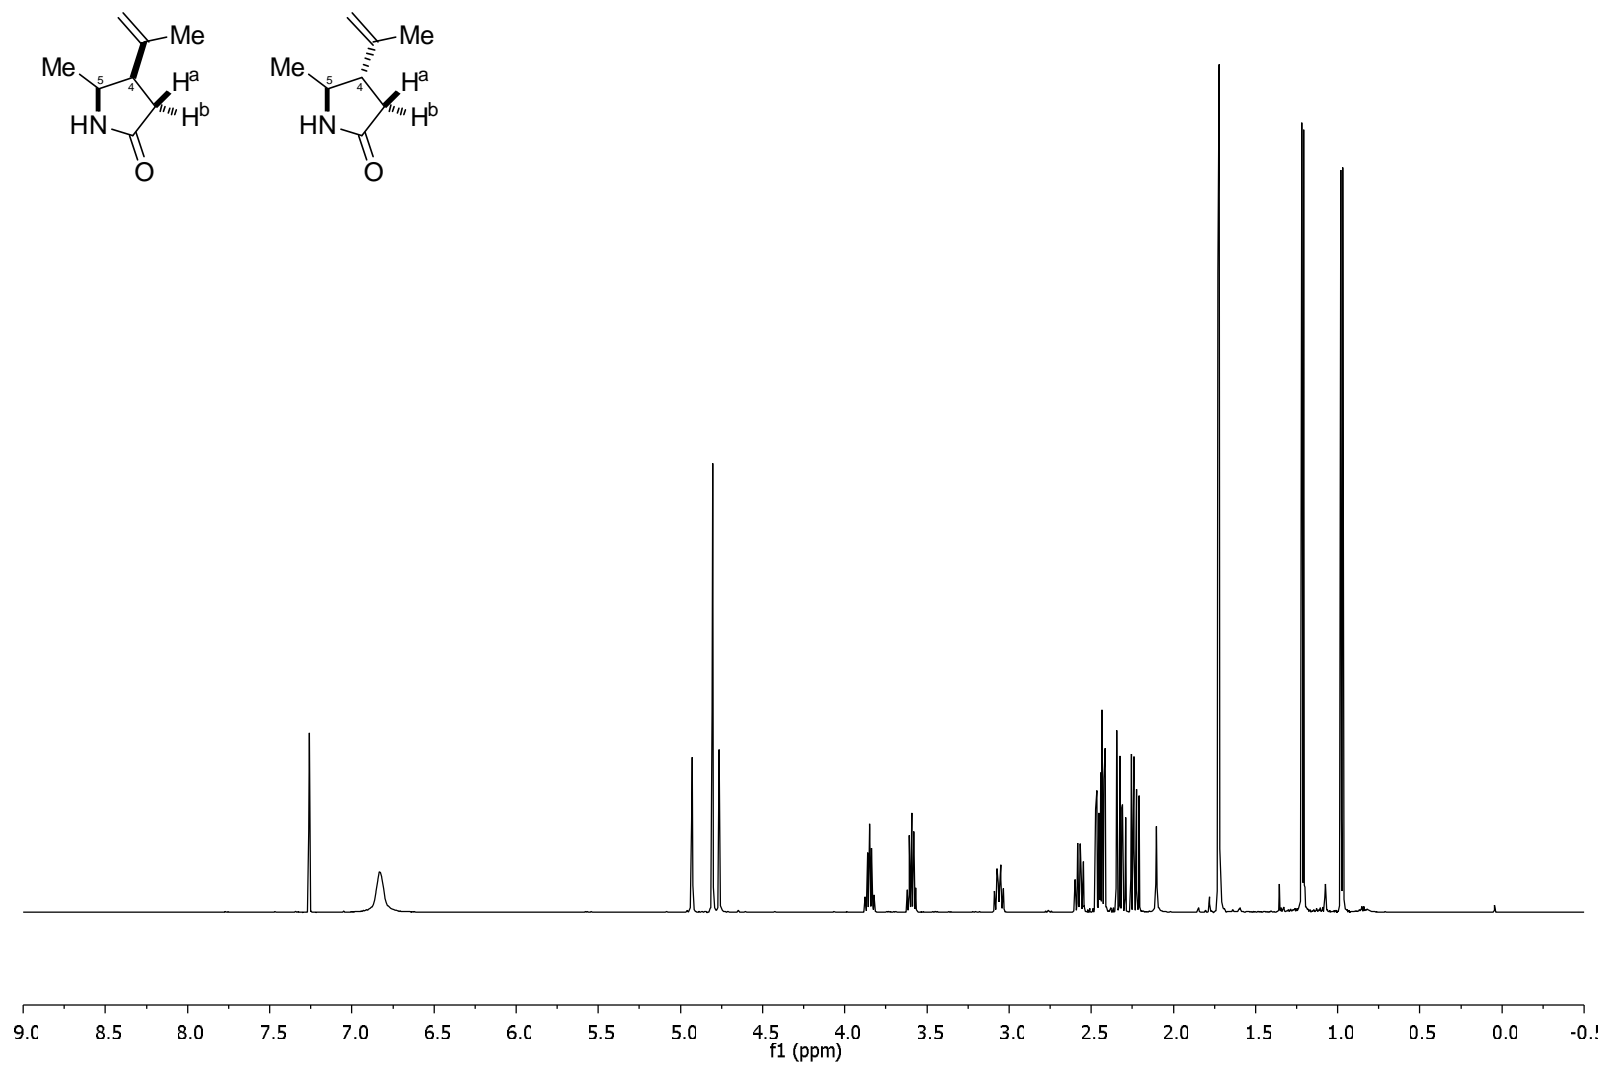

*syn*- and *anti*-10, 500 MHz, CDCl<sub>3</sub>  
Purified epimerised mixture from PMe<sub>3</sub> reaction

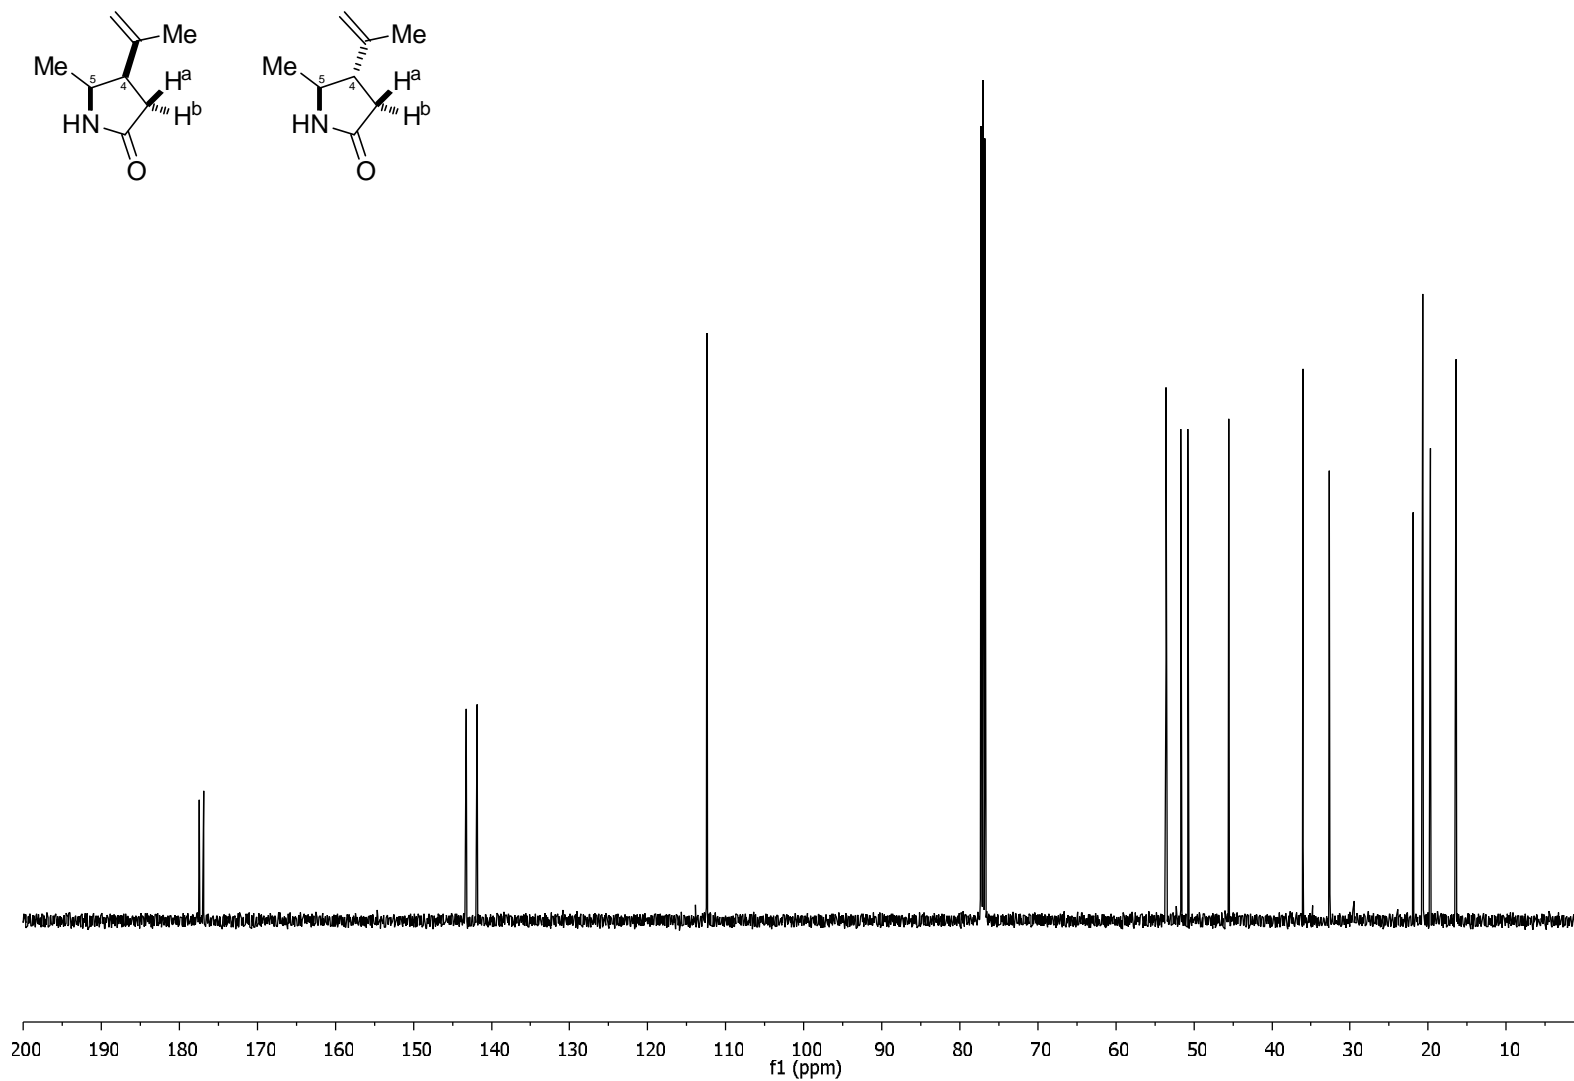

*syn*- and *anti*-10, 126 MHz, CDCl<sub>3</sub>  
Purified epimerised mixture from PMe<sub>3</sub> reaction

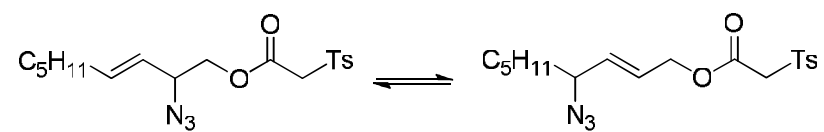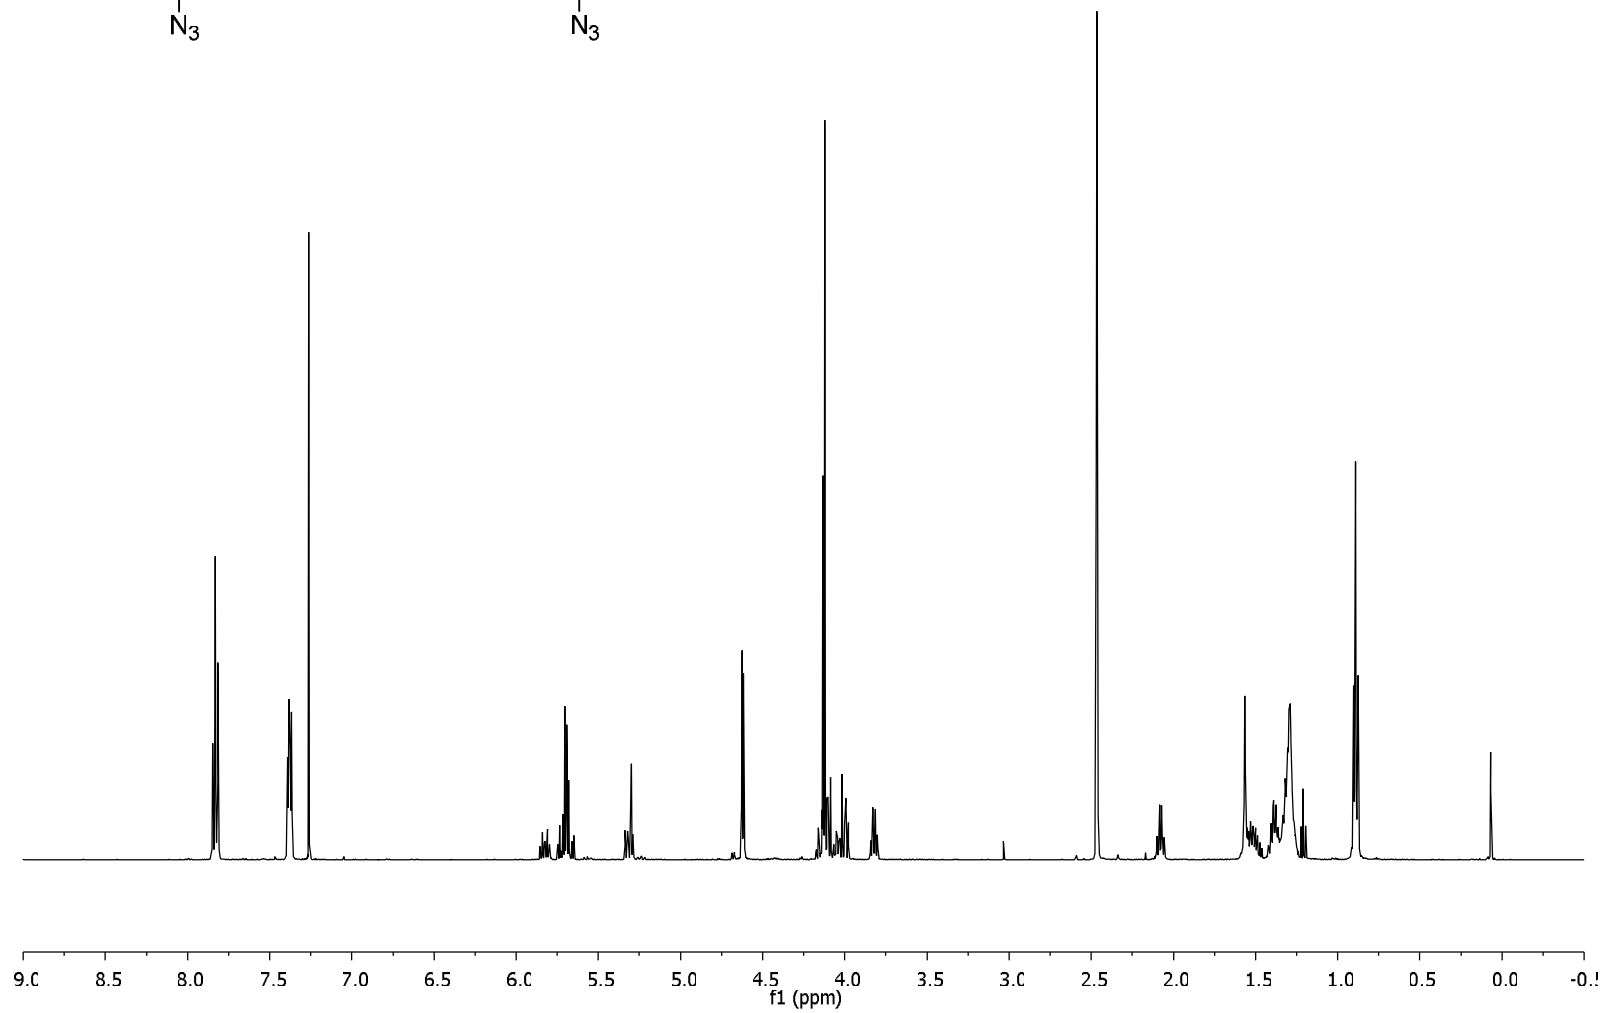

**12a** and **13a**, 400 MHz, CDCl<sub>3</sub>

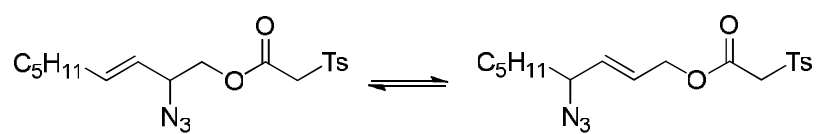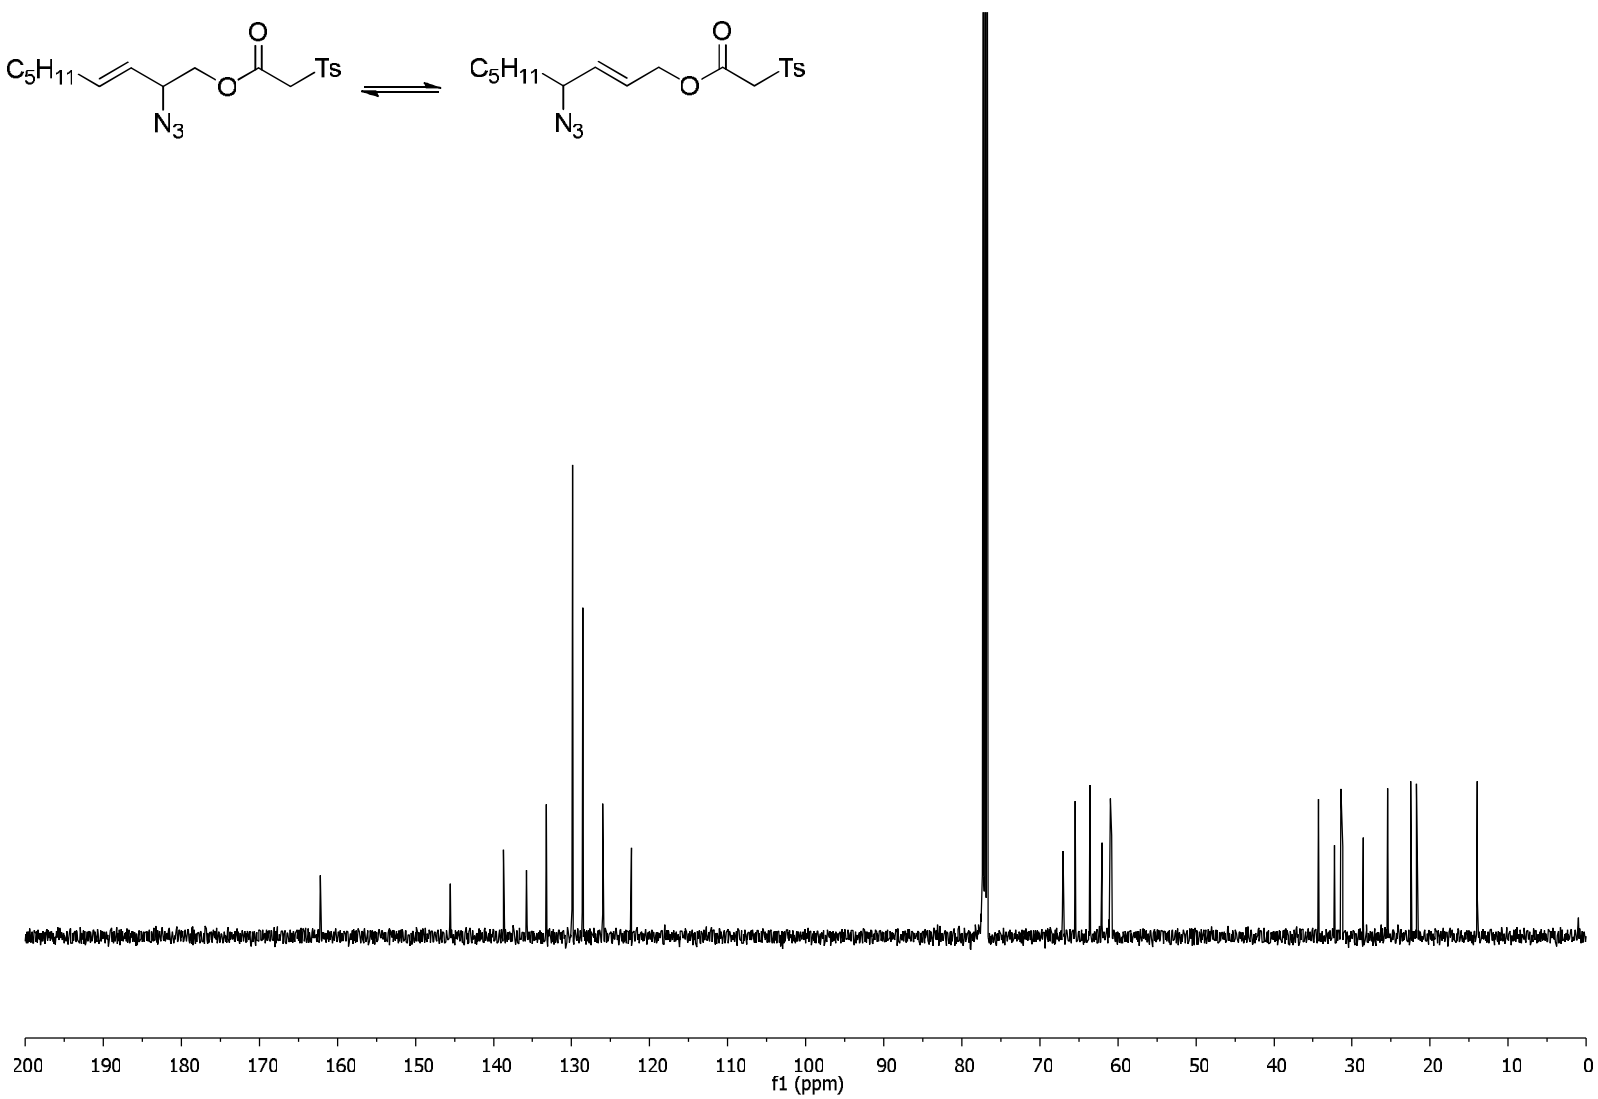

**12a and 13a**, 100 MHz, CDCl<sub>3</sub>

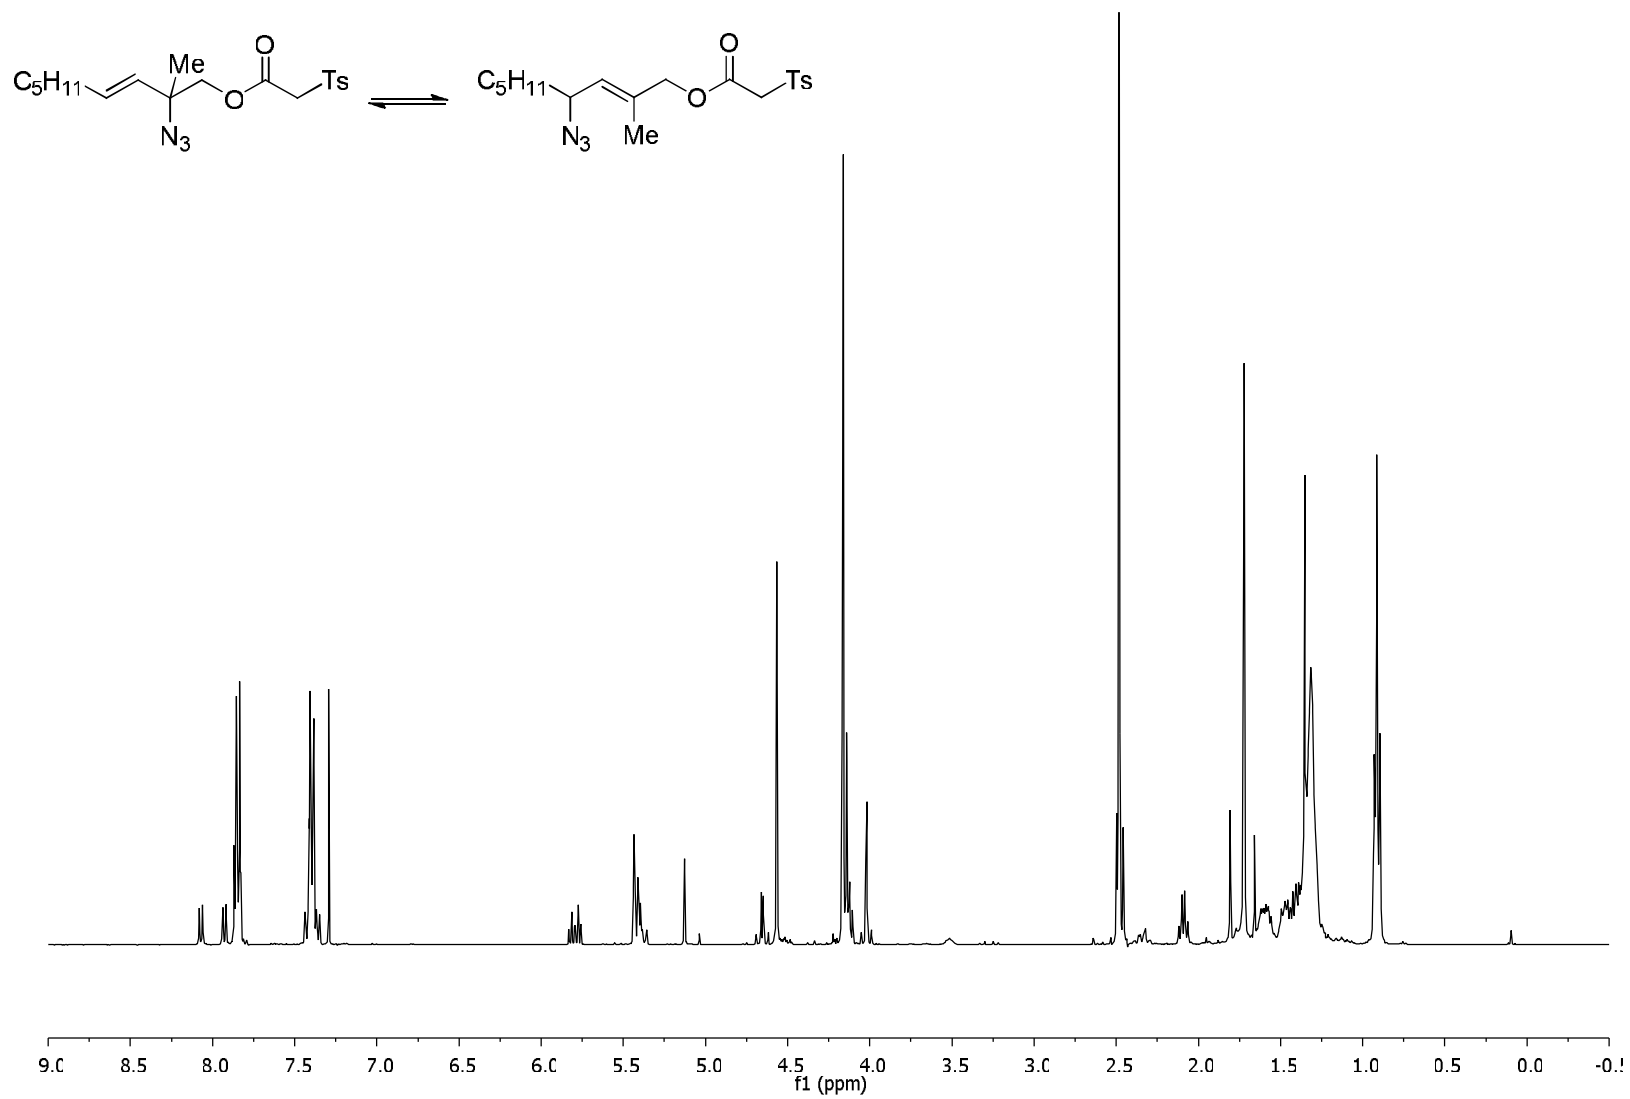

**12b** and **13b**, 400 MHz, CDCl<sub>3</sub>

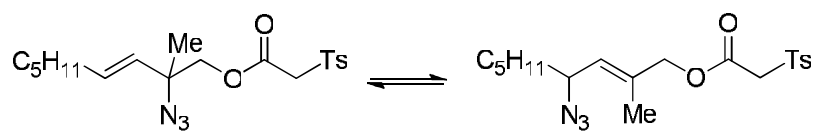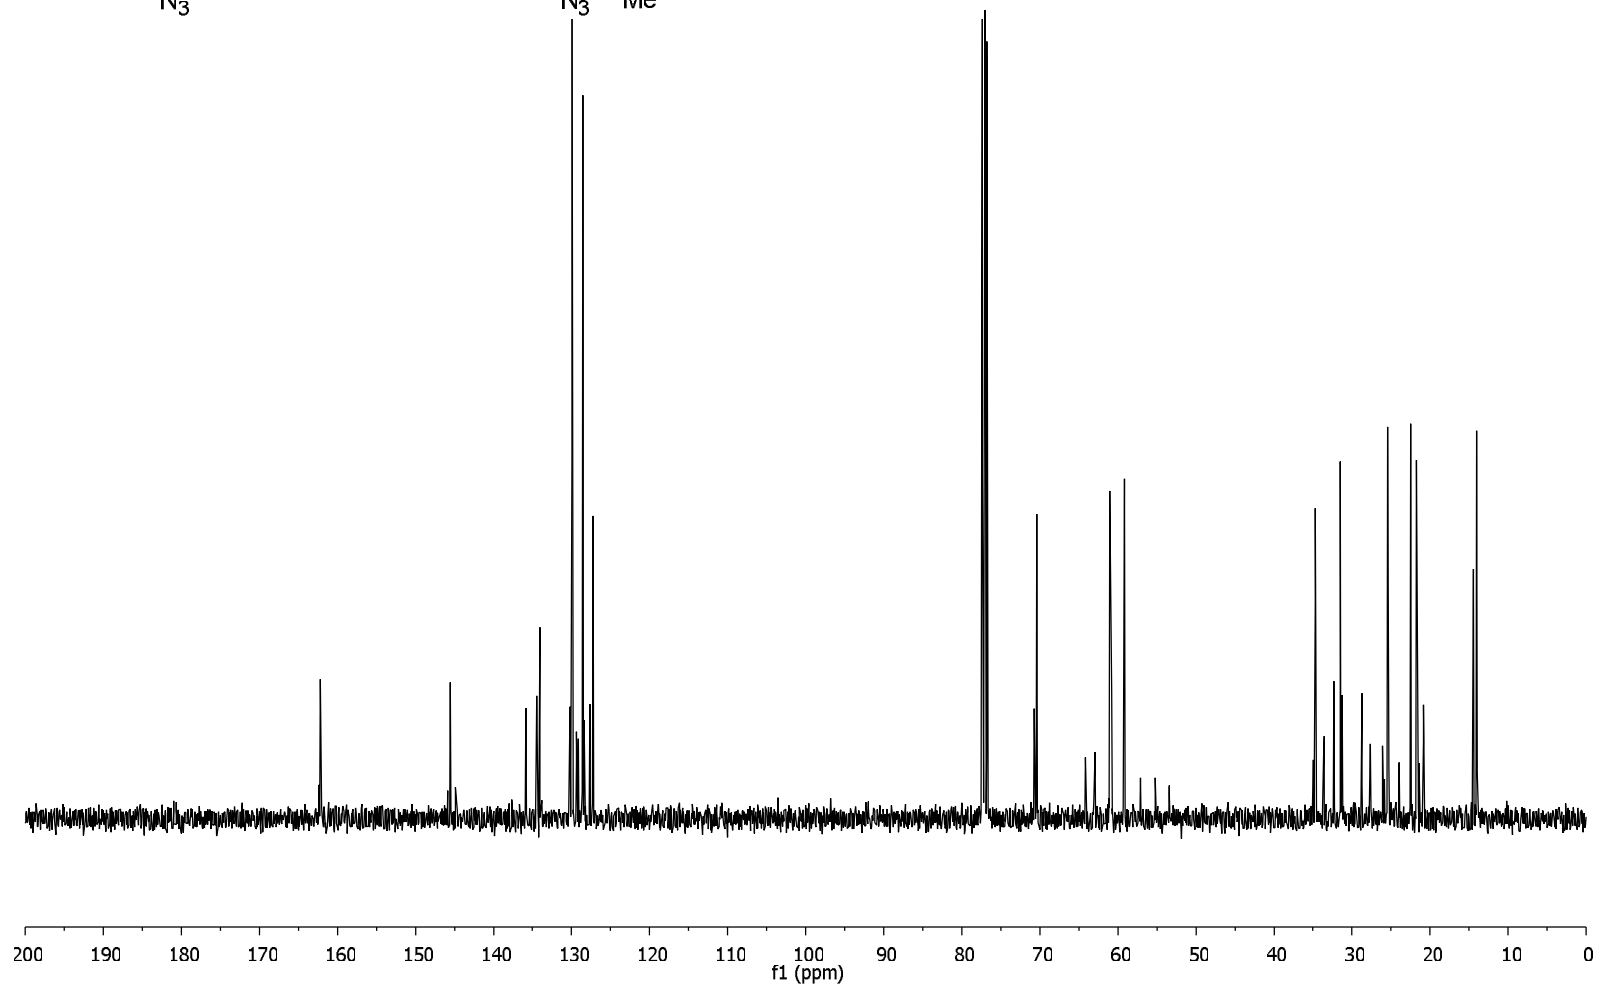

**12b** and **13b**, 100 MHz, CDCl<sub>3</sub>

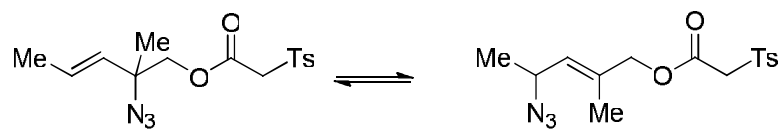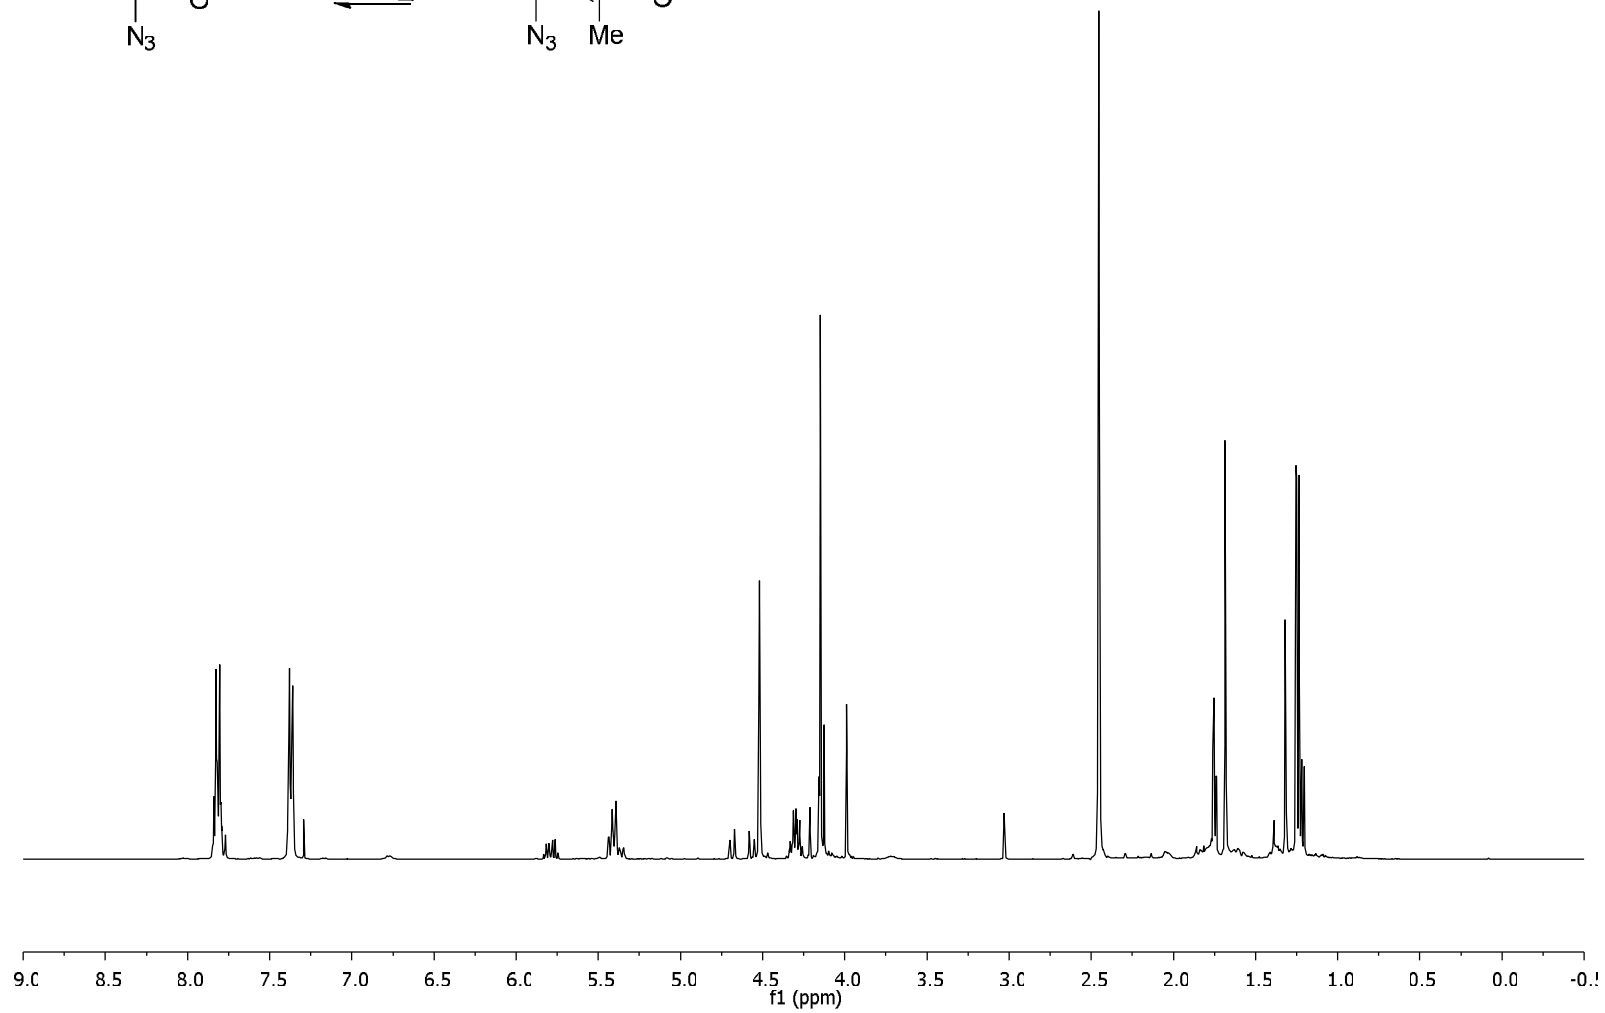

**12c** and **13c**, 400 MHz, CDCl<sub>3</sub>

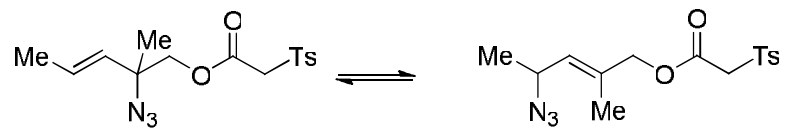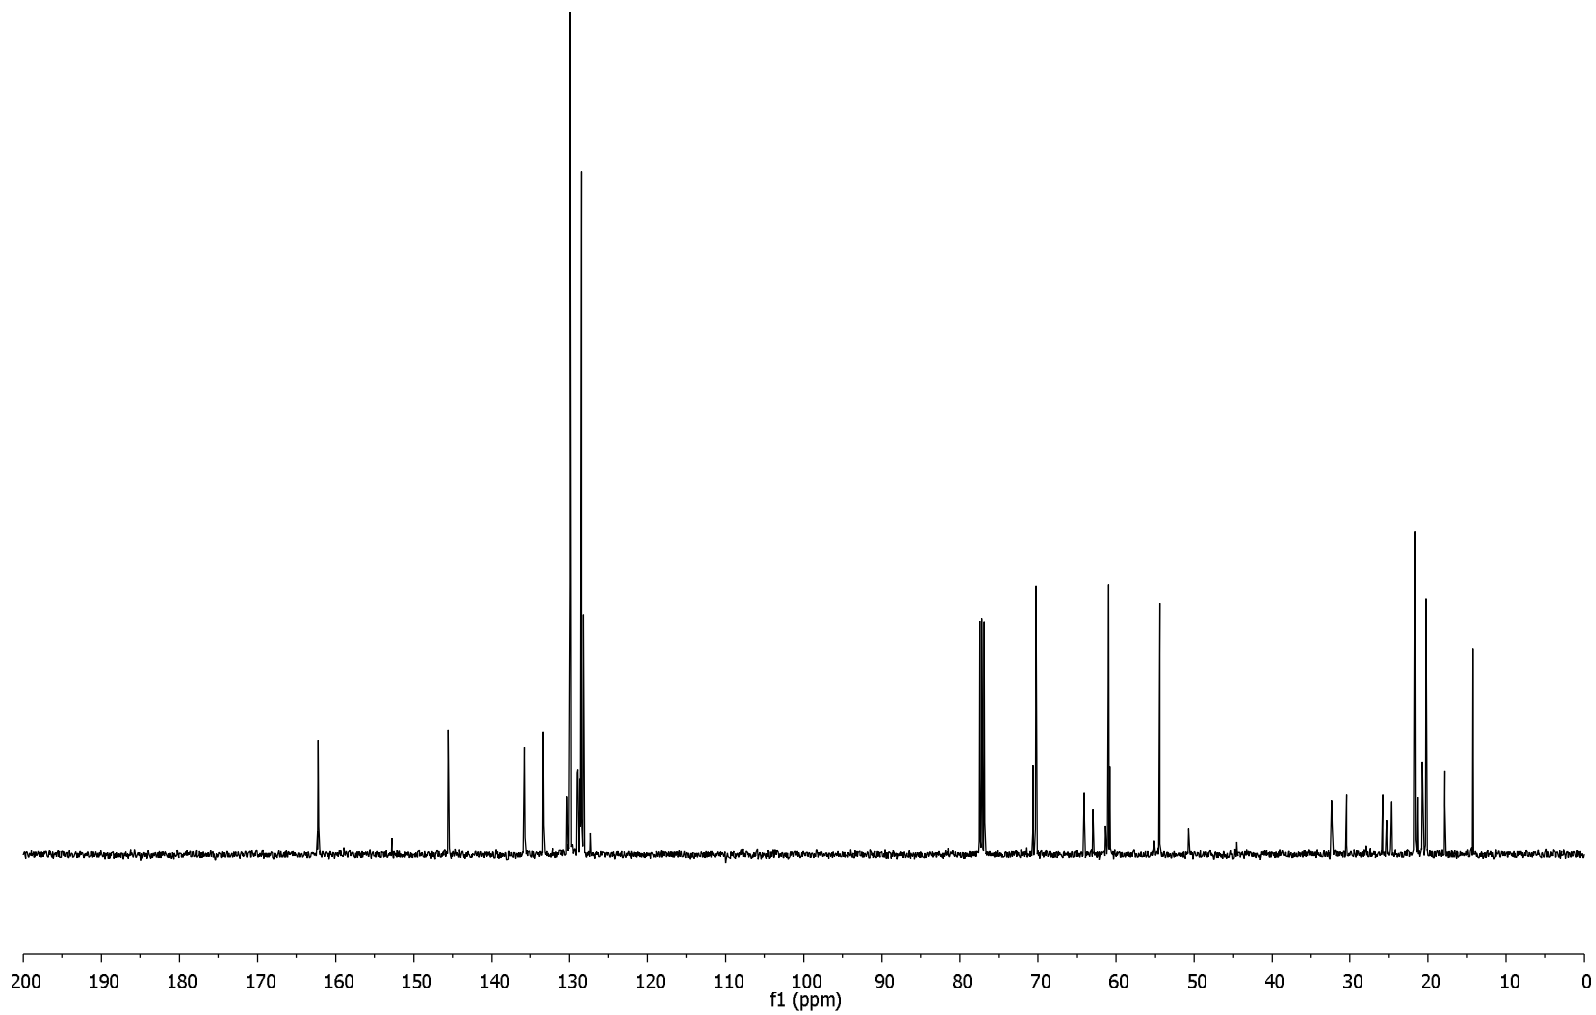

**12c** and **13c**, 100 MHz, CDCl<sub>3</sub>



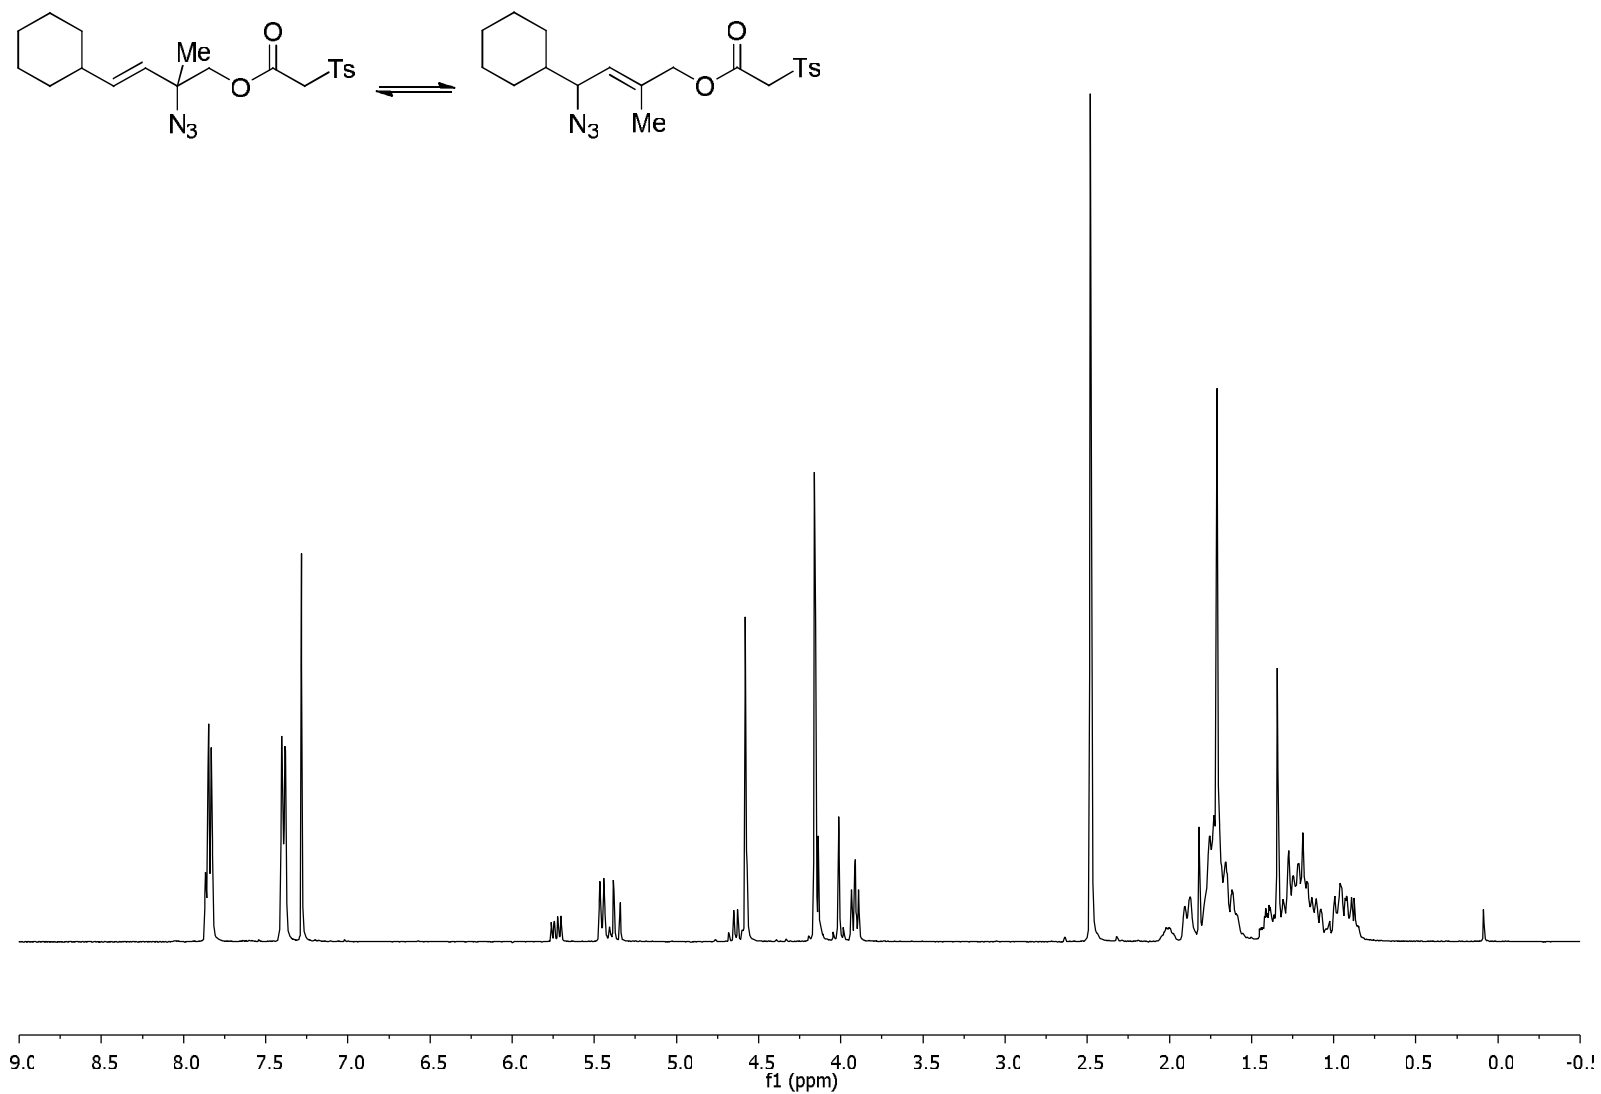

**12d** and **13d**, 400 MHz, CDCl<sub>3</sub>

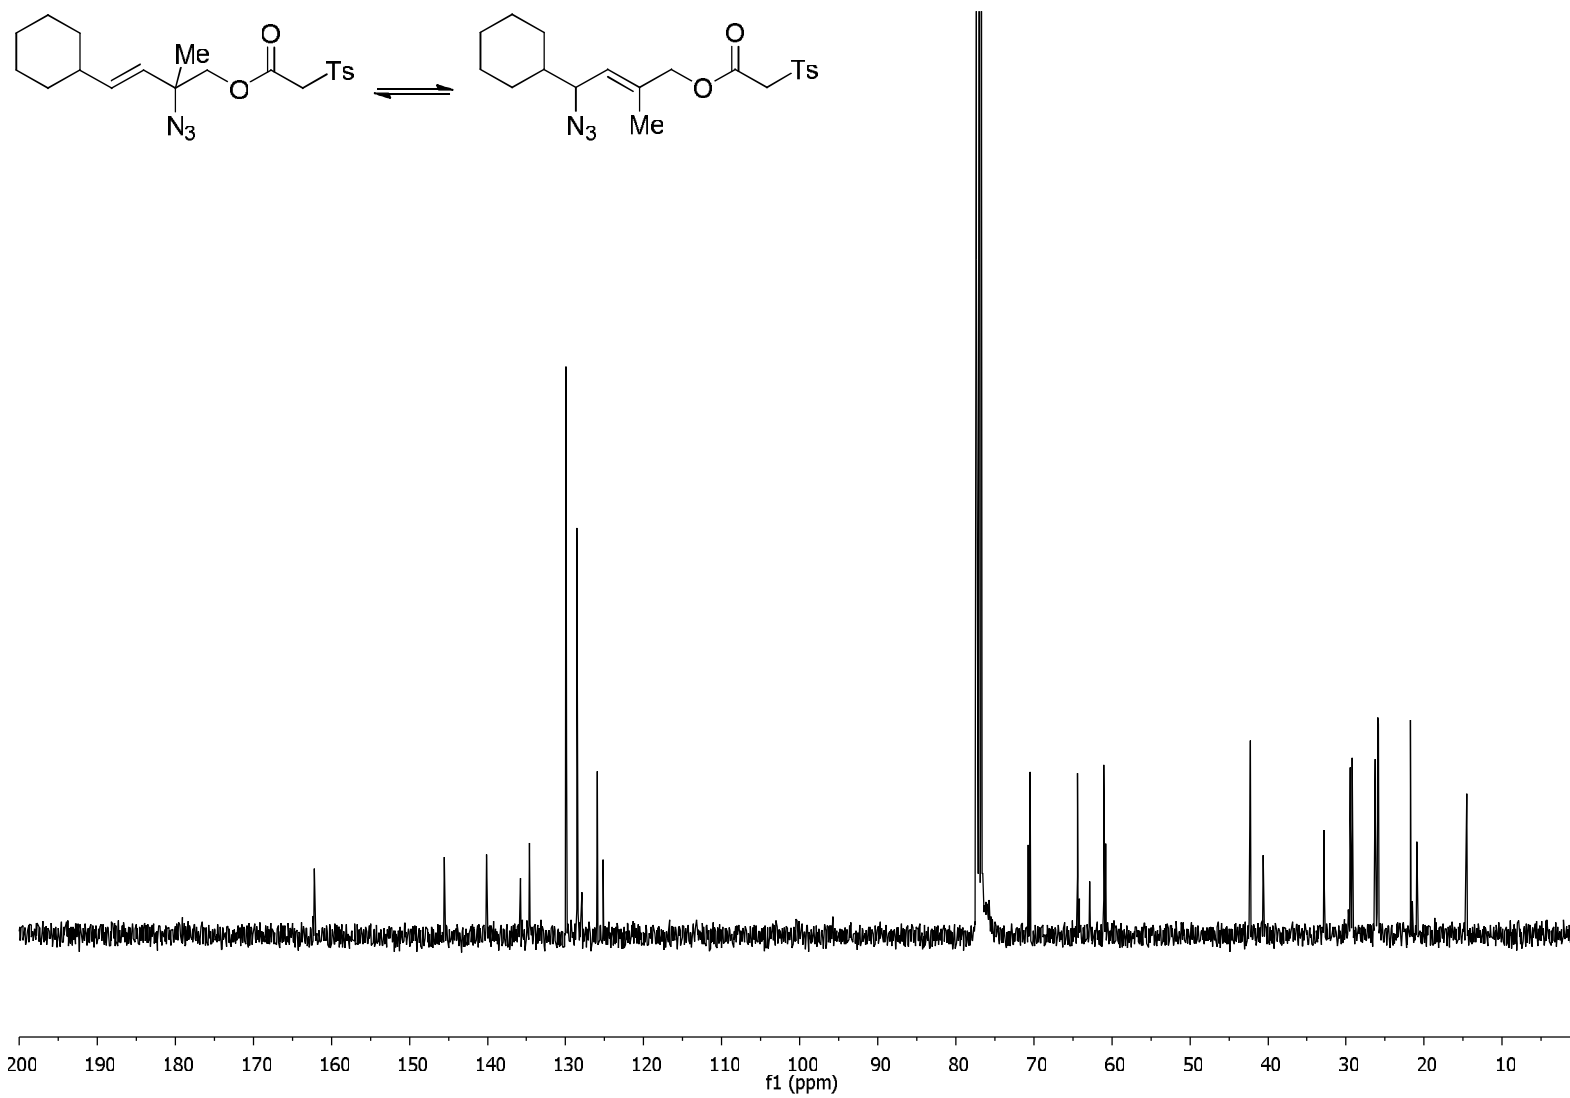

12d and 13d, 100 MHz, CDCl<sub>3</sub>

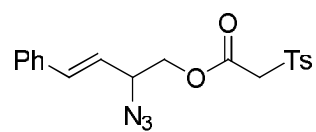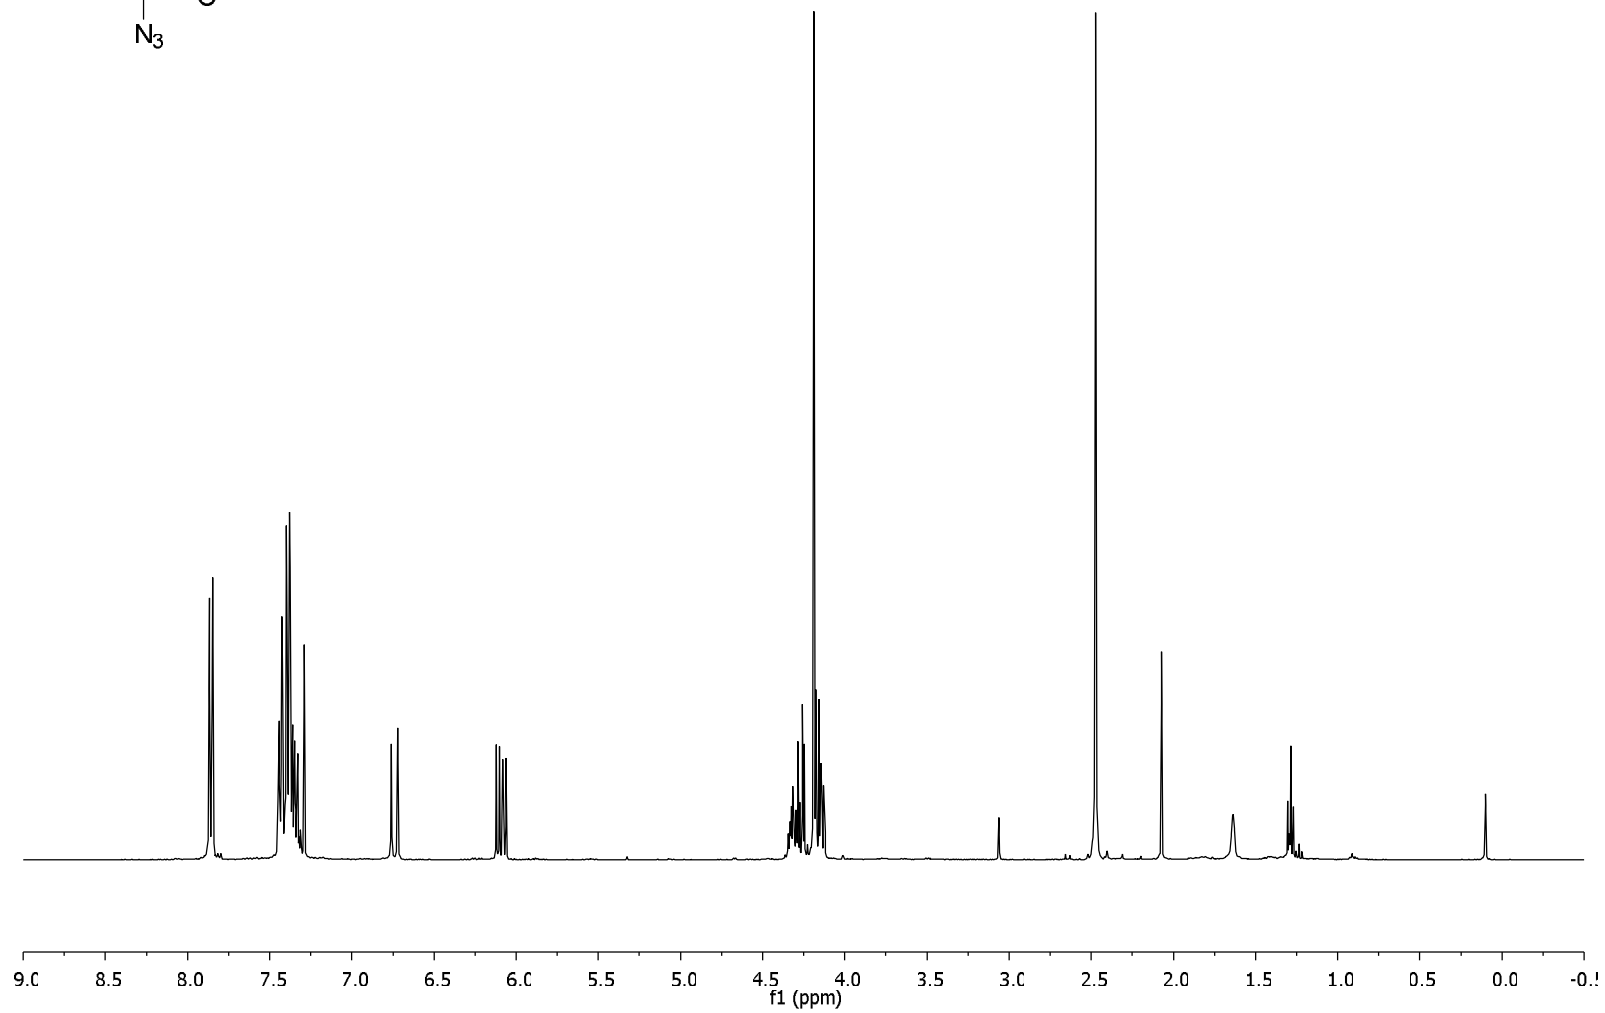

**12e**, 400 MHz, CDCl<sub>3</sub>

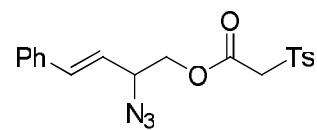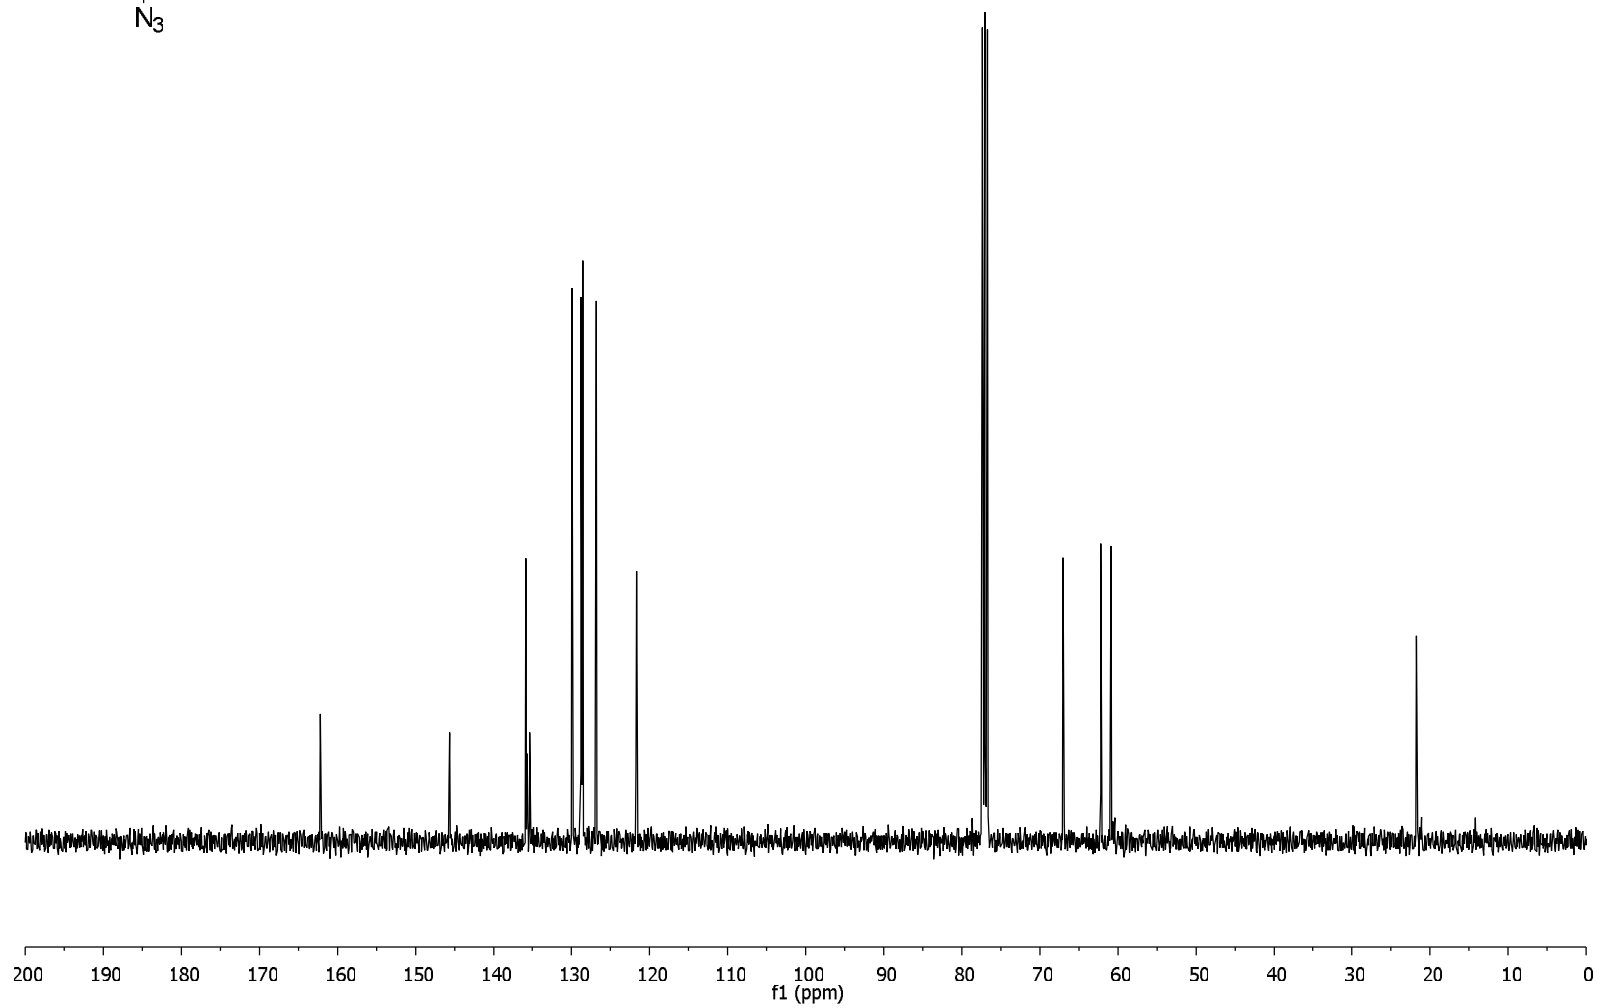

**12e**, 100 MHz, CDCl<sub>3</sub>

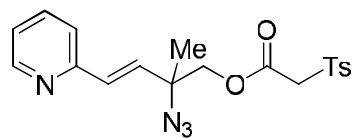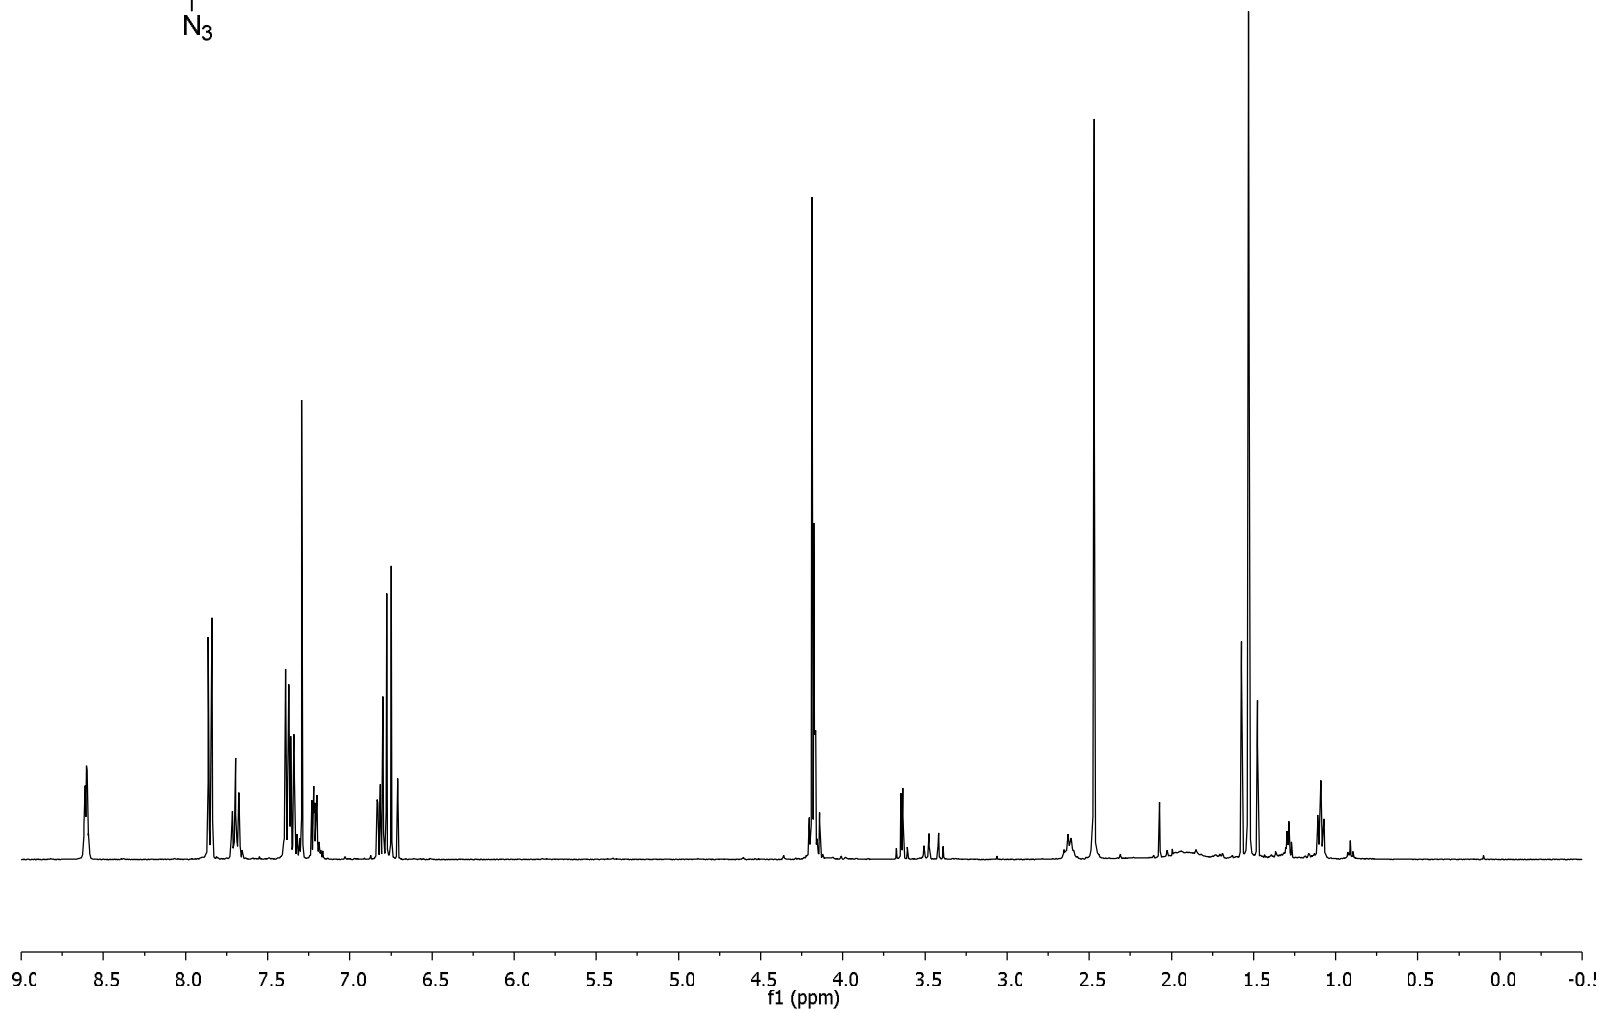

**12f**, 400 MHz, CDCl<sub>3</sub>

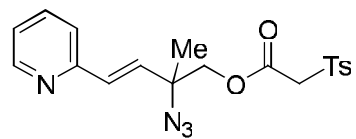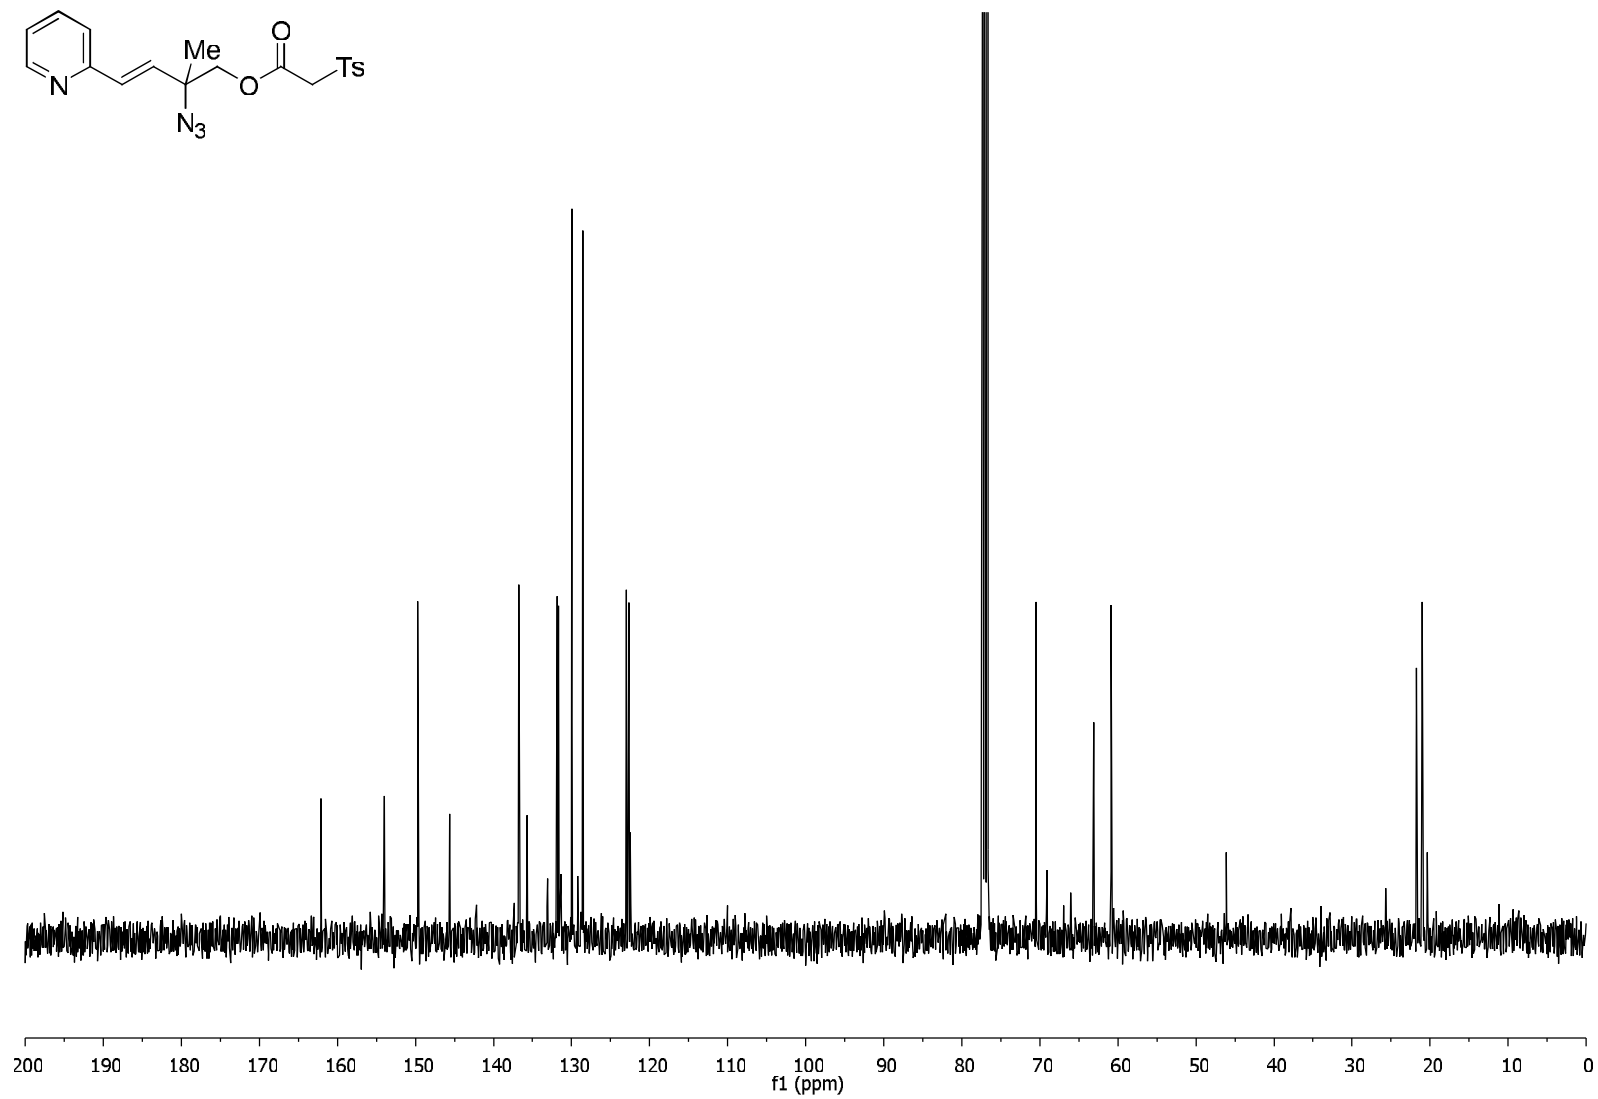

**12f**, 100 MHz, CDCl<sub>3</sub>

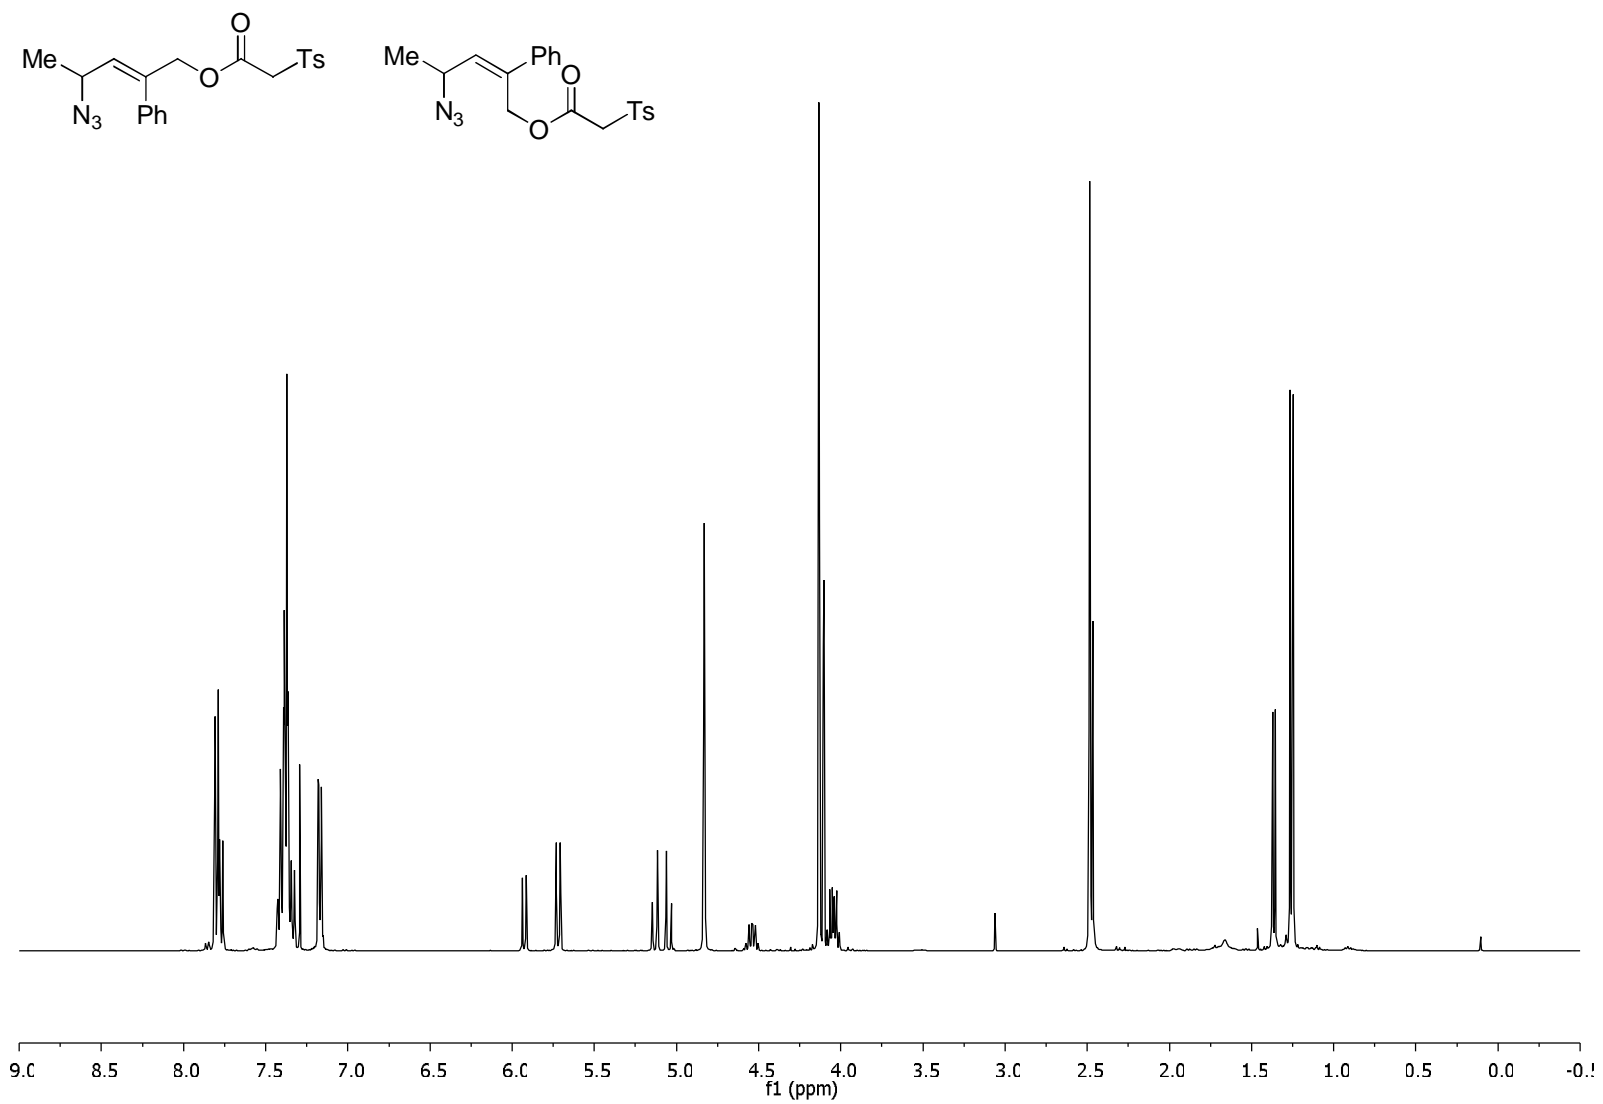

*E*13g and *Z*-13g, 400 MHz, CDCl<sub>3</sub>

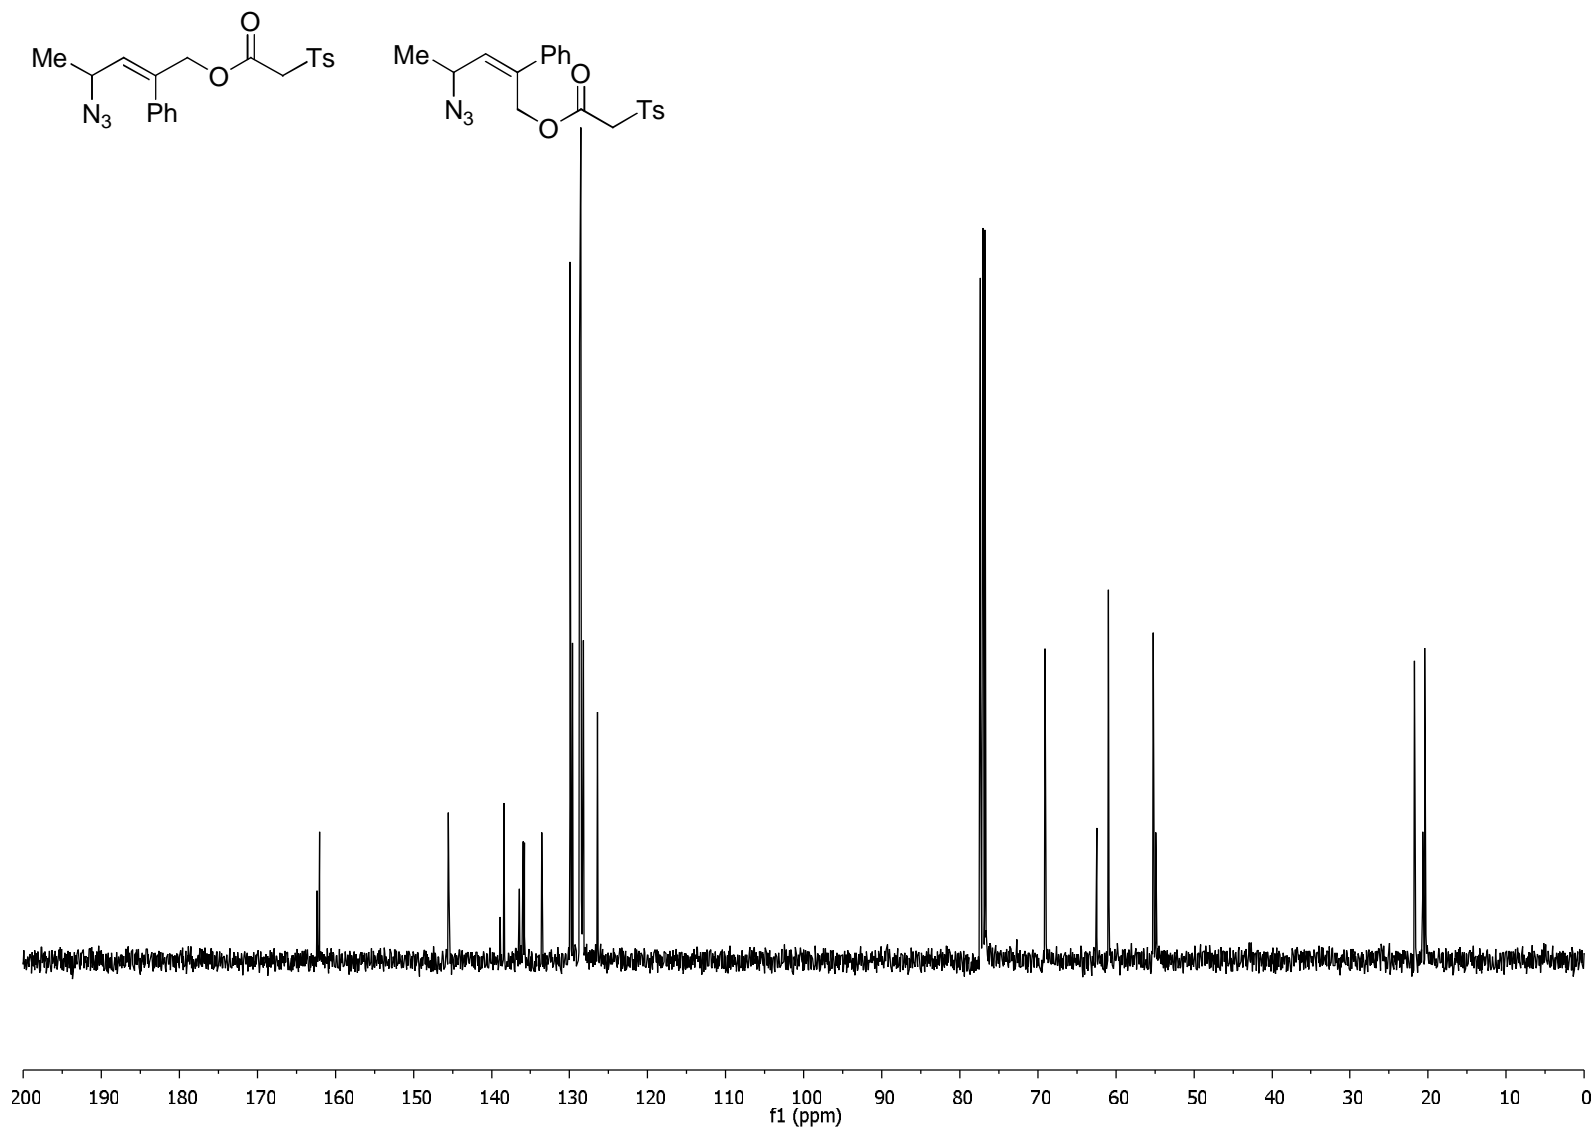

*E13g* and *Z-13g*, 100 MHz, CDCl<sub>3</sub>



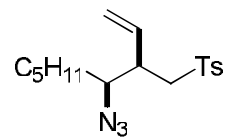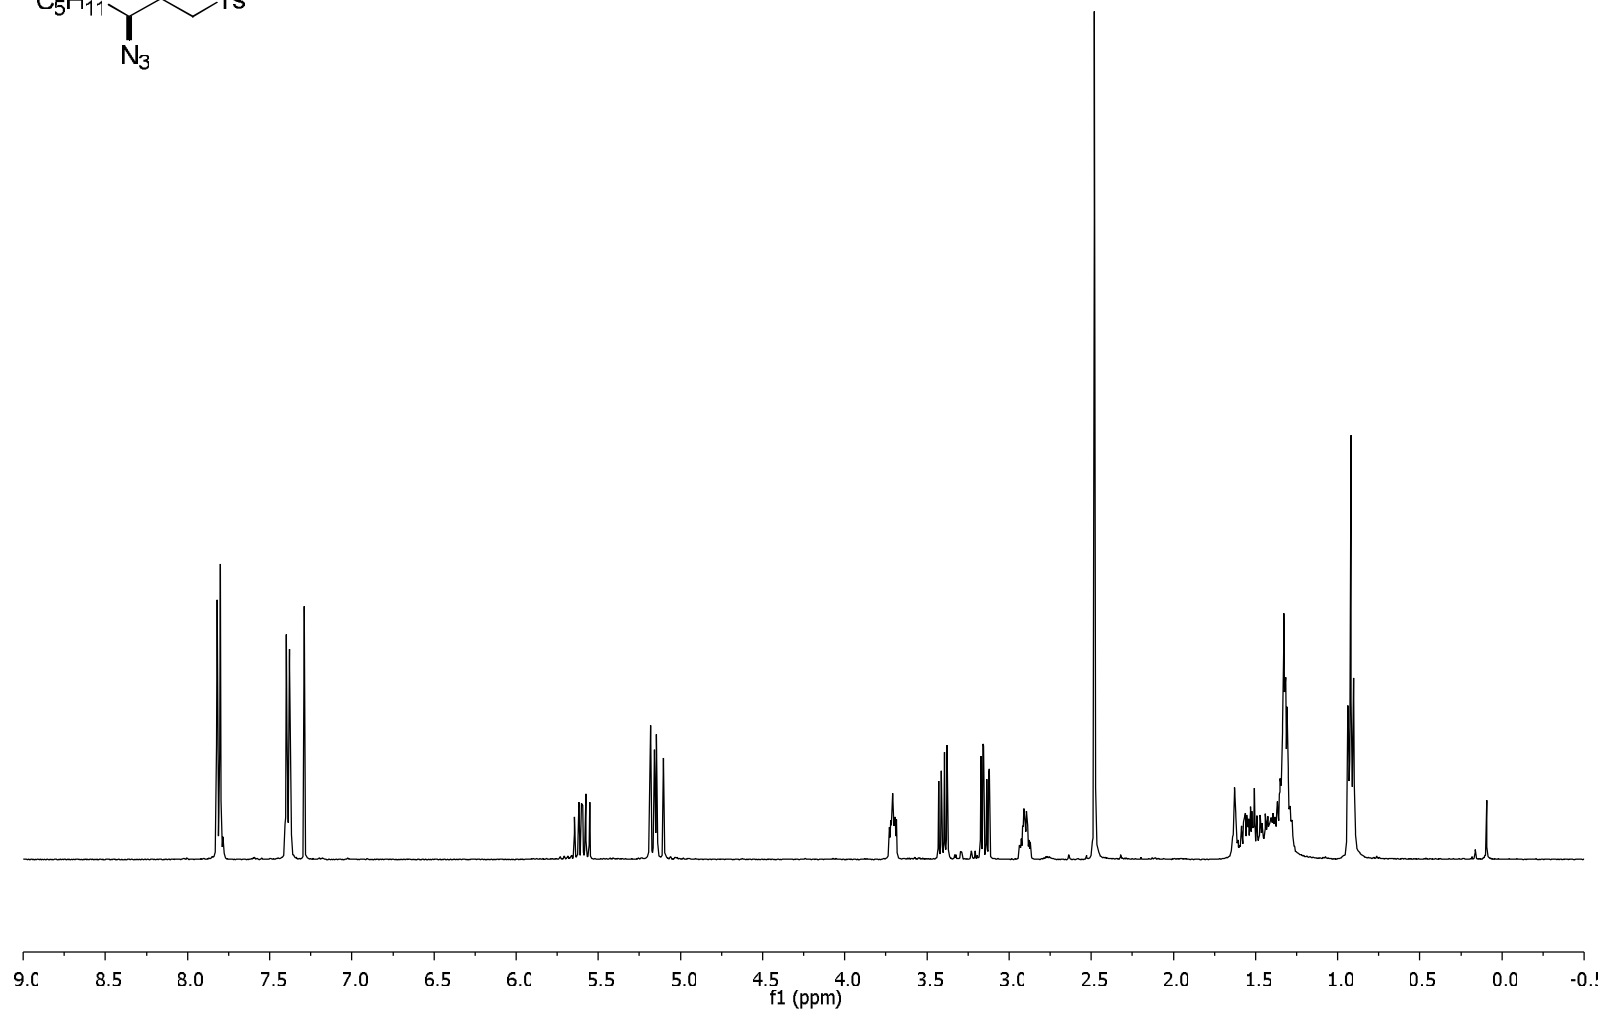

*syn-15a*, 400 MHz, CDCl<sub>3</sub>

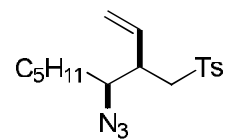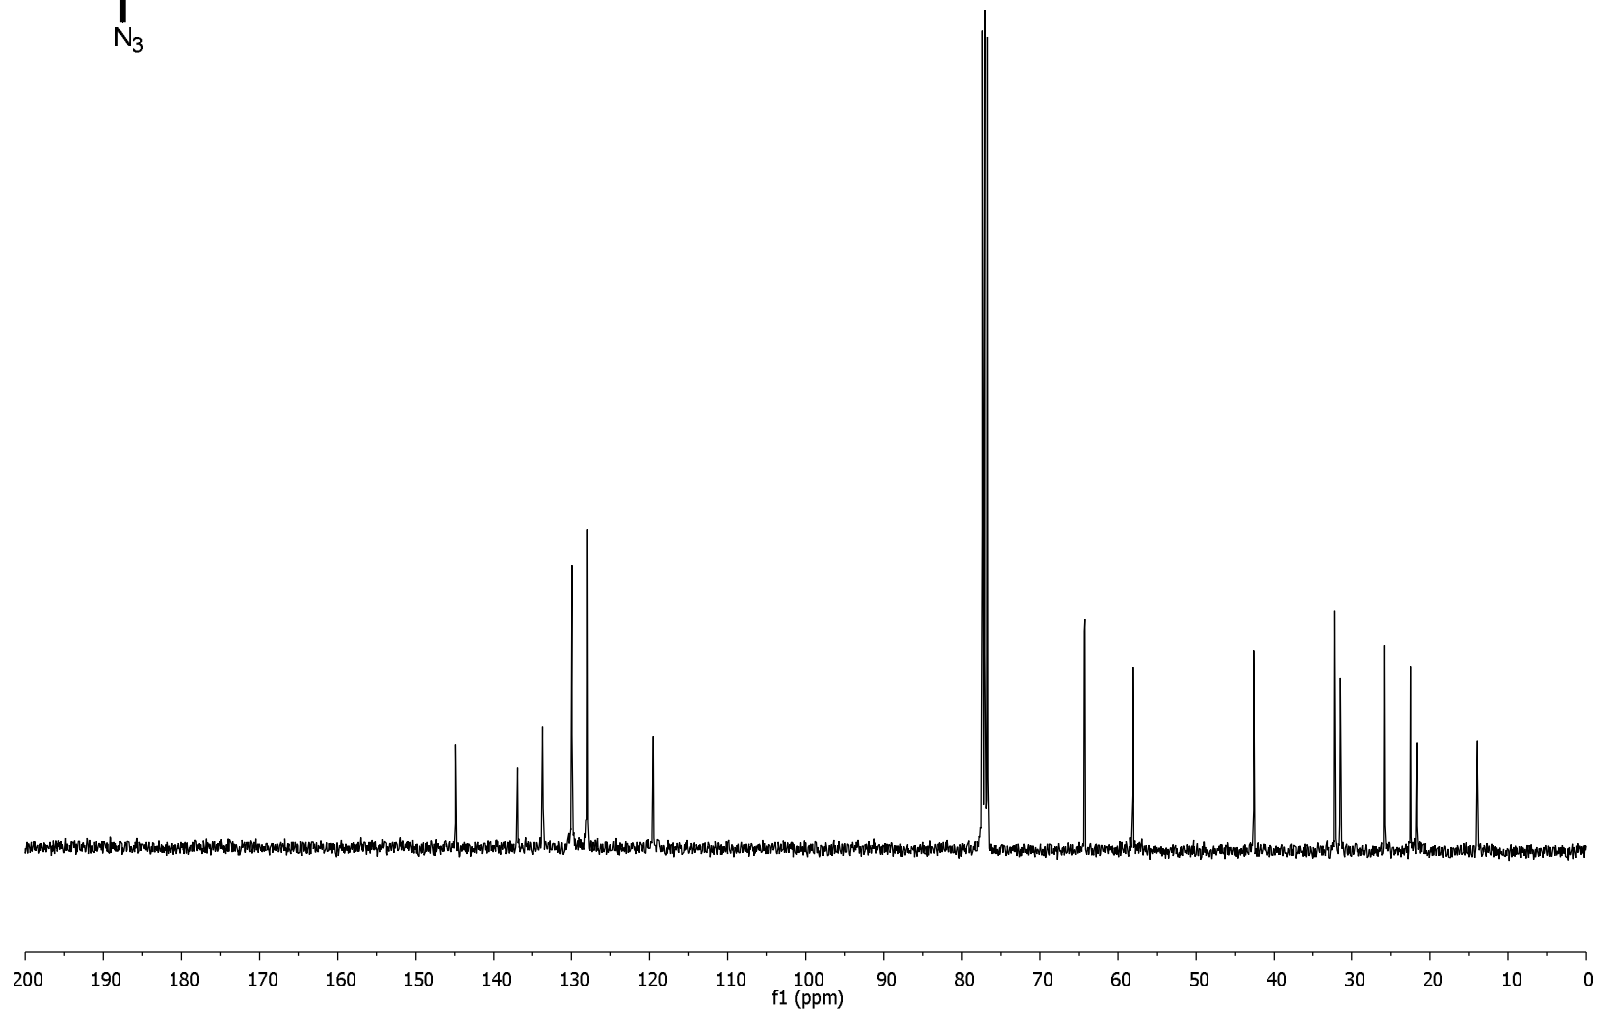

*syn-15a*, 100 MHz, CDCl<sub>3</sub>

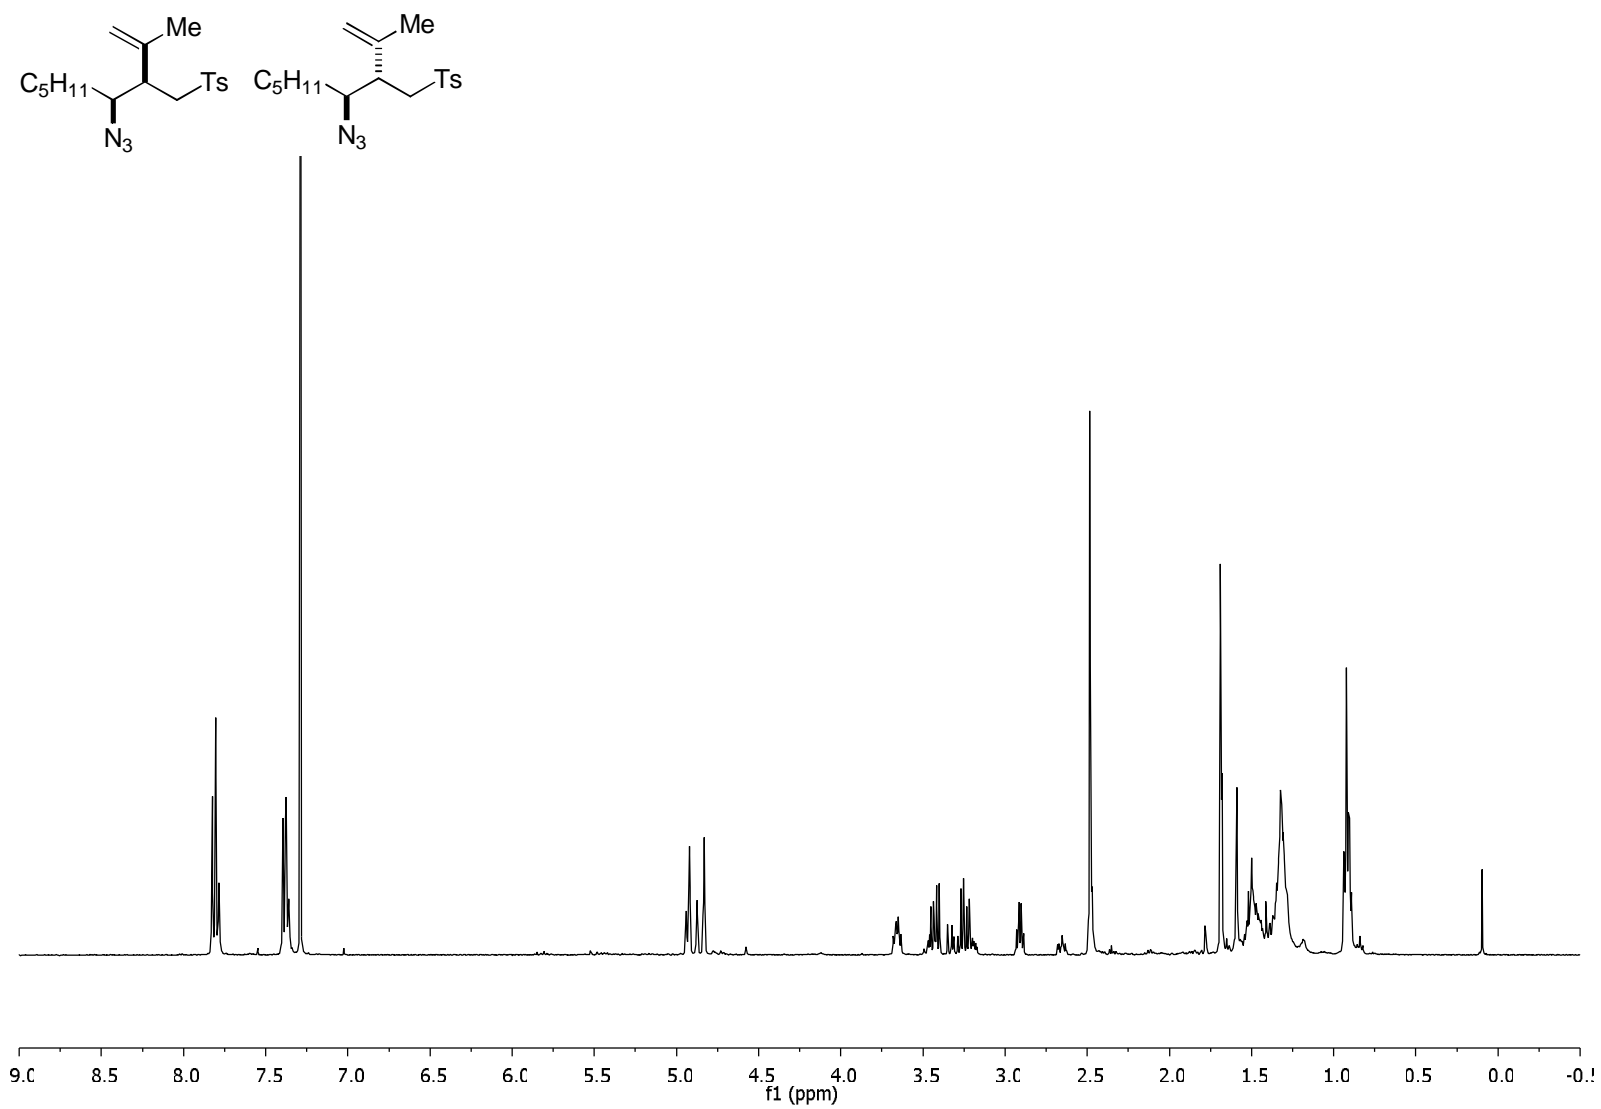

*syn*-15b and *anti*-15b, 400 MHz, CDCl<sub>3</sub>

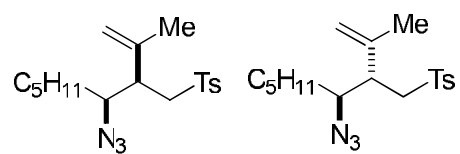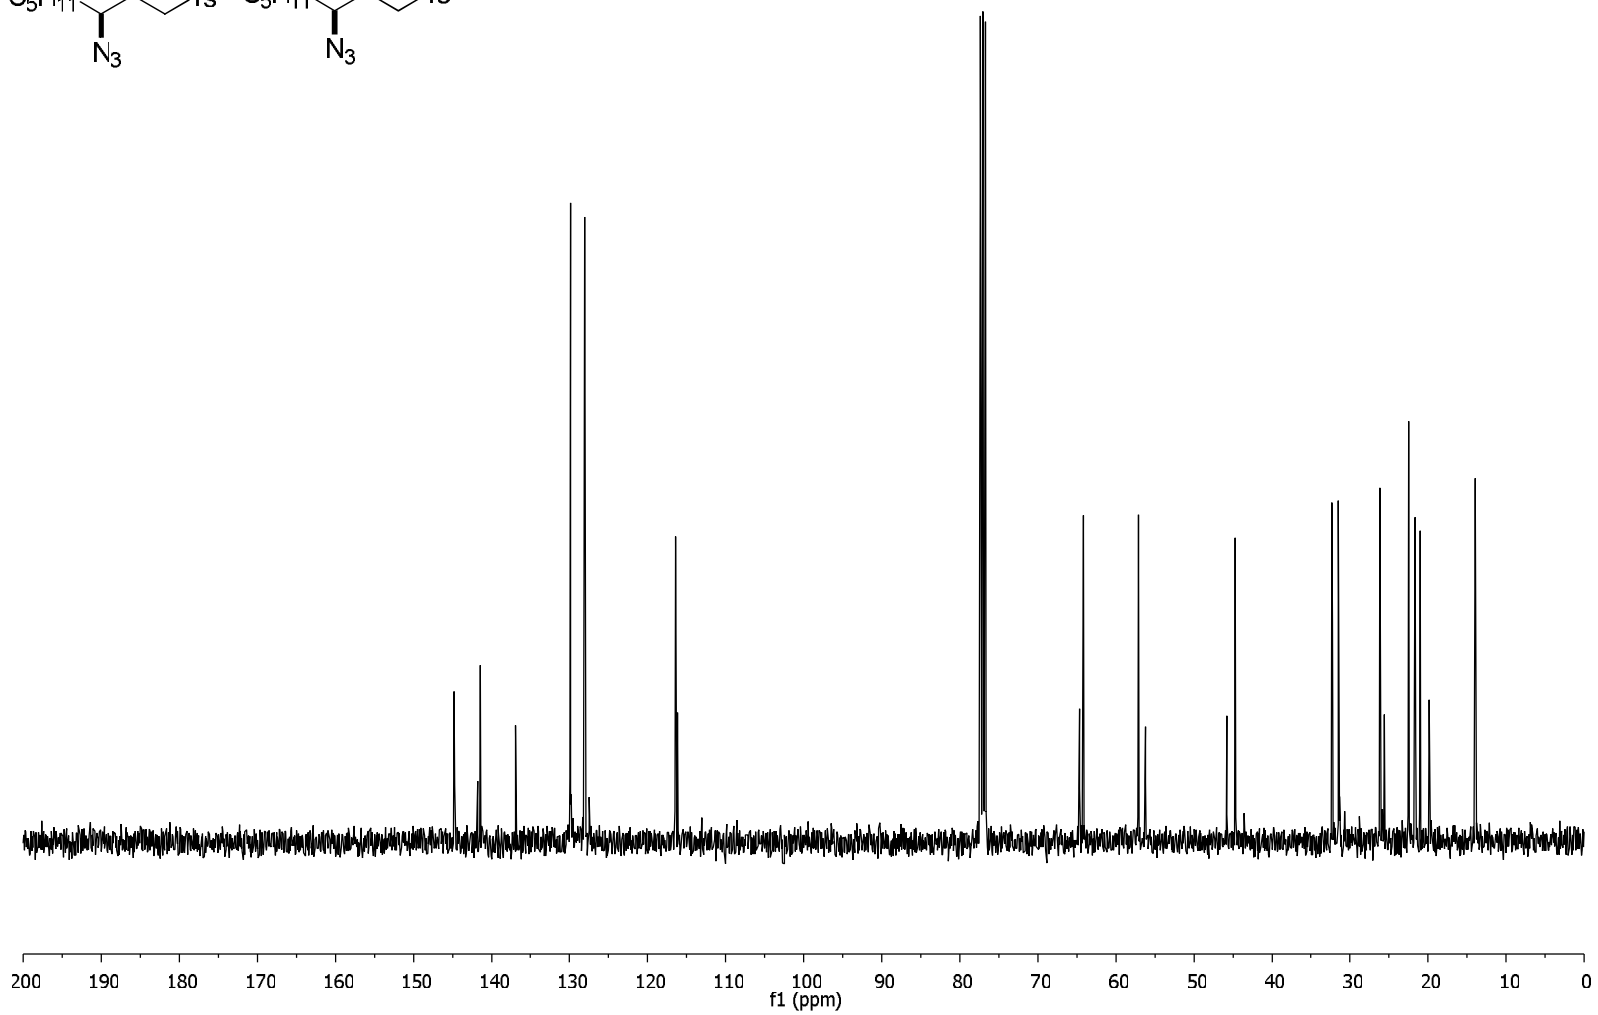

*syn*-15b and *anti*-15b, 100 MHz, CDCl<sub>3</sub>

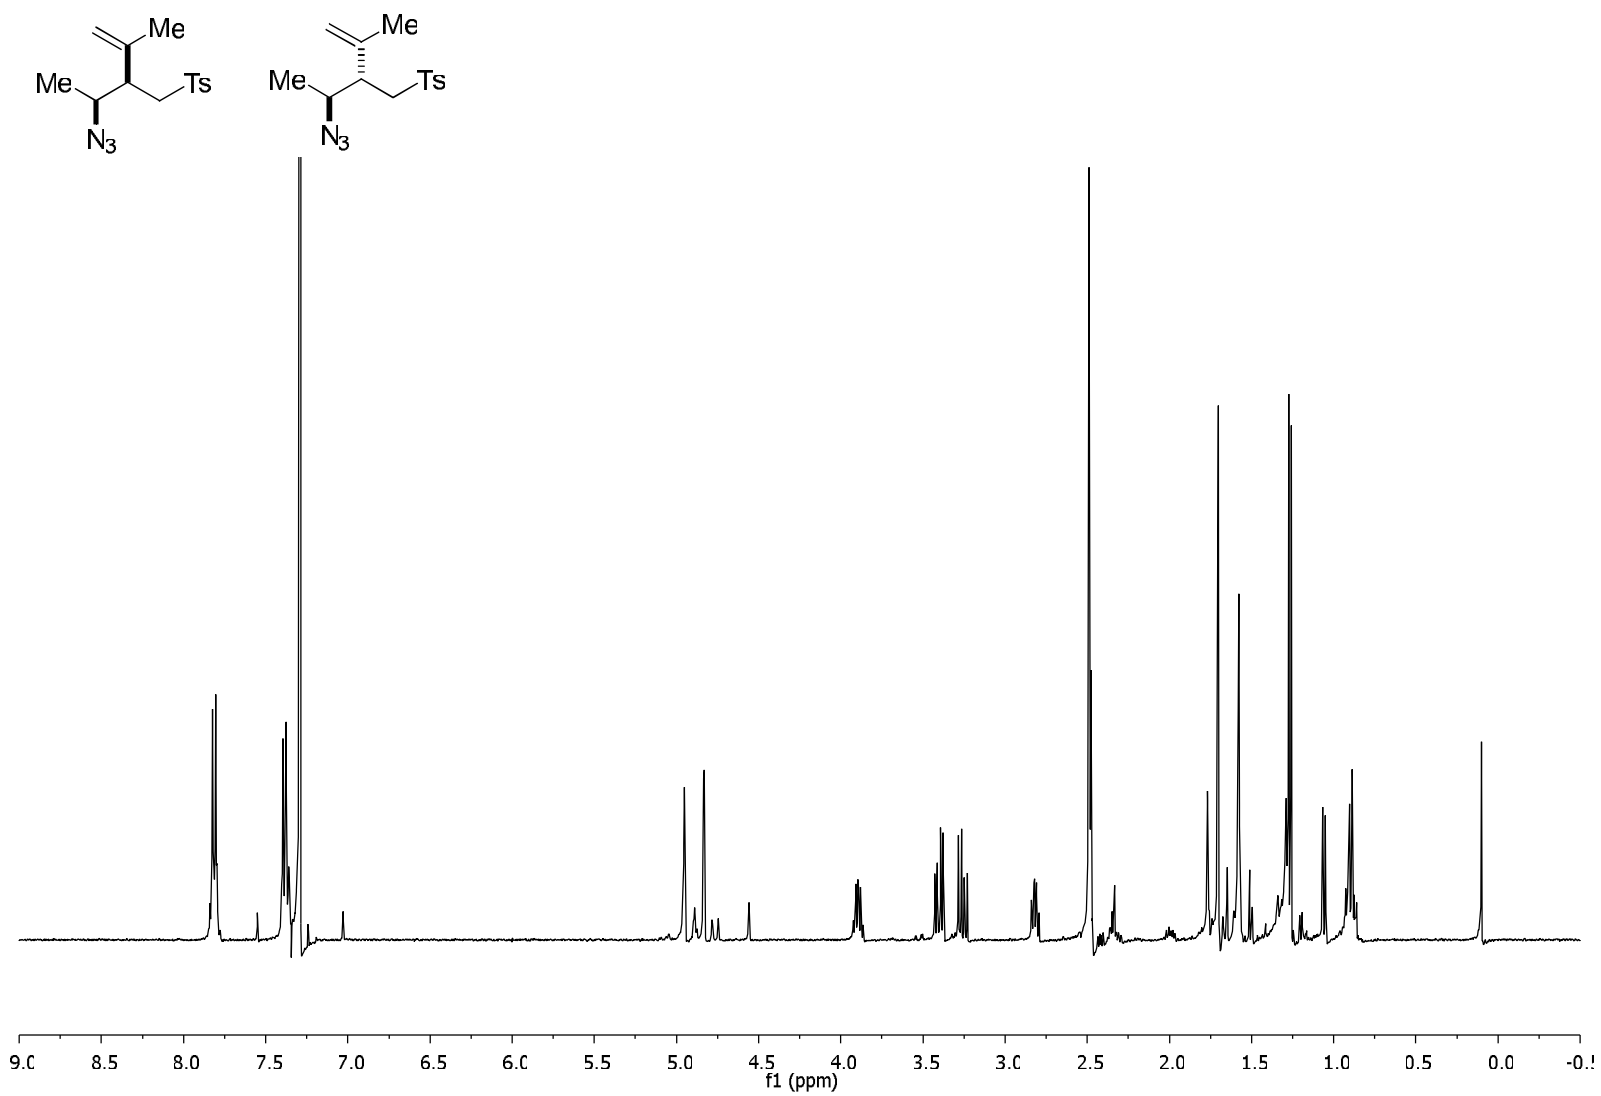

*syn*-15c and *anti*-15c, 400 MHz, CDCl<sub>3</sub>

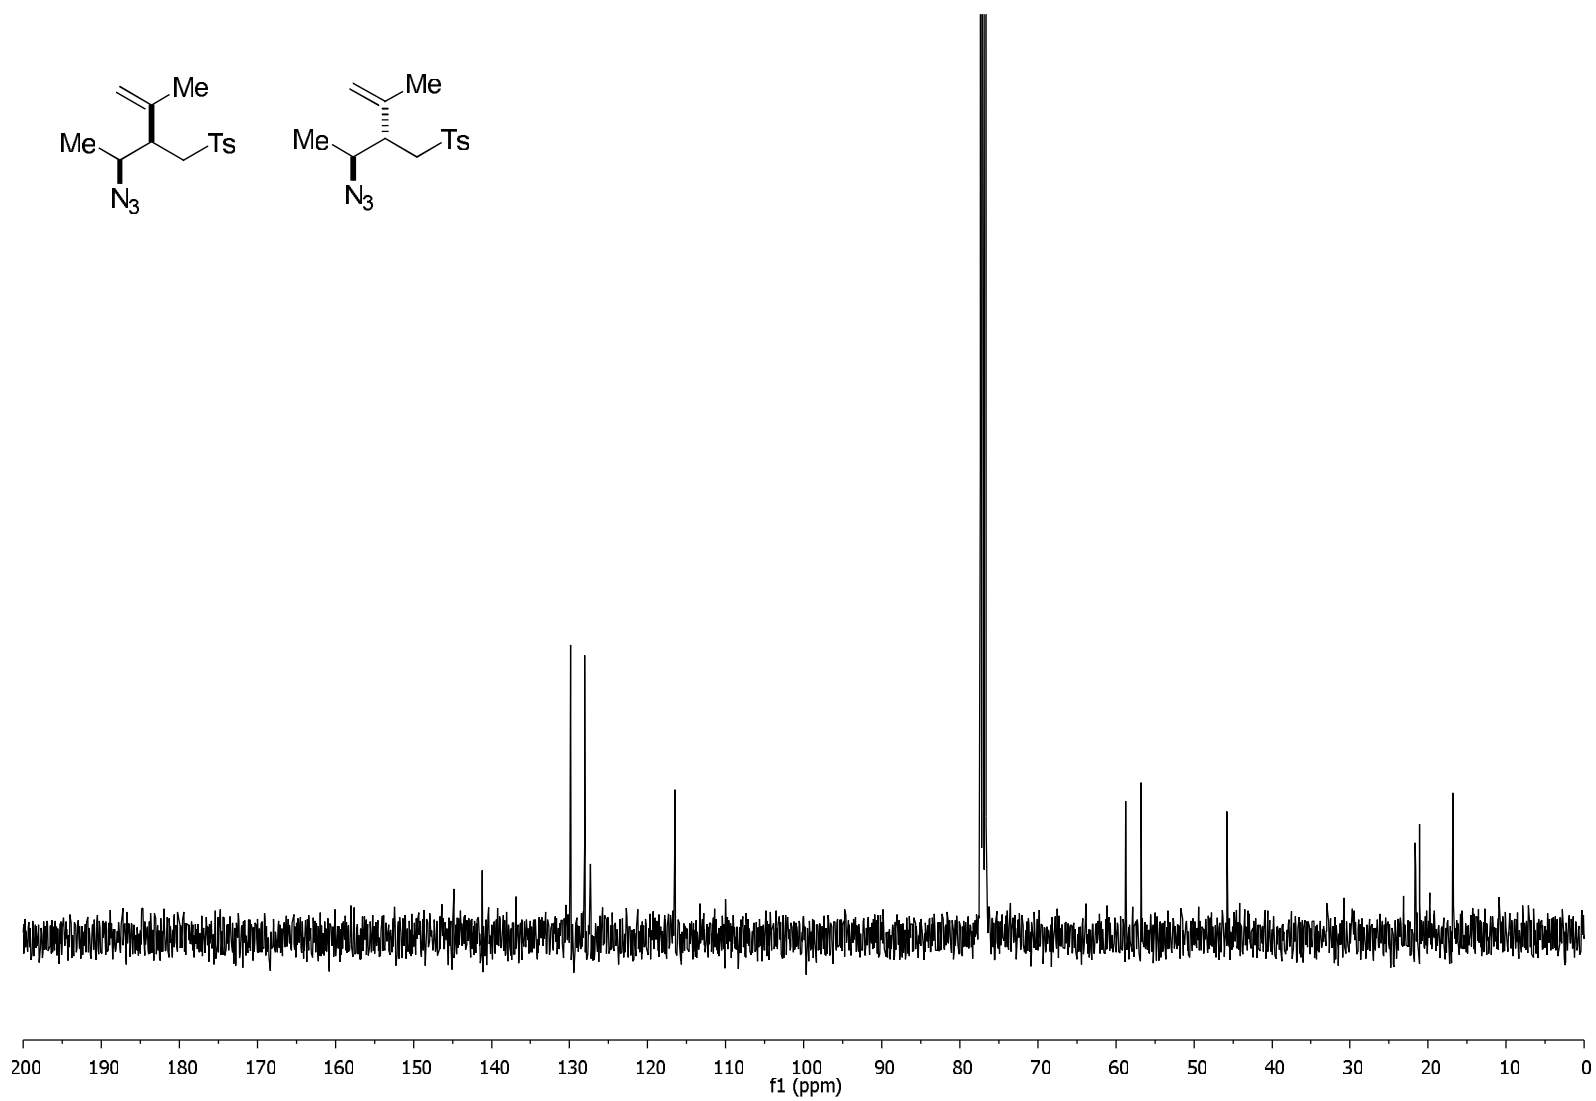

*syn*-15c and *anti*-15c, 100 MHz, CDCl<sub>3</sub>

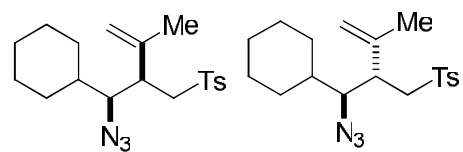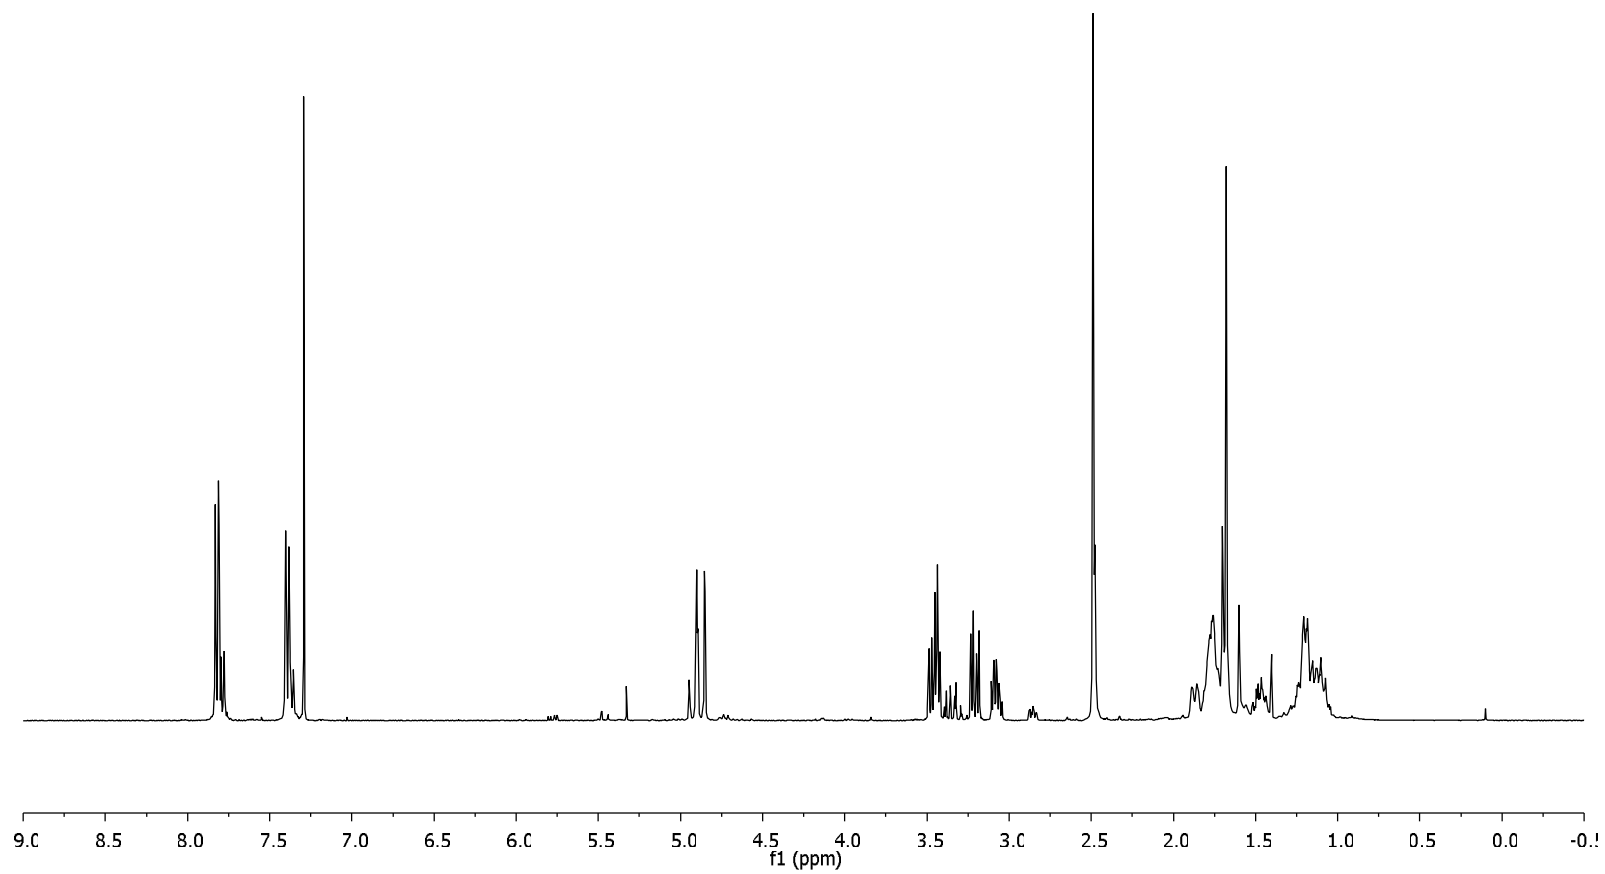

*syn-15d* and *anti-15d*, 400 MHz,  $CDCl_3$

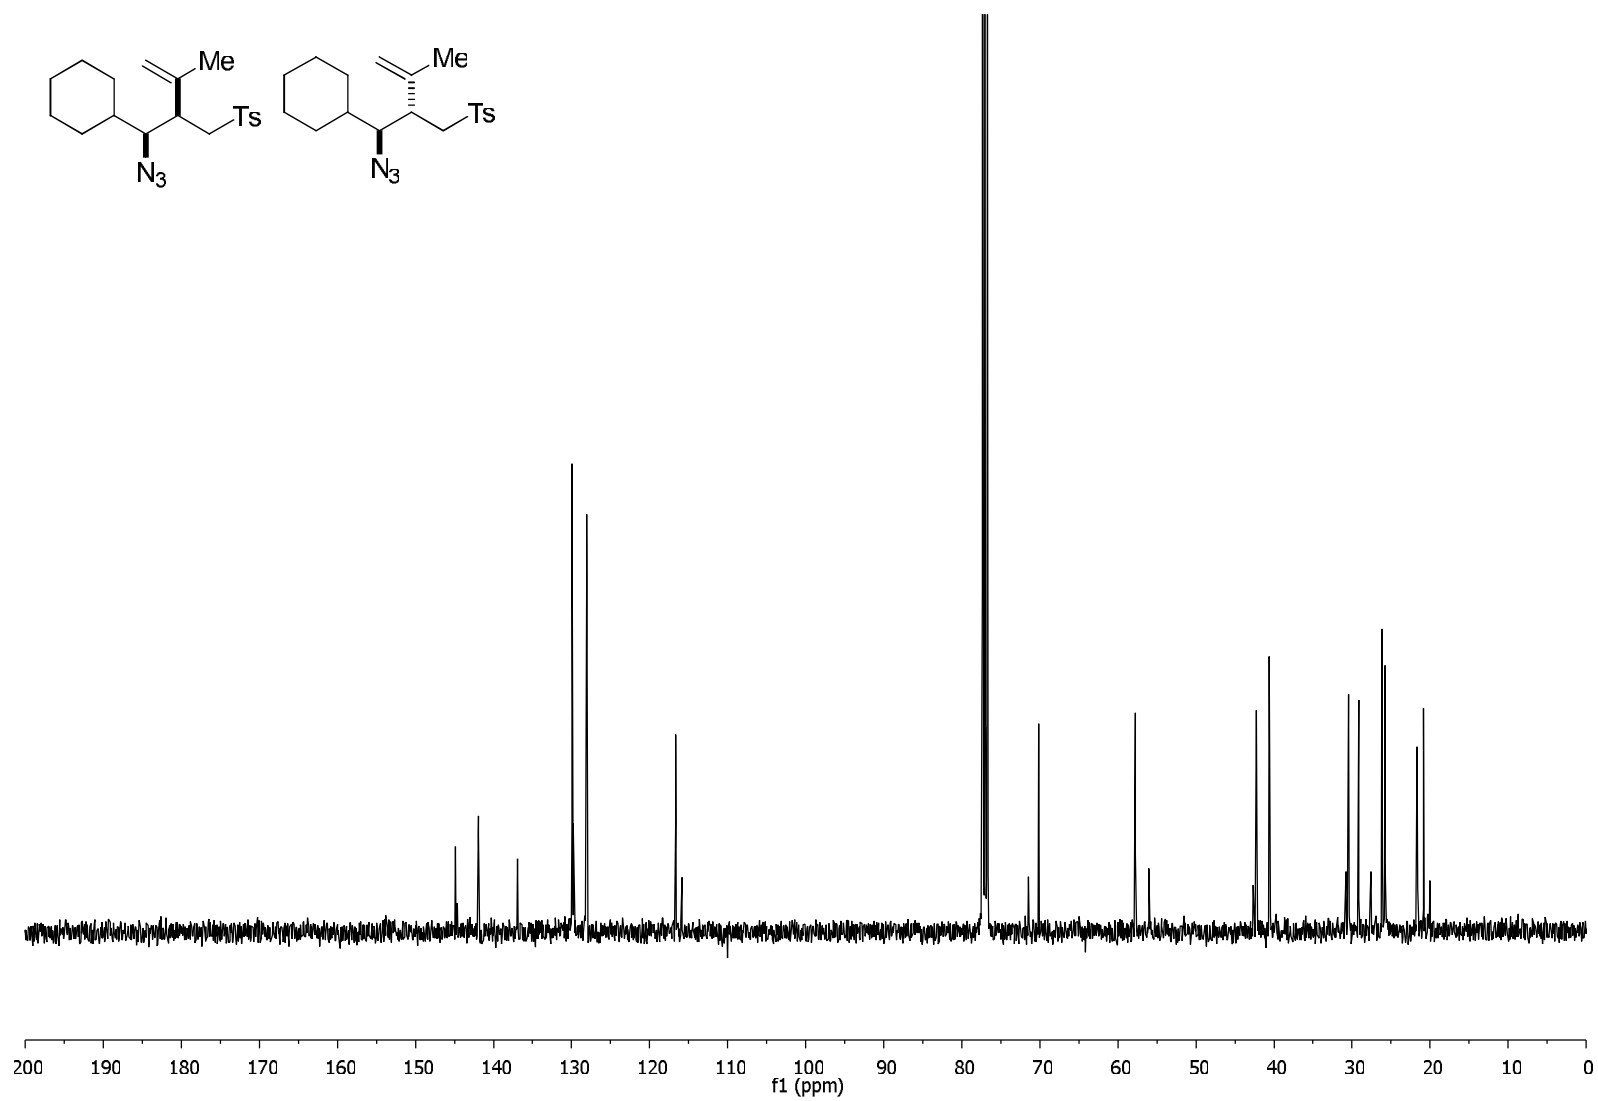

*syn*-15d and *anti*-15d, 100 MHz, CDCl<sub>3</sub>



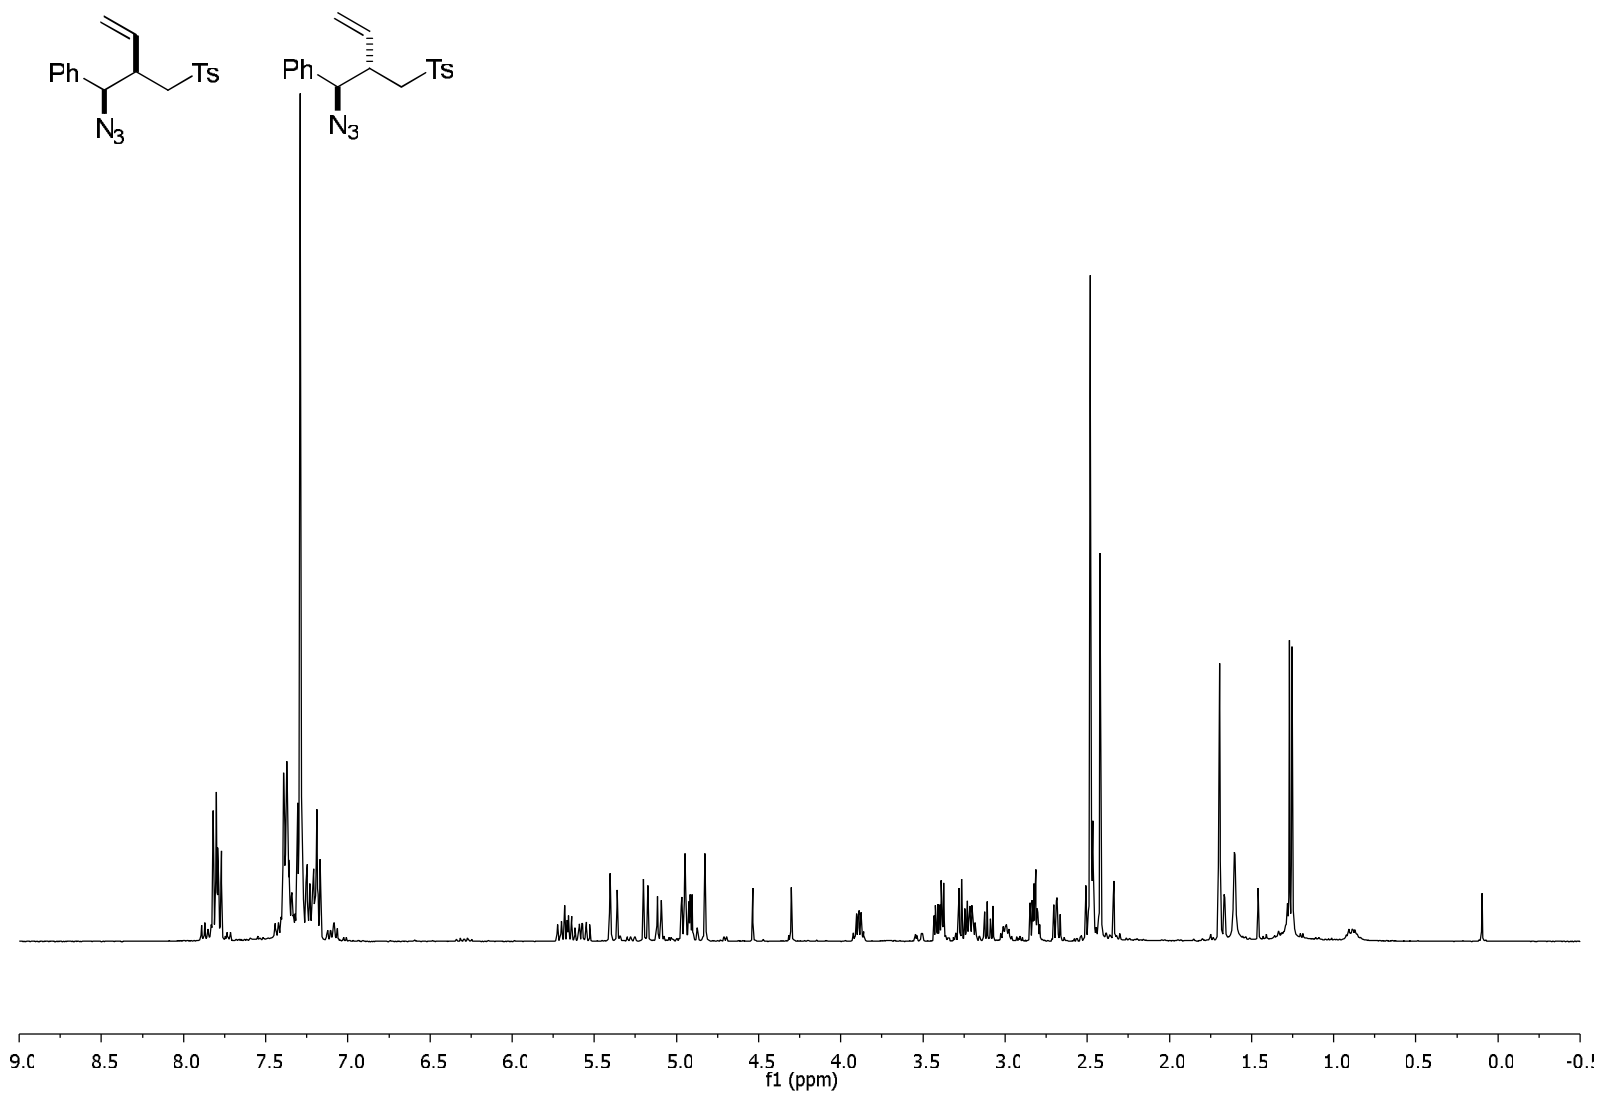

*syn*-15e and *anti*-15e, 100 MHz, CDCl<sub>3</sub>

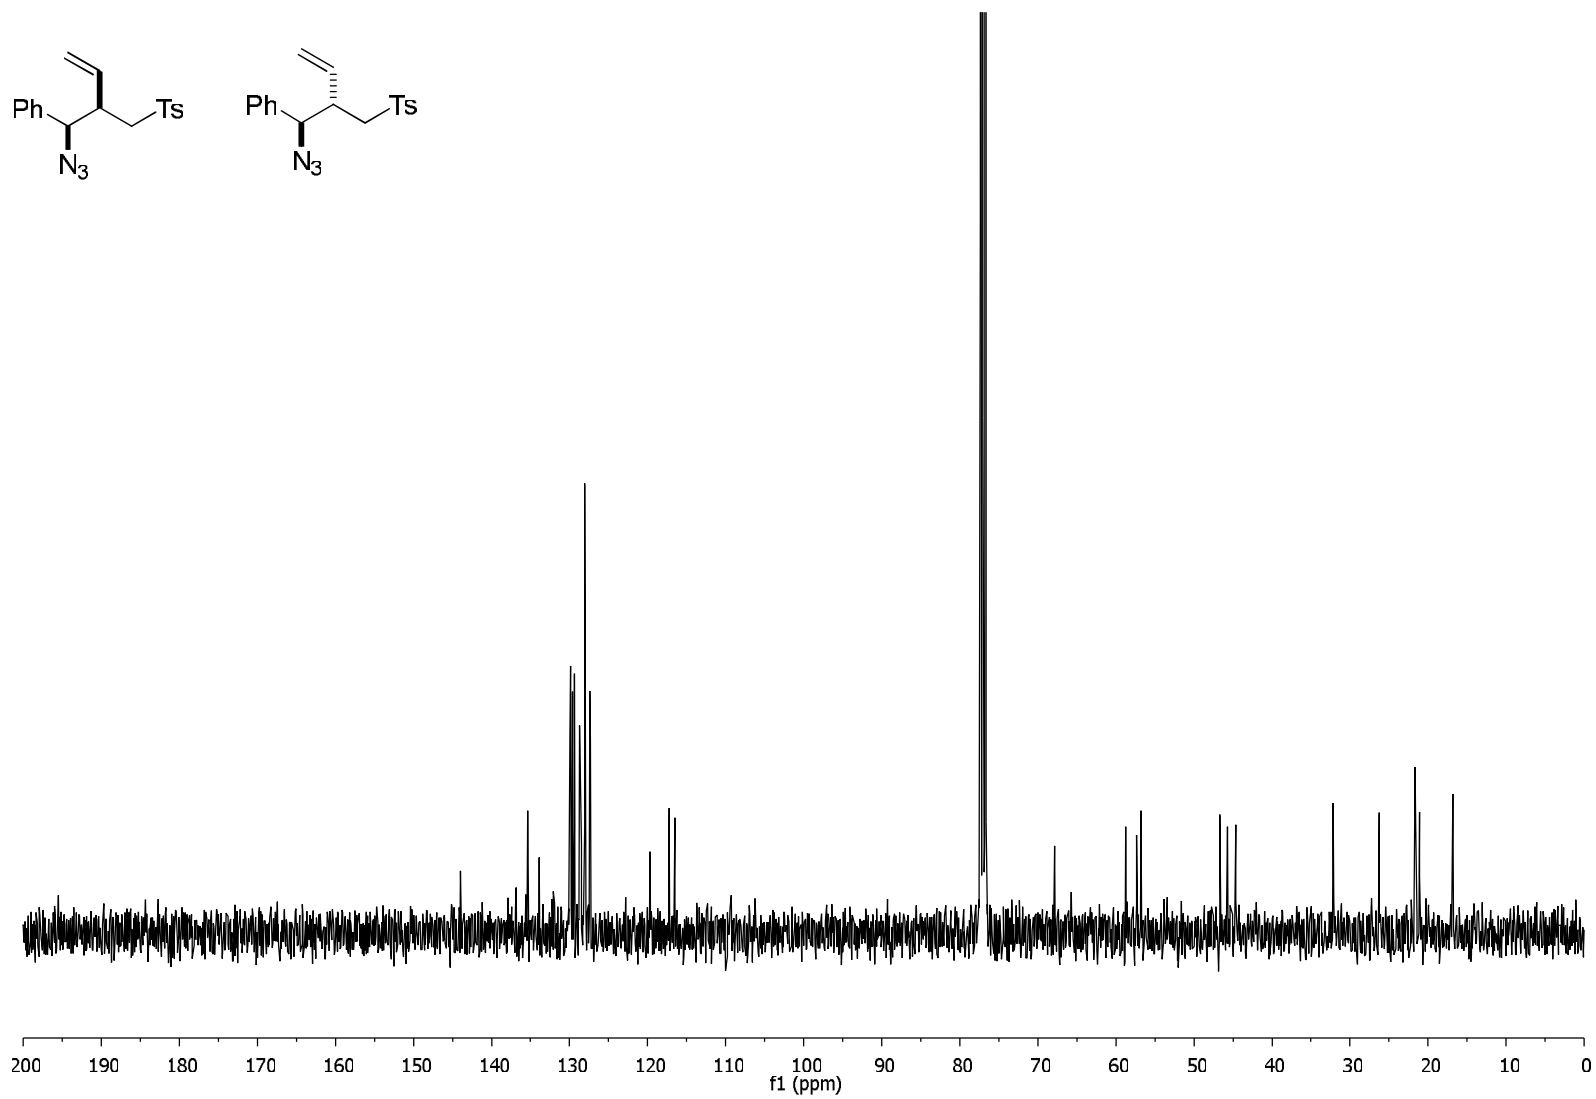

*syn-15e* and *anti-15e*, 100 MHz, CDCl<sub>3</sub>

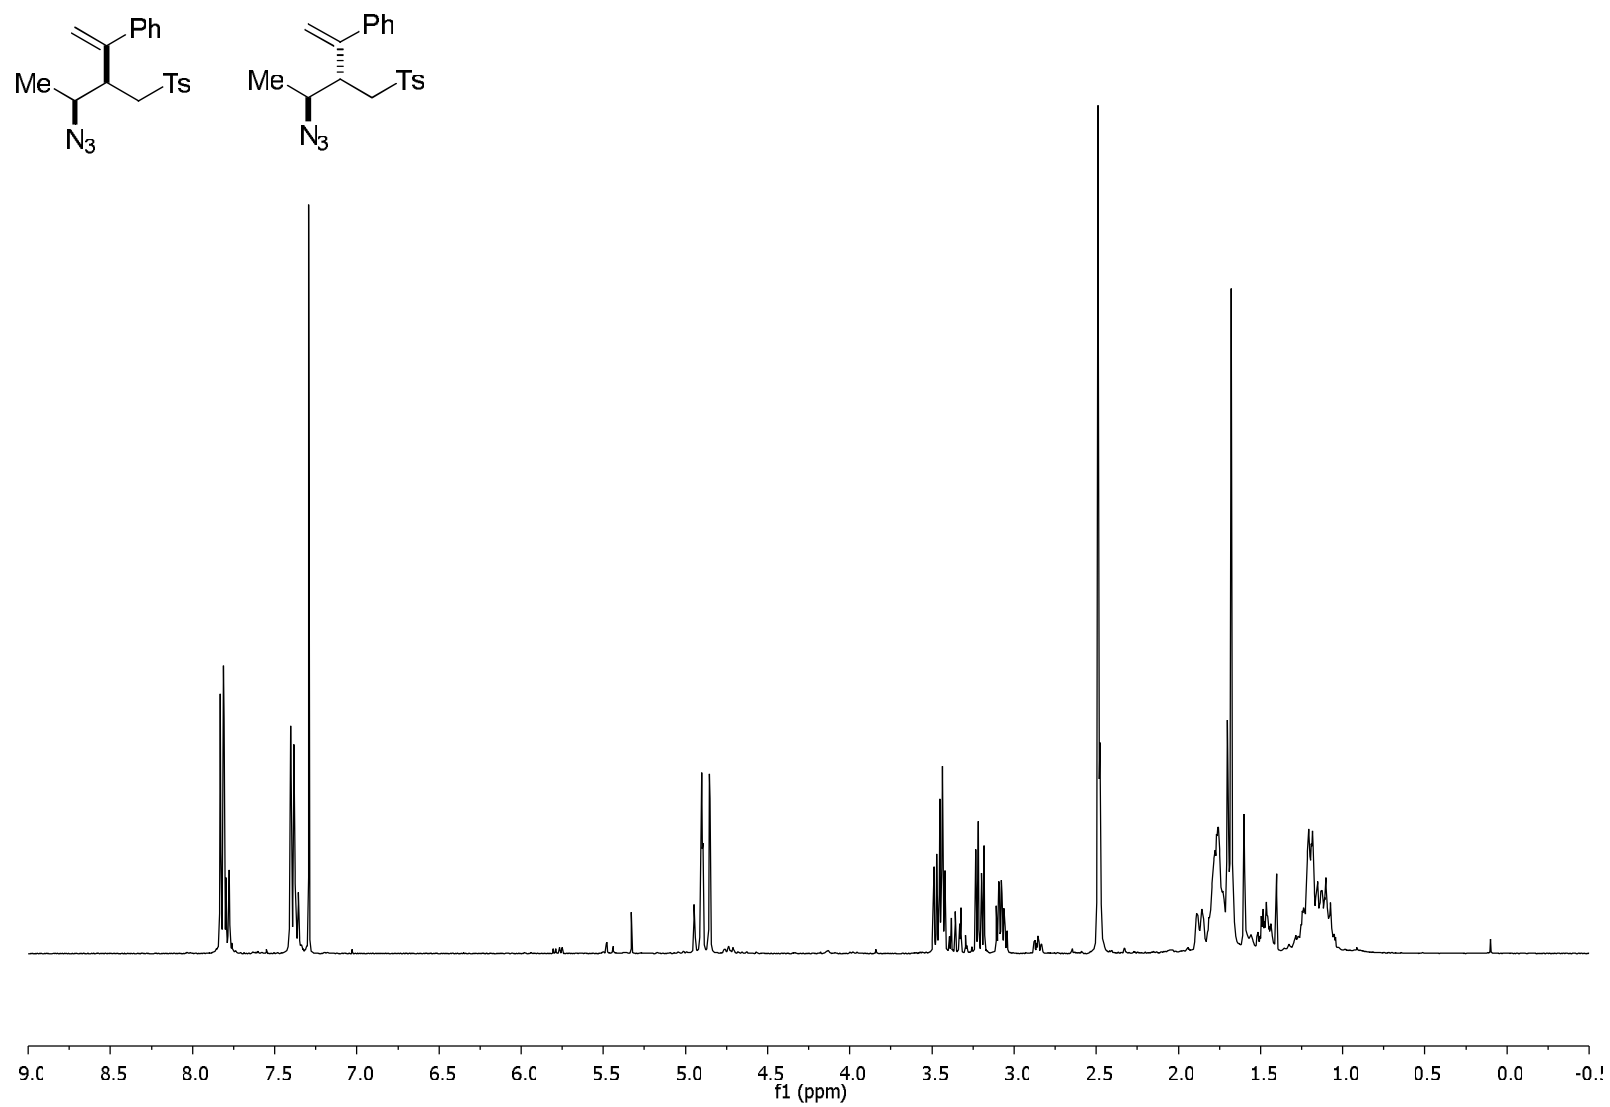

*syn*-15g and *anti*-15g, 400 MHz, CDCl<sub>3</sub>

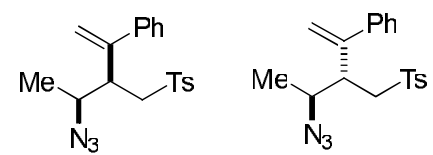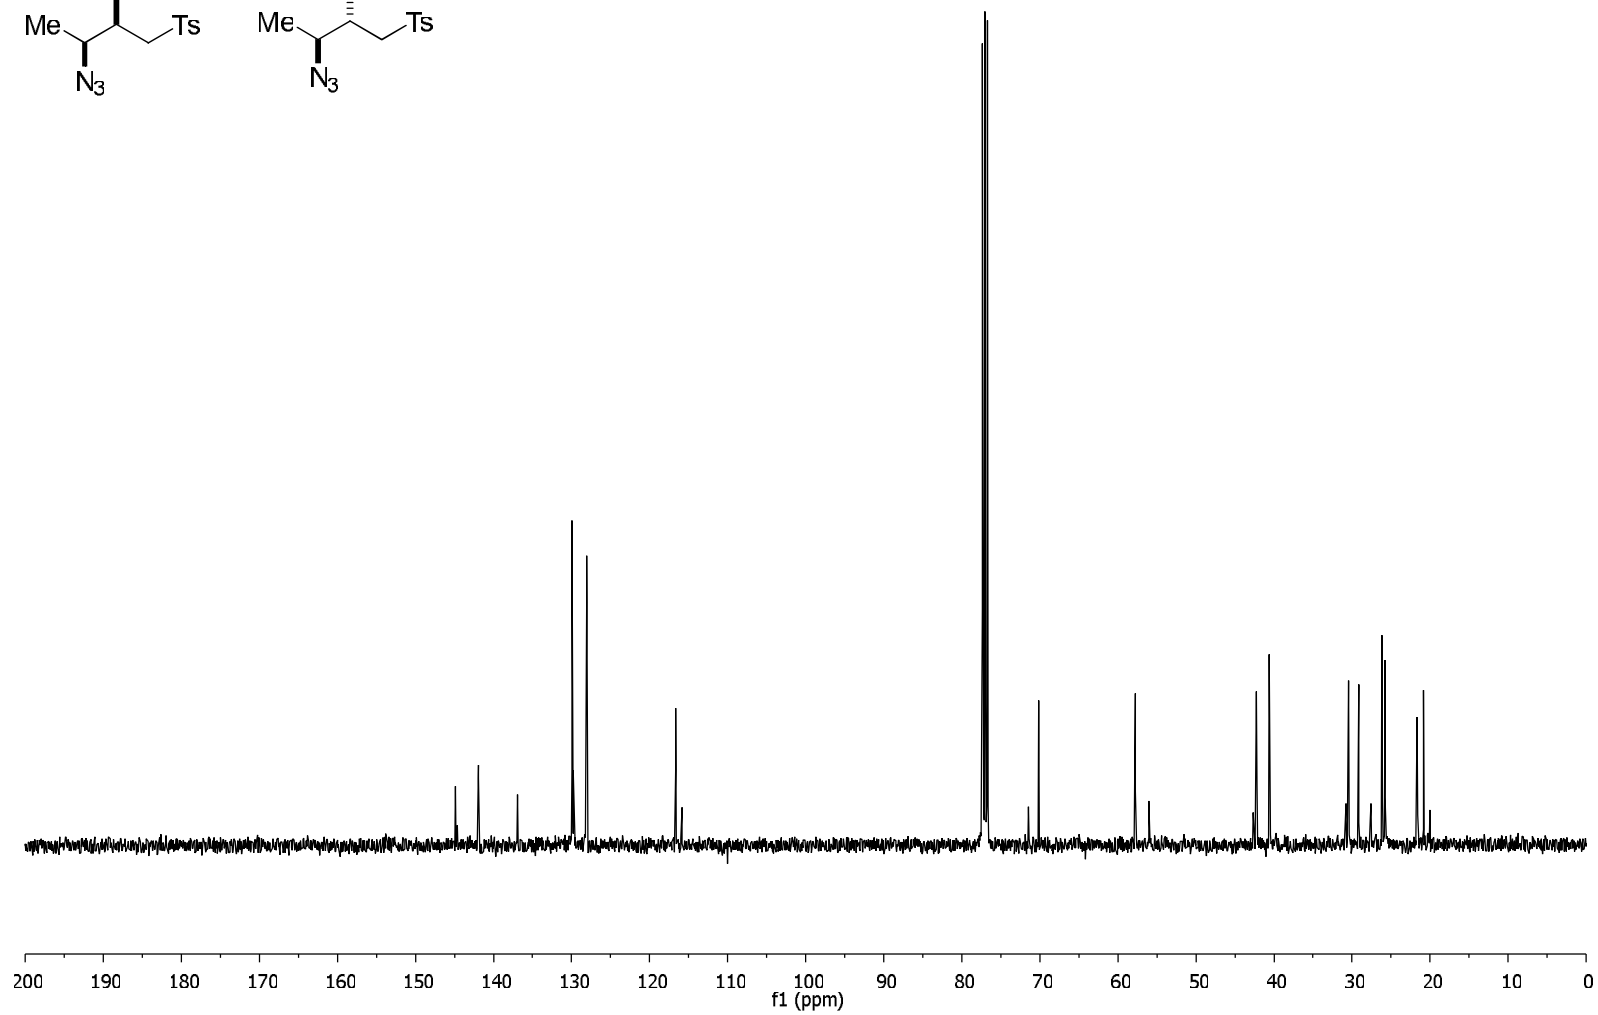

*syn-15g* and *anti-15g*, 100 MHz, CDCl<sub>3</sub>

This document was created with Win2PDF available at <http://www.win2pdf.com>.  
The unregistered version of Win2PDF is for evaluation or non-commercial use only.  
This page will not be added after purchasing Win2PDF.
